# Supplementary material for: The Cancer Patient Experiences Questionnaire (CPEQ): reliability and construct validity following a national survey to assess hospital cancer care from the patient perspective
Source: PubMed Central journal article supplement — BMJ Open. 2012 Sep 28;2(5):e001437. doi: 10.1136/bmjopen-2012-001437 (PMC3488707; doi:10.1136/bmjopen-2012-001437), 2012-09-28

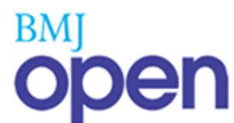

**The Cancer Patient Experiences Questionnaire (CPEQ):  
reliability and construct validity following a national survey  
to assess hospital cancer care from the patient perspective**

|                                 |                                                                                                                                                                                                                           |
|---------------------------------|---------------------------------------------------------------------------------------------------------------------------------------------------------------------------------------------------------------------------|
| Journal:                        | <i>BMJ Open</i>                                                                                                                                                                                                           |
| Manuscript ID:                  | bmjopen-2012-001437                                                                                                                                                                                                       |
| Article Type:                   | Research                                                                                                                                                                                                                  |
| Date Submitted by the Author:   | 07-May-2012                                                                                                                                                                                                               |
| Complete List of Authors:       | Iversen, Hilde; The Norwegian Knowledge Centre for the Health Services , Holmboe, Olaf; The Norwegian Knowledge Centre for the Health Services, Bjertnæs, Øyvind; The Norwegian Knowledge Centre for the Health Services, |
| <b>Primary Subject Heading</b>: | Health services research                                                                                                                                                                                                  |
| Secondary Subject Heading:      | Research methods                                                                                                                                                                                                          |
| Keywords:                       | Patient satisfaction, Cancer, Validity and reliability                                                                                                                                                                    |
|                                 |                                                                                                                                                                                                                           |

SCHOLARONE™  
Manuscripts

1  
2  
3 **The Cancer Patient Experiences Questionnaire (CPEQ): reliability and construct**  
4 **validity following a national survey to assess hospital cancer care from the patient**  
5 **perspective**  
6  
7  
8  
9

10  
11 **Hilde Hestad Iversen<sup>§</sup>, Olaf Holmboe, Øyvind Andresen Bjertnæs**  
12  
13

14  
15  
16 Department for Quality Measurement and Patient Safety

17  
18 Norwegian Knowledge Centre for the Health Services

19  
20 PO Box 7004 St. Olavs plass,

21  
22 0130 Oslo

23  
24 Norway

25  
26  
27  
28  
29 <sup>§</sup>Corresponding author:

30  
31 Telephone: +47-46400425

32  
33 Fax: +47-23255010

34  
35 HII: [hii@nokc.no](mailto:hii@nokc.no)  
36  
37  
38  
39  
40  
41  
42  
43  
44  
45  
46  
47  
48

49  
50 Keywords: Patient satisfaction, Cancer, Survey, Reliability and validity, Confirmatory factor  
51 analysis  
52  
53  
54

55  
56 3965 words  
57  
58  
59  
60

## ABSTRACT

### Objectives

Patient experience questionnaires have been criticised due to the lack of supporting psychometric evidence. The objective of this study was to describe the development and psychometric evaluation of the Cancer Patient Experiences Questionnaire (CPEQ) in Norway.

### Design

Questionnaire development was based on a literature review of existing questionnaires, patient interviews, expert-group consultations, pretesting of questionnaire items and a national survey. Psychometric evaluation included exploratory and confirmatory factor analysis, and tests of internal consistency reliability and test-retest reliability.

### Setting

Data were collected using a postal survey of cancer patients attending 54 hospitals in all 4 health regions. The subjects were 14,227 adult cancer patients who had attended an outpatient clinic or who had been discharged from an inpatient ward. Patients with all types of cancer were included. Data quality, internal consistency reliability and construct validity were assessed.

### Results

Of the 13,846 patients who received the CPEQ, 7212 (52%) responded. Exploratory factor analysis identified six scales of outpatient experiences relating to nurse contact, doctor contact, information, organisation, patient safety and next of kin, and seven scales of inpatient experiences, with the addition of hospital standard to the aforementioned scales. All but two

1  
2  
3 of the scales met the criterion of 0.70 for Cronbach's alpha testing, and test-retest correlations  
4  
5 ranged from 0.57 to 0.85. Confirmatory factor analysis supported the interpretation of six and  
6  
7 seven scales for outpatients and inpatients, respectively. Statistically significant associations  
8  
9 based on explicit hypotheses provided evidence for the construct validity of the scales. One  
10  
11 additional scale measuring the hospital level was identified ( $\alpha=0.85$ ).  
12  
13

## 14 15 16 **Conclusions**

17  
18 The CPEQ is a self-report instrument that includes the most important aspects of patient  
19  
20 experiences with cancer care at hospitals. The instrument was tested following a national  
21  
22 survey in Norway; good evidence is provided herein for the internal consistency reliability,  
23  
24 test-retest reliability and construct validity.  
25  
26  
27  
28  
29  
30  
31  
32  
33  
34  
35  
36  
37  
38  
39  
40  
41  
42  
43  
44  
45  
46  
47  
48  
49  
50  
51  
52  
53  
54  
55  
56  
57  
58  
59  
60

## ARTICLE SUMMARY

### Article focus

- To describe the development and evaluation of the Cancer Patient Experiences Questionnaire (CPEQ).
- Data quality, internal consistency reliability and construct validity were assessed.

### Key messages

- Patient satisfaction questionnaires have generally been criticised due to the lack of supporting psychometric evidence, including reliability and validity data.
- Valid and reliable measures for the measurement of cancer patients' experiences with hospitals are crucial if the data are to be used in quality improvement, business control and by both patients and the general public.

### Strengths and limitations of this study

- The strengths of the present study include the psychometric assessment of the CPEQ following a national survey, including data quality, dimensionality, internal consistency and construct validity.
- The scale should prove useful for evaluating cancer patients' experiences with hospitals in Norway and in similar settings in other countries, and includes the most important aspects regarding both inpatient and outpatient hospital care from the patient perspective.
- Further investigation of the explanatory characteristics of variations in cancer patients' experience with health care is warranted.

## INTRODUCTION

The measurement of patient experiences is now recognised as an important part of health-care performance evaluation. Patient experiences are included as one of three core quality dimensions in the Organisation for Economic Cooperation and Development quality indicator framework,[1] and are central to the framework of the World Health Organisation for assessing the performance of health systems.[2] Several studies have shown that patient experiences are positively related to patient satisfaction [3, 4] and that patient satisfaction is positively associated with compliance [5] and health outcomes.[4] Eliciting feedback from patients helps health-care providers to identify potential areas for improvement, which in turn can increase the quality of health care.

The acquisition of valid information requires patient experiences to be measured using rigorously developed and validated tools. Patient satisfaction questionnaires have generally been criticised due to the lack of supporting psychometric evidence, including reliability and validity data. A review of 195 patient satisfaction papers published in 1994 found that the satisfaction instruments presented little evidence of reliability or validity,[6] casting doubt on the credibility of the resultant findings. Furthermore, questionnaires that ask patients to rate their care in terms of how satisfied they are tend to elicit very positive ratings.[4] A more valid approach is to ask patients to report in detail on their experiences by asking them specific questions about certain processes and events; this will provide results that can be easily interpreted and acted upon.[7]

Norway has a national patient experience survey program that is run by the Norwegian Knowledge Centre for the Health Services. The purpose of the program is to systematically measure user experiences with health care, to provide data for quality improvement, business

1  
2  
3 control, hospital choice and public accountability. In 2007, the Ministry of Health in Norway  
4  
5 decided to measure cancer patients' experiences with hospitals. The Norwegian Knowledge  
6  
7 Centre for the Health Services has developed and validated several generic instruments to be  
8  
9 used in national patient experience surveys,[8–19] but none specifically for cancer patients.  
10  
11 Ensuring the sensitivity of the instrument and detecting changes that are significant for the  
12  
13 patient requires instruments specific to the study objective as well as the population of interest  
14  
15 to be developed.[20] A review of the literature was conducted to determine whether there was  
16  
17 an instrument that included multidimensional scales including different aspects of cancer  
18  
19 patient experiences. Two national surveys of patients' experiences of cancer services have  
20  
21 been carried out in the UK: the first in 1999–2000 by the National Patient Survey Programme  
22  
23 [21] and the second in 2004 by the National Audit Office.[22] However, these surveys  
24  
25 included only six types of cancer: breast, colorectal, lung, ovarian, prostate and non-  
26  
27 Hodgkin's lymphoma. Other questionnaires identified in the review typically addressed  
28  
29 quality of life, or involved specific cancer types, treatments, services or clinical staff; no  
30  
31 measures appropriate for all cancer types, including assessment of inpatient and outpatient  
32  
33 cancer care, were identified. Consequently, the literature review identified shortcomings with  
34  
35 existing measures, and it was decided to develop a new instrument to measure the experiences  
36  
37 of hospital care of both inpatients and outpatients that could be used in a future national  
38  
39 survey in Norway.  
40  
41  
42  
43  
44  
45  
46

47 This paper describes the development and evaluation of the Cancer Patient Experiences  
48  
49 Questionnaire (CPEQ). This tool was designed for application in a national survey of adult  
50  
51 cancer patients, whereby the results are published in the form of reports for the public, the  
52  
53 government and individual health-care units as a basis for national surveillance, quality  
54  
55 improvement and hospital choice.  
56  
57  
58  
59  
60

## METHODS

### Questionnaire development

The questionnaire was developed based on the findings of a literature review of questionnaires aimed to determine cancer patients' experiences with hospitals, semi-structured interviews with 13 cancer patients, and focus groups of experts including clinicians and representatives for cancer patient organisations. This process was designed to ensure content validity and that the questionnaire addresses important aspects of cancer patient experiences of care, and to establish a model for including participants in the survey. The development of the questionnaire also followed previous work in the identification of domains and items of relevance for the patients.[8–19] We tested the questionnaire by performing cognitive interviews with 12 cancer patients and a pilot study of 953 cancer patients at a single hospital. The cognitive interviews and the pilot study suggested minor changes to the questionnaire, which were discussed within the group of experts before finalisation.

We asked the patients about their overall experiences with a specific hospital. The questionnaire was divided into separate sections for inpatients and outpatients, consisting mainly of the same questions, except for six questions included in the inpatient section about hospital standards and waiting time. The questionnaire also included items concerning aspects of care irrespective of out- or inpatient settings, as well as sociodemographic and health-status questions. The final questionnaire comprised 127 items. In this study we enquired about experiences that do not apply to all patients but which are considered important to the relevant patients. Consequently, the levels of missing data were expected to reflect patients being at different stages of cancer treatment and having varying levels of experience with hospital care.



### Data collection

The questionnaire was mailed to 14,227 patients with all types of cancer aged 16 years or older who had at least one outpatient appointment or a hospital stay at a Norwegian hospital from 20 September to 10 December 2009. A maximum of 400 patients from each of the 54 hospitals was included; 400 patients were selected randomly from hospitals with more than 400 eligible patients. The hospitals had the opportunity to exclude patients who were not considered applicable to participate in a survey, and the patients themselves could withdraw from the survey at any time by contacting the hospital. Checks were undertaken to ensure that patients were not sent more than one questionnaire, and the first hospital episode with a cancer registration was taken as the episode to use in the survey sample for patients who appeared on the lists more than once. Units for palliative care and birth and maternity departments were excluded from the survey. The questionnaires were mailed to the patients by the end of January to mid-May 2010. Non-responders were sent one reminder after 3 weeks. We also mailed a retest questionnaire to 291 consenting patients approximately 1 week after their first reply for the purpose of assessing test-retest reliability. After the completion of data collection the patient contact information was deleted and the hospitals transferred the demographic, clinical and administrative data, which were merged with the patients' responses.

The survey was approved by the Norwegian Regional Committee for Medical Research Ethics, the Data Inspectorate, and the Ministry of Health and Care Services.

### Statistical analysis

Most statistical analyses were carried out using SPSS version 15.0. Confirmatory factor analyses (CFAs) were conducted using the linear structural relation (LISREL) analysis

1  
2  
3 program. STREAMS (Structural Equation Modelling Made Simple) offers an interface to the  
4  
5 LISREL program and was used as a support.[23]  
6  
7

8  
9  
10 Separate exploratory factor analyses (EFAs) were carried out for outpatients and inpatients  
11  
12 using principal axis factoring. We expected some correlations among the factors and chose  
13  
14 oblique rotation (promax). The criterion for the number of factors to be rotated was  
15  
16 eigenvalues greater than 1, and items with factor loadings lower than 0.4 were excluded.  
17  
18

19  
20  
21 Cronbach's alpha coefficient was calculated to determine the internal consistency of the  
22  
23 scales. An alpha value greater than 0.70 is considered satisfactory.[24, 25] Internal  
24  
25 consistency was also assessed by item-total correlation, measuring the strength of the  
26  
27 association between an individual item and the total score of the remainder of its scale. A  
28  
29 correlation coefficient of 0.30 or higher has been recommended previously.[26] The intraclass  
30  
31 correlation coefficient was used as an estimate of the test-retest reliability, and was used to  
32  
33 assess the correlation between scores obtained at different times for each scale; the estimated  
34  
35 coefficients should exceed 0.7.[24]  
36  
37

38  
39  
40 The item structure from EFAs was used to construct theoretically derived scales. CFA was  
41  
42 applied to further test the relationship between the observed variables and their underlying  
43  
44 latent constructs identified from the EFAs. The LISREL analysis program was used to test the  
45  
46 goodness of fit of the models [27] using various fit indexes, including the root mean square  
47  
48 error of approximation (RMSEA), the goodness-of-fit index (GFI), the comparative fit index  
49  
50 (CFI) and the incremental fit index (IFI). An RMSEA of 0.05 or less, and a GFI and CFI of  
51  
52 0.90 or above are generally taken to indicate a good fit. The IFI values range from 0 to 1, with  
53  
54 larger values indicating a better goodness of fit.  
55  
56  
57  
58  
59  
60

1  
2  
3 Construct validity refers to whether a scale measures or is correlated with the theorised  
4  
5 scientific construct, and was assessed by exploring the associations of scale scores as well as  
6  
7 their associations with additional items not included in the scales. A systematic review  
8  
9 identified 139 articles that provided evidence about determinants of satisfaction,[4] and  
10  
11 concluded that satisfaction was linked to prior satisfaction, predisposition, utilisation, granting  
12  
13 of desires, health status, health outcomes and age. Evidence about the effects of gender,  
14  
15 ethnicity, socioeconomic status and expectations was equivocal. Following the literature  
16  
17 review and previous findings,[4–17] it was hypothesised that scale scores would be correlated  
18  
19 with global satisfaction, age, gender and health status. Time since cancer diagnosis and  
20  
21 whether the treatment provided was considered the best possible were also hypothesised as  
22  
23 potential determinants.  
24  
25  
26  
27  
28

## 29 **RESULTS**

### 30 **Data collection**

31  
32 Of the 14,227 questionnaires that were mailed to cancer patients, 137 were returned due to  
33  
34 erroneous addresses, and 244 of the patients had died. Accordingly, the adjusted total sample  
35  
36 was 13,846 patients, of which 7212 responded (52%), 6642 patients with experiences from  
37  
38 outpatient wards and 4856 patients from inpatient wards; 4460 patients had attended both  
39  
40 inpatient and outpatient wards at the hospital. Table 1 lists the characteristics of the  
41  
42 respondents.  
43  
44  
45  
46  
47  
48  
49  
50  
51  
52  
53  
54  
55  
56  
57  
58  
59  
60

Table 1. Patient characteristics. Except where stated otherwise, data are *n* (%) values.

| Variable                             | Outpatients<br>(N=6642) | Inpatients<br>(N=4856) | All respondents<br>(N=7212)<br><i>n</i> (%) |
|--------------------------------------|-------------------------|------------------------|---------------------------------------------|
| <b>Gender</b>                        |                         |                        |                                             |
| Male                                 | 3733 (56)               | 2590 (53)              | 4049 (56)                                   |
| Female                               | 2908 (44)               | 2265 (47)              | 3162 (44)                                   |
| <b>Age in years (mean±SD)</b>        | 66±12.2                 | 66±12.2                | 66±12.1                                     |
| <b>Education level</b>               |                         |                        |                                             |
| Primary school                       | 1742 (27)               | 1319 (28)              | 1947 (28)                                   |
| High school                          | 2408 (38)               | 1831 (39)              | 2608 (38)                                   |
| University undergraduate             | 1425 (22)               | 983 (21)               | 1519 (22)                                   |
| University postgraduate              | 838 (13)                | 557 (12)               | 884 (13)                                    |
| <b>Native language</b>               |                         |                        |                                             |
| Norwegian                            | 6324 (97)               | 4628 (97)              | 6858 (97)                                   |
| Sami                                 | 7 (0)                   | 6 (0)                  | 7 (0)                                       |
| Other Nordic                         | 59 (1)                  | 35 (1)                 | 64 (1)                                      |
| Other European                       | 92 (1)                  | 70 (2)                 | 100 (1)                                     |
| Non-European                         | 35 (1)                  | 30 (1)                 | 39 (1)                                      |
| <b>Main activity</b>                 |                         |                        |                                             |
| Work                                 | 1556 (24)               | 1128 (24)              | 1670 (24)                                   |
| Sick leave                           | 1270 (20)               | 994 (21)               | 1369 (19)                                   |
| Retired                              | 3537 (54)               | 2516 (53)              | 3860 (55)                                   |
| Education                            | 33 (1)                  | 27 (1)                 | 35 (1)                                      |
| Home worker                          | 52 (1)                  | 43 (1)                 | 56 (1)                                      |
| Unemployed                           | 24 (0)                  | 18 (0)                 | 28 (0)                                      |
| Other                                | 50 (1)                  | 43 (1)                 | 56 (1)                                      |
| <b>Marital status</b>                |                         |                        |                                             |
| Married                              | 4559 (71)               | 3302 (70)              | 4941 (71)                                   |
| Cohabitant                           | 529 (8)                 | 409 (9)                | 579 (8)                                     |
| Neither married nor cohabitant       | 1347 (21)               | 991 (21)               | 1457 (21)                                   |
| <b>Type of cancer (ICD-10 codes)</b> |                         |                        |                                             |
| Breast                               | 884 (13)                | 669 (14)               | 932 (13)                                    |
| Female genitalia                     | 452 (7)                 | 363 (8)                | 489 (7)                                     |
| Male genitalia                       | 1449 (22)               | 822 (17)               | 1591 (22)                                   |
| Skin                                 | 493 (7)                 | 119 (3)                | 512 (7)                                     |
| Respiratory organs                   | 347 (5)                 | 273 (6)                | 386 (5)                                     |
| Urinary tract                        | 697 (11)                | 641 (13)               | 751 (10)                                    |
| Digestive organs                     | 866 (13)                | 860 (18)               | 984 (14)                                    |
| Blood                                | 1031 (16)               | 728 (15)               | 1103 (15)                                   |
| Other                                | 422 (6)                 | 380 (8)                | 463 (6)                                     |
| <b>Time since diagnosis</b>          |                         |                        |                                             |
| Less than 3 months                   | 171 (3)                 | 132 (3)                | 209 (3)                                     |
| 3–6 months                           | 807 (12)                | 562 (12)               | 929 (13)                                    |
| 6–12 months                          | 1192 (18)               | 840 (18)               | 1295 (18)                                   |
| 1–2 years                            | 1205 (18)               | 883 (19)               | 1286 (18)                                   |
| 2–5 years                            | 1740 (27)               | 1286 (27)              | 1864 (26)                                   |
| More than 5 years                    | 1424 (22)               | 1070 (22)              | 1498 (21)                                   |
| <b>Type of contact</b>               |                         |                        |                                             |
| Examination                          | 3876 (58)               | 2747 (57)              | -                                           |
| Surgery                              | 1928 (29)               | 3189 (66)              | -                                           |
| Radiotherapy                         | 1082 (16)               | 510 (11)               | -                                           |
| Chemotherapy                         | 2345 (35)               | 1181 (24)              | -                                           |
| Hormone therapy                      | 663 (10)                | 220 (5)                | -                                           |
| Control/follow up                    | 4456 (67)               | 1960 (40)              | -                                           |
| Other                                | 492 (7)                 | 570 (12)               | -                                           |

*N*, total number; *n*, number of responses received; ICD-10, International Classification of Diseases, 10th Revision

### Data quality and psychometric evaluation

The levels of missing data and descriptive statistics for the items are presented in Table 2. The levels of missing data ranged from 2% to 12%, which can be considered as acceptable for most items. Responses in the category “not applicable” ranged from 2% to 33%. However, since the questionnaire was intended to apply to all cancer patients, rates of not applicable or missing data higher than 10% were accepted. Mean scores for single items were generally skewed towards a positive rating (Table 2). The mean scores were lowest (at 3.2 for both outpatients and inpatients) for information about pain and pain alleviation. The mean scores were highest for items about patient safety, and ranged from 4.5 to 4.7.

Separate EFAs were conducted for outpatients and inpatients. Results from the first factor analyses for both outpatients and inpatients showed that most of the items addressing organisation loaded on the first factor, which related to nurse contact. For outpatients, this was also the case for items about next of kin. Based on both empirical and theoretical assumptions, summed rating scales were constructed for organisation (outpatients and inpatients) and next of kin (outpatients).

Further analyses where these items were omitted produced four factors for outpatients and six for inpatients (see Table 2). All item-total correlation coefficients exceeded the 0.4 criterion (range 0.41–0.86). The four factors related to outpatients’ experiences were nurse contact, doctor contact, information and patient safety; the alpha values ranged from 0.61 to 0.92. The four-factor solution accounted for 62% of the total variance. The same four factors were produced for inpatients, comprising the equivalent items, as well as two other factors (next of kin and hospital standard); the alpha values ranged from 0.67 to 0.94. These six factors explained 63% of the total variance in the scores for inpatients’ experiences. Table 2 lists the

1  
2  
3 factor loadings. All factor loadings for the items exceeded 0.4, and no item had a cross-  
4  
5 loading greater than or equal to 0.40.  
6  
7

8  
9 Alpha values for 11 of the 13 scales satisfied the criterion of 0.70 or higher (Table 2).

10  
11 Cronbach's alpha is sensitive to the number of test items, and the two patient safety scales  
12 that did not meet the criterion of 0.70 (0.614 and 0.667) had three test items each. Item-total  
13 correlation coefficients showed that all items satisfied the stated criterion of 0.40, and it was  
14 decided to keep the six scales for measuring outpatient experiences and the seven scales for  
15 measuring inpatient experiences. Of the 291 patients mailed a retest questionnaire, 229  
16 responded (79%). Table 2 lists the results of the test-retest correlations for the 13 scales. The  
17 test-retest correlation coefficients ranged from 0.57 to 0.81 for outpatients and from 0.62 to  
18 0.85 for inpatients.  
19  
20  
21  
22  
23  
24  
25  
26  
27  
28  
29  
30  
31  
32  
33  
34  
35  
36  
37  
38  
39  
40  
41  
42  
43  
44  
45  
46  
47  
48  
49  
50  
51  
52  
53  
54  
55  
56  
57  
58  
59  
60

Table 2. Descriptive statistics<sup>a</sup>, factor loadings and internal consistency for outpatients and inpatients.

| Scale/item                           | Outpatients (N=6642) |                    |                   |      |                 |                                                     |                                              | Inpatients (N=4856) |                    |                   |      |                 |                                                     |                                              |
|--------------------------------------|----------------------|--------------------|-------------------|------|-----------------|-----------------------------------------------------|----------------------------------------------|---------------------|--------------------|-------------------|------|-----------------|-----------------------------------------------------|----------------------------------------------|
|                                      | Missing (%)          | Does not apply (%) | Mean <sup>a</sup> | SD   | Factor loadings | Cronbach's alpha/item-total correlation coefficient | Test-retest reliability <sup>b</sup> (n=229) | Missing (%)         | Does not apply (%) | Mean <sup>a</sup> | SD   | Factor loadings | Cronbach's alpha/item-total correlation coefficient | Test-retest reliability <sup>b</sup> (n=229) |
| <b>Nurse contact</b>                 |                      |                    | 79.8              |      |                 | 0.92                                                | 0.73                                         |                     |                    | 76.8              |      |                 | 0.93                                                | 0.83                                         |
| 1. Updated about your treatment      | 5                    | 9                  | 4.2               | 0.74 | 0.63            | 0.72                                                |                                              | 5                   | 5                  | 4.1               | 0.77 | 0.66            | 0.77                                                |                                              |
| 2. Followed up on side effects       | 6                    | 29                 | 4.0               | 0.94 | 0.64            | 0.73                                                |                                              | 6                   | 24                 | 4.0               | 0.85 | 0.75            | 0.78                                                |                                              |
| 3. Took your concerns seriously      | 6                    | 19                 | 4.2               | 0.79 | 0.80            | 0.81                                                |                                              | 6                   | 13                 | 4.1               | 0.81 | 0.93            | 0.84                                                |                                              |
| 4. Cared for you                     | 7                    | -                  | 4.4               | 0.70 | 0.88            | 0.79                                                |                                              | 5                   | -                  | 4.3               | 0.73 | 0.85            | 0.81                                                |                                              |
| 5. Provided enough time for dialogue | 8                    | -                  | 3.9               | 0.96 | 0.70            | 0.75                                                |                                              | 5                   | -                  | 3.6               | 0.99 | 0.63            | 0.75                                                |                                              |
| 6. Was understandable                | 7                    | -                  | 4.3               | 0.70 | 0.72            | 0.73                                                |                                              | 5                   | -                  | 4.2               | 0.70 | 0.62            | 0.72                                                |                                              |
| 7. Was competent                     | 8                    | -                  | 4.3               | 0.68 | 0.67            | 0.71                                                |                                              | 5                   | -                  | 4.2               | 0.72 | 0.60            | 0.74                                                |                                              |
| <b>Doctor contact</b>                |                      |                    | 77.6              |      |                 | 0.92                                                | 0.81                                         |                     |                    | 75.8              |      |                 | 0.93                                                | 0.85                                         |
| 1. Updated about your treatment      | 5                    | 5                  | 4.3               | 0.77 | 0.65            | 0.73                                                |                                              | 6                   | 4                  | 4.2               | 0.76 | 0.77            | 0.76                                                |                                              |
| 2. Followed up on side effects       | 7                    | 30                 | 3.8               | 0.98 | 0.62            | 0.72                                                |                                              | 8                   | 28                 | 3.8               | 0.93 | 0.55            | 0.75                                                |                                              |
| 3. Took your concerns seriously      | 6                    | 15                 | 4.0               | 0.87 | 0.83            | 0.83                                                |                                              | 7                   | 14                 | 4.0               | 0.85 | 0.82            | 0.84                                                |                                              |
| 4. Cared for you                     | 6                    | -                  | 4.1               | 0.85 | 0.93            | 0.83                                                |                                              | 6                   | -                  | 4.0               | 0.86 | 0.94            | 0.84                                                |                                              |
| 5. Provided enough time for dialogue | 5                    | -                  | 3.8               | 0.98 | 0.85            | 0.79                                                |                                              | 7                   | -                  | 3.6               | 1.01 | 0.82            | 0.79                                                |                                              |
| 6. Was understandable                | 6                    | -                  | 4.2               | 0.77 | 0.72            | 0.75                                                |                                              | 6                   | -                  | 4.1               | 0.77 | 0.74            | 0.73                                                |                                              |
| 7. Was competent                     | 5                    | -                  | 4.4               | 0.72 | 0.66            | 0.72                                                |                                              | 6                   | -                  | 4.4               | 0.71 | 0.73            | 0.74                                                |                                              |
| <b>Information</b>                   |                      |                    | 67.0              |      |                 | 0.92                                                | 0.79                                         |                     |                    | 65.3              |      |                 | 0.94                                                | 0.78                                         |
| 1. Your illness                      | 2                    | 3                  | 3.9               | 0.87 | 0.47            | 0.73                                                |                                              | 4                   | 5                  | 3.8               | 0.96 | 0.47            | 0.76                                                |                                              |
| 2. Treatment options                 | 3                    | 8                  | 3.9               | 0.95 | 0.51            | 0.72                                                |                                              | 4                   | 11                 | 3.8               | 1.03 | 0.55            | 0.76                                                |                                              |
| 3. Examination and test results      | 3                    | 2                  | 4.0               | 0.91 | 0.41            | 0.67                                                |                                              | 4                   | 4                  | 3.9               | 0.96 | 0.44            | 0.72                                                |                                              |
| 4. Side effects of treatment         | 4                    | 14                 | 3.5               | 1.13 | 0.85            | 0.82                                                |                                              | 5                   | 18                 | 3.5               | 1.14 | 0.91            | 0.85                                                |                                              |
| 5. Effects of treatment              | 5                    | 13                 | 3.7               | 1.03 | 0.82            | 0.83                                                |                                              | 6                   | 14                 | 3.6               | 1.05 | 0.86            | 0.86                                                |                                              |
| 6. Pain to be expected               | 4                    | 18                 | 3.2               | 1.24 | 0.96            | 0.80                                                |                                              | 5                   | 17                 | 3.2               | 1.20 | 0.96            | 0.82                                                |                                              |
| 7. Pain relief                       | 5                    | 21                 | 3.2               | 1.26 | 0.92            | 0.77                                                |                                              | 6                   | 19                 | 3.3               | 1.18 | 0.91            | 0.80                                                |                                              |
| <b>Organisation</b>                  |                      |                    | 71.4              |      |                 | 0.78                                                | 0.77                                         |                     |                    | 69.0              |      |                 | 0.82                                                | 0.85                                         |
| 1. Cooperation between hospital      | 7                    | 21                 | 3.8               | 0.91 | -               | 0.59                                                |                                              | 7                   | 22                 | 3.8               | 0.95 |                 | 0.64                                                |                                              |

|                                                 |    |    |      |      |       |      |      |    |    |      |      |       |      |      |
|-------------------------------------------------|----|----|------|------|-------|------|------|----|----|------|------|-------|------|------|
| departments                                     |    |    |      |      |       |      |      |    |    |      |      |       |      |      |
| 2. Staff collaboration                          | 6  | 10 | 4.1  | 0.77 | -     | 0.64 |      | 6  | 8  | 4.0  | 0.78 |       | 0.71 |      |
| 3. Information provided to the correct person   | 8  | -  | 4.0  | 0.90 | -     | 0.52 |      | 8  | -  | 3.9  | 0.88 |       | 0.65 |      |
| 4. Same group of nurses                         | 10 | -  | 3.6  | 1.14 | -     | 0.49 |      | 5  | -  | 3.4  | 1.04 |       | 0.55 |      |
| 5. Multiple doctors involved was a problem      | 6  | 26 | 3.8  | 1.18 | -     | 0.47 |      | 7  | 18 | 3.8  | 1.14 |       | 0.49 |      |
| 6. One doctor responsible                       | 6  | -  | 3.8  | 1.24 | -     | 0.51 |      | 7  | -  | 3.7  | 1.23 |       | 0.55 |      |
| <b>Patient safety</b>                           |    |    | 90.6 |      |       | 0.61 | 0.57 |    |    | 90.5 |      |       | 0.67 | 0.62 |
| 1. Information deliberately held back           | 4  | -  | 4.5  | 0.87 | -0.57 | 0.44 |      | 5  | -  | 4.6  | 0.80 | -0.64 | 0.49 |      |
| 2. Contradictory information about illness      | 6  | -  | 4.7  | 0.74 | -0.55 | 0.43 |      | 6  | -  | 4.6  | 0.79 | -0.70 | 0.48 |      |
| 3. Perceived incorrect treatment                | 5  | 11 | 4.7  | 0.81 | -0.52 | 0.41 |      | 6  | 7  | 4.6  | 0.82 | -0.66 | 0.47 |      |
| <b>Next of kin</b>                              |    |    | 80.9 |      |       | 0.87 | 0.65 |    |    | 79.9 |      |       | 0.85 | 0.81 |
| 1. Received next of kin                         | 6  | 33 | 4.3  | 0.80 | -     | 0.77 |      | 7  | 17 | 4.2  | 0.77 | 0.75  | 0.76 |      |
| 2. Arranged for next of kin to be present       | 6  | 33 | 4.2  | 0.91 | -     | 0.77 |      | 7  | 22 | 4.1  | 0.87 | 0.88  | 0.78 |      |
| 3. Arranged for interaction with visitors       | -  | -  | -    | -    | -     | -    |      | 6  | 10 | 4.2  | 0.75 | 0.67  | 0.64 |      |
| <b>Hospital standard</b>                        |    |    | -    |      |       | -    | -    |    |    | 71.3 |      |       | 0.74 | 0.75 |
| 1. Arranged for interaction with other patients | -  | -  | -    | -    | -     | -    |      | 6  | -  | 3.9  | 0.85 | 0.45  | 0.50 |      |
| 2. Physical environment                         | -  | -  | -    | -    | -     | -    |      | 12 | -  | 3.6  | 0.94 | 0.66  | 0.58 |      |
| 3. Food                                         | -  | -  | -    | -    | -     | -    |      | 7  | -  | 4.0  | 0.88 | 0.65  | 0.53 |      |
| 4. Cleanliness                                  | -  | -  | -    | -    | -     | -    |      | 7  | -  | 3.9  | 0.89 | 0.62  | 0.54 |      |

<sup>a</sup> Items are scored 1–5 and scales are scored 0–100, where a higher score represents a better experience.

<sup>b</sup> Intraclass correlation coefficient (ICC).



1  
2  
3 CFAs were applied to examine the hypothesised factor structures. The measurement part  
4 specifies the relationship of the latent to the observed variables, and the structural part of the  
5 models specifies the relationship among the latent variables. First, the six-factor solution of  
6 the outpatient experiences was tested, which revealed that there was a satisfactory model fit to  
7 the data ( $\chi^2=23559.96$ ,  $p<0.001$ ,  $df=458$ ,  $RMSEA=0.091$ ,  $GFI=0.81$ ,  $CFI=0.96$  and  $IFI=0.96$ ).  
8  
9 The results are shown in Figure 1. The exogenous, latent variables were the six factors, and  
10 the endogenous, latent variable was outpatient experiences, introducing a second-order  
11 analysis examining the correlations among the first-order factors to examine predictions on  
12 the endogenous variable. Organisation was the strongest predictor ( $\beta=0.95$ ), but nurse contact  
13 ( $\beta=0.89$ ), doctor contact ( $\beta=0.88$ ) and information ( $\beta=0.76$ ) were also strongly associated  
14 with the endogenous, latent variable. This was also the case for next of kin ( $\beta=0.61$ ) and  
15 patient safety ( $\beta=0.60$ ). Second, the seven-factor solution of the inpatient experiences was  
16 tested, which indicated a slightly better fit ( $\chi^2=26697.60$ ,  $p<0.001$ ,  $df=621$ ,  $RMSEA=0.083$ ,  
17  $GFI=0.81$ ,  $CFI=0.97$  and  $IFI=0.97$ ; Figure 2). The results were consistent with those of the  
18 previous CFA; the inpatient experiences factor was strongly affected by organisation  
19 ( $\beta=0.93$ ), nurse contact ( $\beta=0.89$ ), doctor contact ( $\beta=0.89$ ), information ( $\beta=0.77$ ), next of kin  
20 ( $\beta=0.70$ ) and hospital standard ( $\beta=0.70$ ). The prediction from patient safety was slightly  
21 lower ( $\beta=0.56$ ).  
22  
23  
24  
25  
26  
27  
28  
29  
30  
31  
32  
33  
34  
35  
36  
37  
38  
39  
40  
41  
42  
43  
44  
45  
46  
47  
48  
49  
50  
51  
52  
53  
54  
55  
56  
57  
58  
59  
60

Figure 1: Confirmatory factor analysis (CFA) model for outpatients.

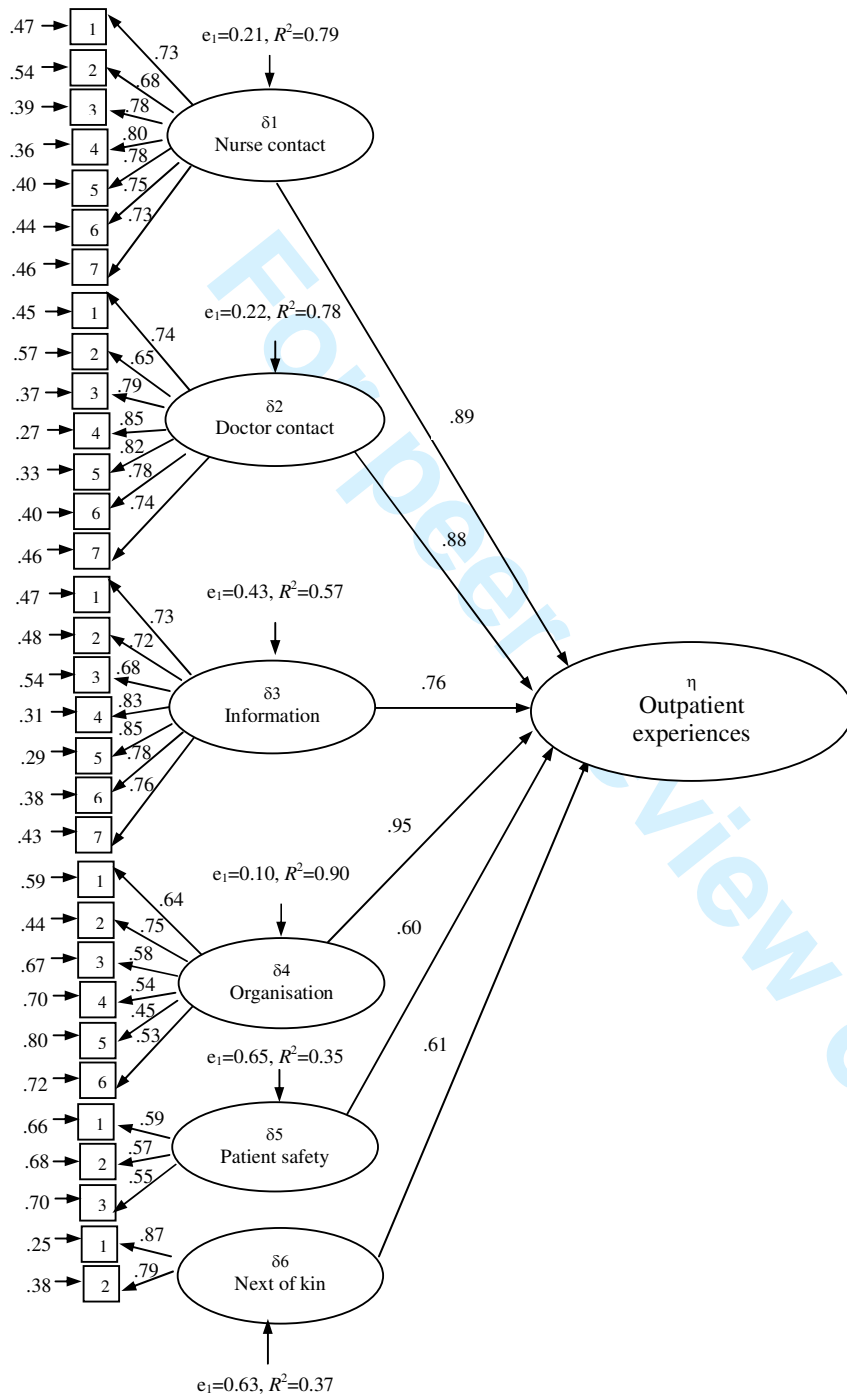

Figure 2: CFA model for inpatients.

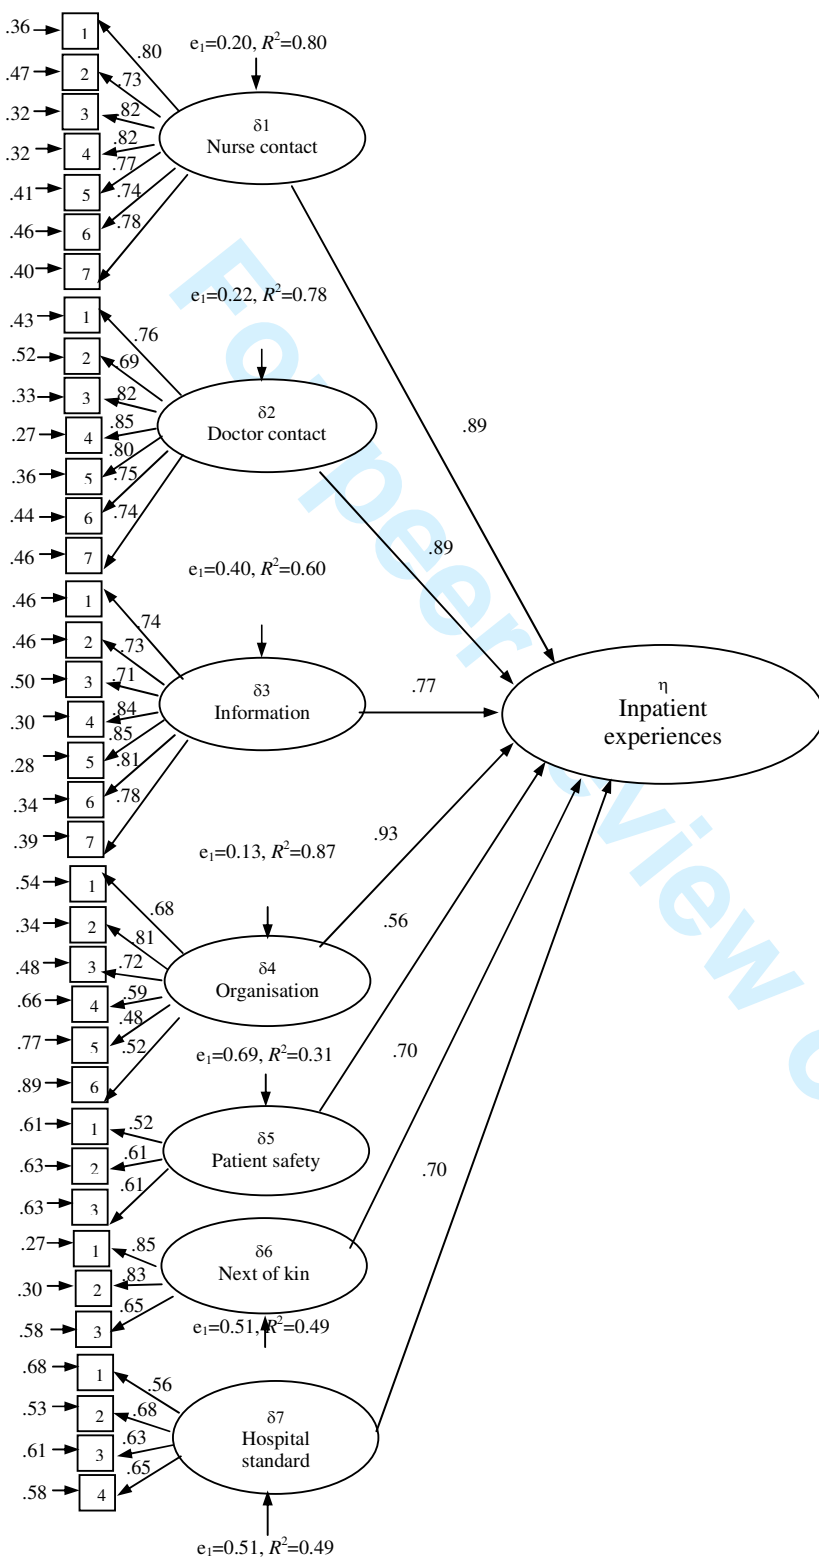

RMSEA=0.083, GFI=0.81, CFI=0.97, IFI=0.97

1  
2  
3 Table 3 gives the results of construct validity testing. The correlations between the scale  
4  
5 scores were all significant at the  $p<0.001$  level (range of correlation coefficients, 0.27–0.77).  
6  
7 The correlations were weakest for the patient safety scales and the other scales, and strongest  
8  
9 for organisation and doctor contact. The correlations between scale scores and other single  
10  
11 items were strongest for the patients' confidence in that the treatment received was the best  
12  
13 possible, with the correlation coefficients ranging from 0.43 to 0.70. Overall satisfaction and  
14  
15 overall experiences were moderately to strongly correlated to the scales (range of correlation  
16  
17 coefficients, 0.24–0.59), with all correlations significant at the  $p<0.001$  level. A significant  
18  
19 correlation was also found between all of the scales and the patients' health status, indicating  
20  
21 that patients with poorer health scored substantially lower on all scales. Age and time since  
22  
23 cancer diagnosis were more weakly correlated with the scales. Results from  $t$ -tests showed  
24  
25 significant but small differences between men and women on four scales. Relative to women,  
26  
27 male outpatients had significantly lower scores on the next of kin scale ( $t=-2.03$ ,  $p<0.05$ );  
28  
29 however, male inpatients had higher scores for nurse contact ( $t=2.79$ ,  $p<0.01$ ), organisation  
30  
31 ( $t=3.78$ ,  $p<0.001$ ) and hospital standard ( $t=6.84$ ,  $p<0.001$ ).  
32  
33  
34  
35  
36  
37  
38  
39  
40  
41  
42  
43  
44  
45  
46  
47  
48  
49  
50  
51  
52  
53  
54  
55  
56  
57  
58  
59  
60

Table 3. Correlations<sup>a</sup> between scale scores and individual items for outpatients and inpatients.

| Scale/item                                              | Outpatients (N=6642) |                     |                     |                     |                     |                     | Inpatients (N=4856) |                    |                    |                     |                     |                     |                     |
|---------------------------------------------------------|----------------------|---------------------|---------------------|---------------------|---------------------|---------------------|---------------------|--------------------|--------------------|---------------------|---------------------|---------------------|---------------------|
|                                                         | Nurse contact        | Doctor contact      | Information         | Organisation        | Patient safety      | Next of kin         | Nurse contact       | Doctor contact     | Information        | Organisation        | Patient safety      | Next of kin         | Hospital standard   |
| Doctor contact                                          | 0.73                 |                     |                     |                     |                     |                     | 0.75                |                    |                    |                     |                     |                     |                     |
| Information                                             | 0.64                 | 0.68                |                     |                     |                     |                     | 0.68                | 0.71               |                    |                     |                     |                     |                     |
| Organisation                                            | 0.68                 | 0.73                | 0.61                |                     |                     |                     | 0.73                | 0.77               | 0.68               |                     |                     |                     |                     |
| Patient safety                                          | 0.38                 | 0.44                | 0.38                | 0.41                |                     |                     | 0.39                | 0.44               | 0.39               | 0.40                |                     |                     |                     |
| Next of kin                                             | 0.63                 | 0.58                | 0.47                | 0.53                | 0.29                |                     | 0.65                | 0.61               | 0.51               | 0.55                | 0.29                |                     |                     |
| Hospital standard                                       | -                    | -                   | -                   | -                   | -                   | -                   | 0.55                | 0.50               | 0.42               | 0.48                | 0.27                | 0.55                |                     |
| Overall satisfaction with service                       | 0.51                 | 0.51                | 0.51                | 0.48                | 0.39                | 0.36                | 0.59                | 0.56               | 0.52               | 0.55                | 0.40                | 0.44                | 0.43                |
| Overall experience with service                         | 0.44                 | 0.43                | 0.45                | 0.44                | 0.24                | 0.35                | 0.52                | 0.45               | 0.46               | 0.48                | 0.26                | 0.41                | 0.39                |
| Confident that treatment provided was the best possible | 0.64                 | 0.69                | 0.57                | 0.61                | 0.43                | 0.54                | 0.70                | 0.69               | 0.58               | 0.65                | 0.43                | 0.57                | 0.48                |
| Health status                                           | -0.17                | -0.21               | -0.22               | -0.16               | -0.18               | -0.10               | -0.23               | -0.22              | -0.24              | -0.22               | -0.18               | -0.13               | -0.17               |
| Age                                                     | -0.04 <sup>**</sup>  | 0.02 <sup>ns</sup>  | -0.11               | -0.01 <sup>ns</sup> | 0.10                | -0.00 <sup>ns</sup> | 0.01 <sup>ns</sup>  | 0.02 <sup>ns</sup> | -0.09              | -0.01 <sup>ns</sup> | 0.11                | 0.01 <sup>ns</sup>  | 0.08                |
| Time since cancer diagnosis                             | -0.02 <sup>ns</sup>  | -0.01 <sup>ns</sup> | -0.01 <sup>ns</sup> | -0.04 <sup>**</sup> | -0.03 <sup>ns</sup> | -0.06 <sup>**</sup> | -0.04 <sup>**</sup> | -0.03 <sup>*</sup> | 0.01 <sup>ns</sup> | -0.05 <sup>**</sup> | -0.01 <sup>ns</sup> | -0.05 <sup>**</sup> | -0.00 <sup>ns</sup> |

<sup>a</sup>Data are Spearman's rank correlations (*r*). All correlations are significant at  $p < 0.001$  except for <sup>\*\*</sup> ( $p < 0.01$ ), <sup>\*</sup> ( $p < 0.05$ ) and <sup>ns</sup> ( $p > 0.05$ ).

The questionnaire also included items about hospital care not directly related to either outpatient or inpatient wards, addressing the hospitals' extra-medical services, cooperation with the primary doctor and other community services, and information on how to manage future problems. The items had high levels of responses in the category "not applicable" (range, 12–63) indicating that they are not relevant to a high proportion of the respondents. Table 4 indicates that the items have lower mean scores than those included in the other factors, ranging from 2.5 to 3.4. Factor analysis revealed a one-factor solution accounting for 57% of the variance of the scores (Table 4). The factor loadings ranged from 0.56 to 0.79, the item-total correlation coefficients ranged from 0.52 to 0.71 and the results from reliability analysis yielded a Cronbach's alpha of 0.85. The test-retest correlation coefficient for this scale was 0.78.

Table 4. Descriptive statistics<sup>a</sup>, factor loadings and internal consistency for all patients.

| Scale/item                                              | All patients (N=7212) |                    |                   |      |                 |                                                     |                                              |
|---------------------------------------------------------|-----------------------|--------------------|-------------------|------|-----------------|-----------------------------------------------------|----------------------------------------------|
|                                                         | Missing (%)           | Does not apply (%) | Mean <sup>a</sup> | SD   | Factor loadings | Cronbach's alpha/item-total correlation coefficient | Test-retest reliability <sup>b</sup> (n=229) |
| <b>Extra-medical services, information, cooperation</b> |                       |                    | <b>49.2</b>       |      |                 | <b>0.85</b>                                         | <b>0.78</b>                                  |
| Hospital extra-medical services                         | 6                     | 45                 | 2.5               | 1.35 | 0.65            | 0.60                                                |                                              |
| Hospital cooperation with primary doctor                | 6                     | 16                 | 3.4               | 1.15 | 0.56            | 0.52                                                |                                              |
| Hospital cooperation with community services            | 7                     | 63                 | 2.8               | 1.37 | 0.64            | 0.60                                                |                                              |
| Information about future problems                       | 5                     | 12                 | 3.2               | 1.22 | 0.74            | 0.65                                                |                                              |
| Information about managing potential relapse            | 6                     | 19                 | 2.9               | 1.30 | 0.79            | 0.69                                                |                                              |
| Information about rehabilitation                        | 6                     | 40                 | 2.5               | 1.31 | 0.79            | 0.71                                                |                                              |

<sup>a</sup> Items are scored 1–5 and scales are scored 0–100, where a higher score represents a better experience.

<sup>b</sup> ICC.

The scale was not correlated significantly with time since cancer diagnosis, but patients with poorer health reported significantly more negative experiences, as did older patients and women (see Table 5). Results from *t*-tests showed that male patients reported significantly more positive experiences than did female patients ( $t=3.54$ ,  $p<0.001$ ).

Table 5. Correlations<sup>a</sup> between scale score and individual items for all patients.

| Scale/item                  | All patients (N=7212)<br>Extra-medical services,<br>information, cooperation |
|-----------------------------|------------------------------------------------------------------------------|
| Health status               | -0.23                                                                        |
| Age                         | -0.11                                                                        |
| Time since cancer diagnosis | -0.02 <sup>ns</sup>                                                          |

<sup>a</sup>All correlations are significant at  $p < 0.001$  except for ns ( $p > 0.05$ ).

## DISCUSSION

This study was part of the first national survey undertaken in Norway to assess cancer patients' experiences with somatic hospitals. The development of the CPEQ followed a review of the literature, interviews with cancer patients, and consultation with an expert group of professionals and researchers. The resulting questionnaire underwent a thorough process of piloting and testing for data quality, reliability and construct validity, as recommended for evaluating such questionnaires. The CPEQ addresses broad domains of cancer-related care at somatic hospitals, rather than focusing on specific treatments, cancer types or specific professionals involved in care of the patients.

The results from the survey can be used as national quality indicators in Norway and were designed to inform patient choice and for quality improvement. The CPEQ was designed specifically for use with cancer patients attending somatic hospitals, and was assumed to increase content validity from a patient perspective as well as allowing hospital staff to investigate in detail the extent to which their service meets the needs of their patients.

Questionnaires that assess specific aspects of care allow the domains where patients have poorer experiences to be identified and potentially improved.

Satisfactory evidence of internal consistency, test-retest reliability and construct validity was obtained, indicating that the CPEQ can be considered a high-quality instrument. The results of

1  
2  
3 the EFAs and tests of internal consistency provided empirical support for the scales, and  
4  
5 confirmed that both outpatient and inpatient experiences are multidimensional concepts.  
6  
7 CFAs were supportive of the structures suggested by EFAs. There is evidence for construct  
8  
9 validity of the questionnaire following the application of hypotheses based on previous  
10  
11 research findings and theory.[7, 8–19] The results also provide support for the longitudinal  
12  
13 temporal stability of the measure. High agreement between scores administered  
14  
15 approximately 1 week apart provided good evidence of the test-retest reliability of the CPEQ.  
16  
17  
18  
19

20  
21 Some limitations of the study should be considered. The levels of missing data suggest that  
22  
23 the measure is acceptable to patients. However, some of the included items were only relevant  
24  
25 for some of the respondents. It may be possible to extract a shorter version of the CPEQ with  
26  
27 fewer questions without sacrificing the psychometric qualities of the measure, but this task  
28  
29 was beyond the scope of this study. Furthermore, the response rate (52%) means that almost  
30  
31 half of the patients failed to respond; however, it was relatively high compared with previous  
32  
33 user experience surveys carried out in Norway,[8–19] and findings from some of these  
34  
35 surveys have shown that the low response rates have not caused serious bias.[15, 28–31]  
36  
37  
38  
39

40  
41 Consistent with previous findings,[32–34] some skewing towards positive assessment was  
42  
43 identified. Whether this reflects truly positive experiences or low expectations is  
44  
45 unknown.[35] As for any study based on self-reports, social desirability bias and recall bias  
46  
47 may also have affected the results. Respondents may introduce bias in several ways, for  
48  
49 example by giving socially desirable responses as a result of cognitive consistency pressure  
50  
51 (making ratings congruent with their continuing use of the service) and through acquiescent  
52  
53 response sets (a tendency always to agree or reply positively).[4] However, respondents have  
54  
55 been shown to give more positive and socially desirable responses in interview surveys than  
56  
57  
58  
59  
60



1  
2  
3 in self-administered surveys.[36] Moreover, it is assumed that recall bias is less likely when  
4  
5 asking about the overall experience rather than about a specific visit or hospitalisation.  
6  
7

8  
9 Instead of developing a cancer-specific questionnaire, one of the existing generic  
10  
11 questionnaires could potentially have been used in the national survey, such as the Patient  
12  
13 Experience Questionnaire.[8] This would have reduced the resource requirements, and also  
14  
15 has some empirical support. One study compared the measurement properties and the  
16  
17 patients' evaluation of one generic and two psychiatric-specific patient satisfaction  
18  
19 questionnaires in a sample of psychiatric patients. The results indicated that no single  
20  
21 instrument was superior in either respect.[37] Another study identified ten generic core items  
22  
23 covering major dimensions of experiences that patients across a range of specialist health-care  
24  
25 services report to be important.[38] A short, generic questionnaire might be expected to give a  
26  
27 higher response rate and better comparability than the CPEQ, but would not be suited for the  
28  
29 purpose of a national survey in Norway. The purpose of the present study was a broad  
30  
31 assessment of hospital cancer care. Furthermore, content validity is better for a cancer-  
32  
33 specific questionnaire, since all activities are directed against securing validity for cancer  
34  
35 patients, rather than to patients in general. Naturally, a national survey with a narrower focus  
36  
37 could have used a generic and perhaps shorter questionnaire.  
38  
39  
40  
41  
42  
43  
44

45 Results from the national patient experience survey program in Norway are used to develop  
46  
47 quality indicators presented both to the public and to the responsible institutions. Public use  
48  
49 includes an Internet site for free hospital choice in Norway. Research has shown that patients  
50  
51 have difficulty understanding quality information,[39] and that "less is more" in this  
52  
53 respect.[40] Therefore, an aggregated and overall measure of experiences with the hospitals  
54  
55 seems appropriate in the context of presenting information to patients. Further research is  
56  
57  
58  
59  
60

1  
2  
3 needed to determine how to construct a composite score, including how to weight each of the  
4  
5 underlying subdimensions. More specific results are called for when reporting information to  
6  
7 health providers with the aim of evaluating and improving the quality of care.[32]

8  
9  
10 Consequently, aggregated scores on the 13 CPEQ subdimensions might be a useful  
11  
12 supplement when reporting results to the responsible hospitals.

13  
14  
15  
16 Comparing the contribution at the organisational and individual levels is relevant for  
17  
18 comparisons of hospitals based on patient evaluations. The approach for institutional  
19  
20 benchmarking in the national survey program involves developing an appropriate case-mix  
21  
22 model and correct for multiple comparisons in statistical testing. Another emerging approach  
23  
24 is to use multilevel analysis to estimate the amount of variation in scores that can be explained  
25  
26 by levels above the individual level.[41] A previous study of patient experiences found that  
27  
28 only a small part of the variation is attributable to the organisational level.[42] Future studies  
29  
30 based on the CPEQ should explore this topic further in order to elucidate the usefulness of the  
31  
32 CPEQ as a basis for quality indicators at the hospital level. This also includes research on  
33  
34 hospital-level reliability, which is based on the theory that patients who are treated at the same  
35  
36 hospital should agree regarding their assessments of that hospital. The larger the ratio of  
37  
38 between- to within-hospital variation in the scores, and the larger the number of respondents,  
39  
40 the more precise will be the measurement of differences between hospitals, and thus the  
41  
42 greater the reliability of the scores.[43]

43  
44  
45  
46  
47  
48  
49 Patient satisfaction questionnaires have been criticised for insufficient knowledge of their  
50  
51 reliability and validity in psychometric testing.[3] The strengths of the present study include  
52  
53 the psychometric assessment of the CPEQ following a national survey, including data quality,  
54  
55 dimensionality, internal consistency and construct validity. The scale should prove useful for  
56  
57  
58  
59  
60

1  
2  
3 evaluating cancer patients' experiences with hospitals in Norway and in similar settings in  
4  
5 other countries, and includes the most important aspects regarding both inpatient and  
6  
7 outpatient hospital care from the patient perspective.  
8  
9

## 10 11 **Conclusions**

12  
13 Valid and reliable measures for the measurement of cancer patients' experiences with  
14  
15 hospitals are crucial if the data are to be used in quality improvement, business control and by  
16  
17 both patients and the general public. The CPEQ includes the most important aspects of cancer  
18  
19 patients' experiences with somatic hospitals, from the perspective of the cancer patients  
20  
21 themselves. The present study has provided strong evidence for the high data quality, internal  
22  
23 consistency, content and construct validity of this questionnaire. The questionnaire is  
24  
25 recommended for future applications designed to assess cancer patients' experiences of both  
26  
27 inpatient and outpatient care in Norway and similar settings in other countries. Further  
28  
29 investigation of the explanatory characteristics of variations in cancer patients' experience  
30  
31 with health care is warranted.  
32  
33  
34  
35  
36  
37  
38  
39  
40  
41  
42  
43  
44  
45  
46  
47  
48  
49  
50  
51  
52  
53  
54  
55  
56  
57  
58  
59  
60

## Acknowledgements

The authors thank Tomislav Dimoski at the Norwegian Knowledge Centre for Health Services, Oslo, Norway, for developing the software necessary for gathering data from the hospitals, and for conducting the data collection and quality assurance of data. We also thank Saga Høgheim and Marit Skarpaas, who carried out most of the practical tasks relating to data collection, as well as members of the expert group that contributed to the development of the questionnaire and survey design.

## Competing interests

The authors declare that they have no competing interests.

## Funding

The survey was funded by the Norwegian Ministry of Health.

## Authors' contributions

All authors contributed to the design of the questionnaire and survey. H.I.I. conducted the analysis and drafted the manuscript. H.I.I. and O.H. were involved in the data acquisition. All authors have made significant contributions by critically reviewing the manuscript and have read and approved the final version.

**REFERENCES**

1. Kelly E, Hurst J. Health Care Quality Indicators Project: Conceptual Framework Paper. OECD Health Working Papers 23-2006. Paris: OECD, 2006.
2. Murray CJ, Frenk J. A framework for assessing the performance of health systems. *Bull World Health Organ* 2000;**78**(6):717–31.
3. Bjertnæs ØA, Sjetne IS, Iversen HH. Overall patient satisfaction with hospitals: effects of patient-reported experiences and fulfilment of expectations. *BMJ Qual Saf* 2012;**21**(1):39–46.
4. Crow R, Gage H, Hampson S, et al. The measurement of satisfaction with healthcare: implications for practice from a systematic review of the literature. *Health Technol Assess* 2002;**6**(32):1–244.
5. Barbosa CD, Balp MM, Kulich K, et al. A literature review to explore the link between treatment satisfaction and adherence, compliance, and persistence. *Patient Prefer Adherence* 2012;**6**:39–48.
6. Sitzia J. How valid and reliable are patient satisfaction data? An analysis of 195 studies. *Int J Qual Health Care* 1999;**11**(4):319–28.
7. Cleary P, Edgman-Levitan S, McMullen W, et al. The relationship between reported problems and summary evaluations of hospital care. *QRB Qual Rev Bull* 1992; **18**(2):53–9.
8. Pettersen KI, Veenstra M, Guldvog B, et al. The Patient Experiences Questionnaire: development, validity and reliability. *Int J Qual Health Care* 2004;**16**(6):453–63.
9. Garratt AM, Bjertnæs ØA, Krogstad U, et al. The OutPatient Experiences Questionnaire (OPEQ): data quality, reliability and validity in patients attending 52 Norwegian hospitals. *Qual Saf Health Care* 2005;**14**(6):433–7.

10. Garratt AM, Danielsen K, Bjertnæs ØA, et al. PIPEQ – a method for measurement of user satisfaction in mental health services. *Tidsskr Nor Laegeforen* 2006;**126**(11):1478–80.
11. Garratt AM, Bjørngaard JH, Dahle KA, et al. The Psychiatric Out-Patient Experiences Questionnaire (POPEQ): data quality, reliability, and validity in patients attending 90 Norwegian clinics. *Nord J Psychiatry* 2006;**60**(2):89–96.
12. Garratt AM, Bjertnæs ØA, Barlinn J. Parent experiences of paediatric care (PEPC) questionnaire: reliability and validity following a national survey. *Acta Paediatr* 2007;**96**(2):246–52.
13. Bjertnæs ØA, Garratt AM, Nessa J. The GPs' Experiences Questionnaire (GPEQ): reliability and validity following a national survey to assess GPs' views of district psychiatric services. *Fam Pract* 2007;**24**(4):336–42.
14. Bjertnæs ØA, Garratt A, Ruud T, et al. The General Practitioner Experiences Questionnaire (GPEQ): validity and reliability following the inclusion of new accessibility items. *Fam Pract* 2010;**27**(5):513–9.
15. Garratt AG, Bjertnæs ØA, Holmboe O, et al. Parent Experiences Questionnaire for Child and Adolescent Mental Health Services (PEQ-CAMHS): reliability and validity following a national survey. *Child Adolesc Psychiatry Ment Health* 2011;**5**:18.
16. Garratt AM, Danielsen K, Forland O, et al. The Patient Experiences Questionnaire for Out-of-Hours Care (PEQ-OHC): data quality, reliability, and validity. *Scand J Prim Health Care* 2010;**28**(2):95–101.
17. Oltedal S, Garratt A, Bjertnæs ØA, et al. The NORPEQ patient experiences questionnaire: data quality, internal consistency and validity following a Norwegian inpatient survey. *Scand J Public Health* 2007;**35**(5):540–7.

- 1  
2  
3 18. Bjertnæs ØA, Lyngstad I, Malterud K, et al. The Norwegian EUROPEP questionnaire for  
4 patient evaluation of general practice: data quality, reliability and construct validity. *Fam*  
5 *Pract* 2011;**28**(3):342–9.  
6  
7  
8  
9  
10 19. Olsen RV, Garratt AM, Iversen HH, et al. Rasch analysis of the Psychiatric Out-Patient  
11 Experiences Questionnaire (POPEQ). *BMC Health Serv Res* 2010;**10**:282.  
12  
13  
14 20. Brédart A, Morvan E, Savignoni A, et al. Respiratory Gated Radiotherapy Study Group  
15 Stic-Rar 2003. Patient's perception of care quality during radiotherapy sessions using  
16 respiratory gating techniques: validation of a specific questionnaire. *Cancer Invest.*  
17  
18 2011;**29**(2):145–52.  
19  
20  
21  
22 21. Department of Health (2002) National Survey: Cancer Patients.  
23 <http://www.dh.gov.uk/en/Publicationsandstatistics/PublishedSurvey/NationalsurveyofNH>  
24 [Spatients/Nationalsurveycancer/index.htm](http://www.dh.gov.uk/en/Publicationsandstatistics/PublishedSurvey/NationalsurveyofNH) (Last accessed 19 Dec 2011).  
25  
26  
27  
28  
29 22. National Audit Office (2005) Tackling Cancer: Improving the Patient Journey.  
30 Department of Health. The Stationery Office: London.  
31  
32 [http://www.nao.org.uk/publications/0405/tackling\\_cancer.aspx](http://www.nao.org.uk/publications/0405/tackling_cancer.aspx) (Last accessed 19 Dec  
33 2011).  
34  
35  
36  
37 23. Gustafsson JE, Stahl PA. STREAMS User's Guide. Version 2.5 for Windows. Mölndal,  
38 Sweden: Multivariate Ware; 2000.  
39  
40  
41  
42 24. Nunnally JC, Bernstein IH. Psychometric Theory, 3rd edn. New York: McGraw-Hill;  
43 1994.  
44  
45  
46  
47 25. Kline P: The Handbook of Psychological Testing. London: Routledge; 1993.  
48  
49  
50 26. Hair J, Anderson RE, Tatham RL, et al. Multivariate Data ANALYSIS with Readings. 4th  
51 edn. Englewood Cliffs, New Jersey: Prentice-Hall international; 1995.  
52  
53  
54 27. Jöreskog KG, Sörbom D. LISREL 8. Structural Equation Modelling with the SIMPLIS  
55 Command Language. Hillsdale NJ: Erlbaum; 1993.  
56  
57  
58  
59  
60

- 1
- 2
- 3 28. Bjertnæs ØA, Garratt AM, Johannessen JO. Data collection methods and results in users
- 4 surveys in mental health care. *Tidsskr Nor Laegeforen* 2006;**126**(11):1481–3.
- 5
- 6
- 7 29. Bjertnæs ØA, Garratt A, Botten G. Nonresponse bias and cost-effectiveness in a
- 8 Norwegian survey of family physicians. *Eval Health Prof* 2008;**31**(1):65–80.
- 9
- 10
- 11 30. Bjertnæs ØA, Garratt A, Iversen H, et al. The association between GP and patient ratings
- 12 of quality of care at outpatient clinics. *Fam Pract* 2009;**26**(5):384–90.
- 13
- 14
- 15 31. Guldvog B, Hofoss D, Pettersen KI, et al. PS-RESKVA (Patient Satisfaction, Results and
- 16 Quality) – patient satisfaction in hospitals. *Tidsskr Nor Laegeforen* 1998;**118**(3):386–91.
- 17
- 18
- 19
- 20 32. Jenkinson C, Coulter A, Bruster S, et al. Patients' experiences and satisfaction with health
- 21 care: results of a questionnaire study of specific aspects of care. *Qual Saf Health Care*
- 22 2002;**11**(4):335–9.
- 23
- 24
- 25 33. Ware JE Jr, Hays RD. Methods for measuring patient satisfaction with specific medical
- 26 encounters. *Med Care* 1988;**26**(4):393–402.
- 27
- 28
- 29 34. Williams B, Coyle J, Healy D. The meaning of patient satisfaction: an explanation of high
- 30 reported levels. *Soc Sci Med* 1998;**47**(9):1351–9.
- 31
- 32
- 33 35. Sitzia J, Wood N. Patient satisfaction: a review of issues and concepts. *Soc Sci Med*
- 34 1997;**45**(12):1829–43.
- 35
- 36
- 37 36. Tourangeau R, Smith TW. Asking sensitive questions: the impact of data collection mode,
- 38 question format, and question context. *Pub Opin Quart* 1996;**60**(2):275–304.
- 39
- 40
- 41 37. Peytremann-Bridevaux I, Scherer F, Peer L, et al. Satisfaction of patients hospitalised in
- 42 psychiatric hospitals: a randomised comparison of two psychiatric-specific and one
- 43 generic satisfaction questionnaires. *BMC Health Serv Res* 2006;**6**:108.
- 44
- 45
- 46 38. Sjetne IS, Bjertnæs ØA, Olsen RV, et al. The Generic Short Patient Experiences
- 47 Questionnaire (GSPEQ): identification of core items from a survey in Norway. *BMC*
- 48 *Health Serv Res* 2011;**11**:88.
- 49
- 50
- 51
- 52
- 53
- 54
- 55
- 56
- 57
- 58
- 59
- 60



- 1  
2  
3 39. Faber M, Bosch M, Wollersheim H et al. Public reporting in health care: how do  
4 consumers use quality-of-care information? A systematic review. *Med Care*  
5 2009;**47**(1):1–8.  
6  
7  
8  
9  
10 40. Peters E, Dieckmann N, Dixon A, et al. Less is more in presenting quality information to  
11 consumers. *Med Care Res Rev* 2007;**64**(2):169–90.  
12  
13  
14 41. Bjertnæs ØA, Garratt A, Ruud T. Family physicians' experiences with community mental  
15 health centers: a multilevel analysis. *Psychiatr Serv* 2008;**59**(8):864–70.  
16  
17  
18 42. Sjetne IS, Veenstra M, Stavem K. The effect of hospital size and teaching status on patient  
19 experiences with hospital care: a multilevel analysis. *Med Care* 2007;**45**(3):252–8.  
20  
21  
22 43. Keller S, O'Malley AJ, Hays RD, et al. Methods used to streamline the CAHPS Hospital  
23 Survey. *Health Serv Res* 2005;**40**(6 Pt 2):2057–77.  
24  
25  
26  
27  
28  
29  
30  
31  
32  
33  
34  
35  
36  
37  
38  
39  
40  
41  
42  
43  
44  
45  
46  
47  
48  
49  
50  
51  
52  
53  
54  
55  
56  
57  
58  
59  
60



**The Cancer Patient Experiences Questionnaire (CPEQ):  
reliability and construct validity following a national survey  
to assess hospital cancer care from the patient perspective**

|                                 |                                                                                                                                                                                                                           |
|---------------------------------|---------------------------------------------------------------------------------------------------------------------------------------------------------------------------------------------------------------------------|
| Journal:                        | <i>BMJ Open</i>                                                                                                                                                                                                           |
| Manuscript ID:                  | bmjopen-2012-001437.R1                                                                                                                                                                                                    |
| Article Type:                   | Research                                                                                                                                                                                                                  |
| Date Submitted by the Author:   | 04-Jul-2012                                                                                                                                                                                                               |
| Complete List of Authors:       | Iversen, Hilde; The Norwegian Knowledge Centre for the Health Services , Holmboe, Olaf; The Norwegian Knowledge Centre for the Health Services, Bjertnæs, Øyvind; The Norwegian Knowledge Centre for the Health Services, |
| <b>Primary Subject Heading</b>: | Health services research                                                                                                                                                                                                  |
| Secondary Subject Heading:      | Research methods                                                                                                                                                                                                          |
| Keywords:                       | Patient satisfaction, Cancer, Validity and reliability                                                                                                                                                                    |
|                                 |                                                                                                                                                                                                                           |

SCHOLARONE™  
Manuscripts

1  
2  
3 **The Cancer Patient Experiences Questionnaire (CPEQ): reliability and construct**  
4 **validity following a national survey to assess hospital cancer care from the patient**  
5 **perspective**  
6  
7  
8  
9

10  
11 **Hilde Hestad Iversen<sup>§</sup>, Olaf Holmboe, Øyvind Andresen Bjertnæs**  
12  
13

14  
15  
16 Department for Quality Measurement and Patient Safety

17  
18 Norwegian Knowledge Centre for the Health Services

19  
20 PO Box 7004 St. Olavs plass,

21  
22 0130 Oslo

23  
24 Norway

25  
26  
27  
28  
29 <sup>§</sup>Corresponding author:

30  
31 Telephone: +47-46400425

32  
33 Fax: +47-23255010

34  
35 HII: [hii@nokc.no](mailto:hii@nokc.no)  
36  
37  
38  
39  
40  
41  
42  
43  
44  
45  
46  
47  
48

49  
50 Keywords: Patient satisfaction, Cancer, Survey, Reliability and validity, Confirmatory factor  
51 analysis  
52  
53  
54

55  
56 3965 words  
57  
58  
59  
60

## ABSTRACT

### Objectives

Patient experience questionnaires have been criticised due to the lack of supporting psychometric evidence. The objective of this study was to describe the development and psychometric evaluation of the Cancer Patient Experiences Questionnaire (CPEQ) in Norway.

### Design

Questionnaire development was based on a literature review of existing questionnaires, patient interviews, expert-group consultations, pretesting of questionnaire items and a national survey. Psychometric evaluation included exploratory and confirmatory factor analysis, and tests of internal consistency reliability and test-retest reliability.

### Setting

Data were collected using a postal survey of cancer patients attending 54 hospitals in all 4 health regions. The subjects were 14,227 adult cancer patients who had attended an outpatient clinic or who had been discharged from an inpatient ward. Patients with all types of cancer were included. Data quality, internal consistency reliability and construct validity were assessed.

### Results

Of the 13,846 patients who received the CPEQ, 7212 (52%) responded. Exploratory factor analysis identified six scales of outpatient experiences relating to nurse contact, doctor contact, information, organisation, patient safety and next of kin, and seven scales of inpatient experiences, with the addition of hospital standard to the aforementioned scales. All but two

1  
2  
3 of the scales met the criterion of 0.70 for Cronbach's alpha testing, and test-retest correlations  
4  
5 ranged from 0.57 to 0.85. Confirmatory factor analysis supported the interpretation of six and  
6  
7 seven scales for outpatients and inpatients, respectively. Statistically significant associations  
8  
9 based on explicit hypotheses provided evidence for the construct validity of the scales. One  
10  
11 additional scale measuring the hospital level was identified ( $\alpha=0.85$ ).  
12  
13

### 14 15 16 **Conclusions**

17  
18 The CPEQ is a self-report instrument that includes the most important aspects of patient  
19  
20 experiences with cancer care at hospitals. The instrument was tested following a national  
21  
22 survey in Norway; good evidence is provided herein for the internal consistency reliability,  
23  
24 test-retest reliability and construct validity.  
25  
26  
27  
28  
29  
30  
31  
32  
33  
34  
35  
36  
37  
38  
39  
40  
41  
42  
43  
44  
45  
46  
47  
48  
49  
50  
51  
52  
53  
54  
55  
56  
57  
58  
59  
60

## ARTICLE SUMMARY

### Article focus

- To describe the development and evaluation of the Cancer Patient Experiences Questionnaire (CPEQ).
- Data quality, internal consistency reliability and construct validity were assessed.

### Key messages

- Patient satisfaction questionnaires have generally been criticised due to the lack of supporting psychometric evidence, including reliability and validity data.
- Valid and reliable measures for the measurement of cancer patients' experiences with hospitals are crucial if the data are to be used in quality improvement, business control and by both patients and the general public.

### Strengths and limitations of this study

- The strengths of the present study include the psychometric assessment of the CPEQ following a national survey, including data quality, dimensionality, internal consistency and construct validity.
- The scale should prove useful for evaluating cancer patients' experiences with hospitals in Norway and in similar settings in other countries, and includes the most important aspects regarding both inpatient and outpatient hospital care from the patient perspective.
- Further investigation of the explanatory characteristics of variations in cancer patients' experience with health care is warranted.

## INTRODUCTION

The measurement of patient experiences is now recognised as an important part of health-care performance evaluation. Patient experiences are included as one of three core quality dimensions in the Organisation for Economic Cooperation and Development quality indicator framework,[1] and are central to the framework of the World Health Organisation for assessing the performance of health systems.[2] Several studies have shown that patient experiences are positively related to patient satisfaction [3, 4] and that patient satisfaction is positively associated with compliance [5] and health outcomes.[4] Eliciting feedback from patients helps health-care providers to identify potential areas for improvement, which in turn can increase the quality of health care.

The acquisition of valid information requires patient experiences to be measured using rigorously developed and validated tools. Patient satisfaction questionnaires have generally been criticised due to the lack of supporting psychometric evidence, including reliability and validity data. A review of 195 patient satisfaction papers published in 1994 found that the satisfaction instruments presented little evidence of reliability or validity,[6] casting doubt on the credibility of the resultant findings. Furthermore, questionnaires that ask patients to rate their care in terms of how satisfied they are tend to elicit very positive ratings.[4] A more valid approach is to ask patients to report in detail on their experiences by asking them specific questions about certain processes and events; this will provide results that can be easily interpreted and acted upon.[7]

Norway has a national patient experience survey program that is run by the Norwegian Knowledge Centre for the Health Services. The purpose of the program is to systematically measure user experiences with health care, to provide data for quality improvement, business

1  
2  
3 control, hospital choice and public accountability. Due to the aforementioned problems that  
4  
5 arise when attempts are made to measure satisfaction, the instruments focus on experiences of  
6  
7 the healthcare delivery, not satisfaction. In 2007, the Ministry of Health in Norway decided to  
8  
9 measure cancer patients' experiences with hospitals. The Norwegian Knowledge Centre for  
10  
11 the Health Services has developed and validated several generic instruments to be used in  
12  
13 national patient experience surveys,[8–19] but none specifically for cancer patients. Ensuring  
14  
15 the sensitivity of the instrument and detecting changes that are significant for the patient  
16  
17 requires instruments specific to the study objective as well as the population of interest to be  
18  
19 developed.[20] A review of the literature was conducted to determine whether there was an  
20  
21 instrument that included multidimensional scales including different aspects of cancer patient  
22  
23 experiences. Two national surveys of patients' experiences of cancer services have been  
24  
25 carried out in the UK: the first in 1999–2000 by the National Patient Survey Programme [21]  
26  
27 and the second in 2004 by the National Audit Office.[22] However, these surveys included  
28  
29 only six types of cancer: breast, colorectal, lung, ovarian, prostate and non-Hodgkin's  
30  
31 lymphoma. Other questionnaires identified in the review typically addressed quality of life, or  
32  
33 involved specific cancer types, treatments, services or clinical staff; no measures appropriate  
34  
35 for all cancer types, including assessment of inpatient and outpatient cancer care, were  
36  
37 identified. Consequently, the literature review identified shortcomings with existing measures,  
38  
39 and it was decided to develop a new instrument to measure the experiences of hospital care of  
40  
41 both inpatients and outpatients that could be used in a future national survey in Norway.  
42  
43  
44  
45  
46  
47  
48

49 This paper describes the development and evaluation of the Cancer Patient Experiences  
50  
51 Questionnaire (CPEQ). This tool was designed for application in a national survey of adult  
52  
53 cancer patients, whereby the results are published in the form of reports for the public, the  
54  
55  
56  
57  
58  
59  
60



1  
2  
3 government and individual health-care units as a basis for national surveillance, quality  
4  
5 improvement and hospital choice.  
6  
7

## 8 9 **METHODS**

### 10 **Questionnaire development**

11  
12 The questionnaire was developed based on the findings of a literature review of  
13  
14 questionnaires aimed to determine cancer patients' experiences with hospitals, semi-  
15  
16 structured interviews with 13 cancer patients, and focus groups of experts including clinicians  
17  
18 and representatives for cancer patient organisations. This process was designed to ensure  
19  
20 content validity and that the questionnaire addresses important aspects of cancer patient  
21  
22 experiences of care, and to establish a model for including participants in the survey. The  
23  
24 development of the questionnaire also followed previous work in the identification of  
25  
26 domains and items of relevance for the patients.[8–19] We tested the questionnaire by  
27  
28 performing cognitive interviews with 12 cancer patients and a pilot study of 953 cancer  
29  
30 patients at a single hospital. The cognitive interviews and the pilot study suggested minor  
31  
32 changes to the questionnaire, which were discussed within the group of experts before  
33  
34 finalisation.  
35  
36  
37  
38  
39

40  
41  
42 We asked the patients about their overall experiences with a specific hospital. The  
43  
44 questionnaire was divided into separate sections for inpatients and outpatients, consisting  
45  
46 mainly of the same questions, except for six questions included in the inpatient section about  
47  
48 hospital standards and waiting time. The questionnaire also included items concerning aspects  
49  
50 of care irrespective of out- or inpatient settings, as well as sociodemographic and health-status  
51  
52 questions. The final questionnaire comprised 127 items. **Items relating to experiences of care**  
53  
54 **had a five-point scale that range from “not at all” (1) to “a very large extent” (5). Negative**  
55  
56  
57  
58  
59  
60

1  
2  
3 items were reverse coded, and a higher score represent a better experience for all items. Scales  
4  
5 were transformed to scores ranging from 0 to 100 where 100 is the best possible. In this study  
6  
7 we enquired about experiences that do not apply to all patients but which are considered  
8  
9 important to the relevant patients. Consequently, the levels of missing data were expected to  
10  
11 reflect patients being at different stages of cancer treatment and having varying levels of  
12  
13 experience with hospital care.  
14  
15

### 16 17 18 **Data collection** 19

20  
21 The questionnaire was mailed to 14,227 patients with all types of cancer aged 16 years or  
22  
23 older who had at least one outpatient appointment or a hospital stay at a Norwegian hospital  
24  
25 from 20 September to 10 December 2009. A maximum of 400 patients from each of the 54  
26  
27 hospitals was included; 400 patients were selected randomly from hospitals with more than  
28  
29 400 eligible patients. Power calculations have been conducted at the hospital level, resulting  
30  
31 in an appropriate sample size of 400 for each hospital. When presenting population estimates,  
32  
33 individual weights are used to adjust for non-response. These are also related to the size of the  
34  
35 hospital populations so that results at higher levels (health enterprise, regions and the nation)  
36  
37 take into account differences in hospital size. The hospitals had the opportunity to exclude  
38  
39 patients who were not considered applicable to participate in a survey, and the patients  
40  
41 themselves could withdraw from the survey at any time by contacting the hospital. Checks  
42  
43 were undertaken to ensure that patients were not sent more than one questionnaire, and the  
44  
45 first hospital episode with a cancer registration was taken as the episode to use in the survey  
46  
47 sample for patients who appeared on the lists more than once. Units for palliative care and  
48  
49 birth and maternity departments were excluded from the survey. The questionnaires were  
50  
51 mailed to the patients by the end of January to mid-May 2010. Non-responders were sent one  
52  
53 reminder after 3 weeks. We also mailed a retest questionnaire to 291 consenting patients  
54  
55  
56  
57  
58  
59  
60

1  
2  
3 approximately 1 week after their first reply for the purpose of assessing test-retest reliability.

4  
5 After the completion of data collection the patient contact information was deleted and the  
6  
7 hospitals transferred the demographic, clinical and administrative data, which were merged  
8  
9 with the patients' responses.  
10

11  
12  
13  
14 The survey was approved by the Norwegian Regional Committee for Medical Research  
15  
16 Ethics, the Data Inspectorate, and the Ministry of Health and Care Services.  
17  
18  
19

### 20 21 **Statistical analysis**

22  
23 Most statistical analyses were carried out using SPSS version 15.0. Confirmatory factor  
24  
25 analyses (CFAs) were conducted using the linear structural relation (LISREL) analysis  
26  
27 program. STREAMS (Structural Equation Modelling Made Simple) offers an interface to the  
28  
29 LISREL program and was used as a support.[23]  
30  
31

32  
33  
34 Separate exploratory factor analyses (EFAs) were carried out for outpatients and inpatients  
35  
36 using principal axis factoring. We expected some correlations among the factors and chose  
37  
38 oblique rotation (promax). The criterion for the number of factors to be rotated was  
39  
40 eigenvalues greater than 1, and items with factor loadings lower than 0.4 were excluded.  
41  
42  
43  
44

45 Cronbach's alpha coefficient was calculated to determine the internal consistency of the  
46  
47 scales. An alpha value greater than 0.70 is considered satisfactory.[24, 25] Internal  
48  
49 consistency was also assessed by item-total correlation, measuring the strength of the  
50  
51 association between an individual item and the total score of the remainder of its scale. A  
52  
53 correlation coefficient of 0.30 or higher has been recommended previously.[26] The intraclass  
54  
55 correlation coefficient was used as an estimate of the test-retest reliability, and was used to  
56  
57  
58  
59  
60

1  
2  
3 assess the correlation between scores obtained at different times for each scale; the estimated  
4  
5 coefficients should exceed 0.7.[24]  
6  
7

8  
9  
10 The item structure from EFAs was used to construct theoretically derived scales. CFA was  
11  
12 applied to further test the relationship between the observed variables and their underlying  
13  
14 latent constructs identified from the EFAs. The LISREL analysis program was used to test the  
15  
16 goodness of fit of the models [27] using various fit indexes, including the root mean square  
17  
18 error of approximation (RMSEA), the goodness-of-fit index (GFI), the comparative fit index  
19  
20 (CFI) and the incremental fit index (IFI). An RMSEA of 0.05 or less, and a GFI and CFI of  
21  
22 0.90 or above are generally taken to indicate a good fit. The IFI values range from 0 to 1, with  
23  
24 larger values indicating a better goodness of fit.  
25  
26

27  
28  
29 Construct validity refers to whether a scale measures or is correlated with the theorised  
30  
31 scientific construct, and was assessed by exploring the associations of scale scores as well as  
32  
33 their associations with additional items not included in the scales. A systematic review  
34  
35 identified 139 articles that provided evidence about determinants of satisfaction,[4] and  
36  
37 concluded that satisfaction was linked to prior satisfaction, predisposition, utilisation, granting  
38  
39 of desires, health status, health outcomes and age. Evidence about the effects of gender,  
40  
41 ethnicity, socioeconomic status and expectations was equivocal. Following the literature  
42  
43 review and previous findings,[4–17] it was hypothesised that scale scores would be correlated  
44  
45 with global satisfaction, age, gender and health status. Time since cancer diagnosis and  
46  
47 whether the treatment provided was considered the best possible were also hypothesised as  
48  
49 potential determinants.  
50  
51  
52  
53  
54  
55  
56  
57  
58  
59  
60

## RESULTS

### Data collection

Of the 14,227 questionnaires that were mailed to cancer patients, 137 were returned due to erroneous addresses, and 244 of the patients had died. Accordingly, the adjusted total sample was 13,846 patients, of which 7212 responded (52%), 6642 patients with experiences from outpatient wards and 4856 patients from inpatient wards; 4460 patients had attended both inpatient and outpatient wards at the hospital. Table 1 lists the characteristics of the respondents.

Table 1. Patient characteristics. Except where stated otherwise, data are *n* (%) values.

| Variable                             | Outpatients<br>(N=6642) | Inpatients<br>(N=4856) | All respondents<br>(N=7212)<br><i>n</i> (%) |
|--------------------------------------|-------------------------|------------------------|---------------------------------------------|
| <b>Gender</b>                        |                         |                        |                                             |
| Male                                 | 3733 (56)               | 2590 (53)              | 4049 (56)                                   |
| Female                               | 2908 (44)               | 2265 (47)              | 3162 (44)                                   |
| <b>Age in years (mean±SD)</b>        | 66±12.2                 | 66±12.2                | 66±12.1                                     |
| <b>Education level</b>               |                         |                        |                                             |
| Primary school                       | 1742 (27)               | 1319 (28)              | 1947 (28)                                   |
| High school                          | 2408 (38)               | 1831 (39)              | 2608 (38)                                   |
| University undergraduate             | 1425 (22)               | 983 (21)               | 1519 (22)                                   |
| University postgraduate              | 838 (13)                | 557 (12)               | 884 (13)                                    |
| <b>Native language</b>               |                         |                        |                                             |
| Norwegian                            | 6324 (97)               | 4628 (97)              | 6858 (97)                                   |
| Sami                                 | 7 (0)                   | 6 (0)                  | 7 (0)                                       |
| Other Nordic                         | 59 (1)                  | 35 (1)                 | 64 (1)                                      |
| Other European                       | 92 (1)                  | 70 (2)                 | 100 (1)                                     |
| Non-European                         | 35 (1)                  | 30 (1)                 | 39 (1)                                      |
| <b>Main activity</b>                 |                         |                        |                                             |
| Work                                 | 1556 (24)               | 1128 (24)              | 1670 (24)                                   |
| Sick leave                           | 1270 (20)               | 994 (21)               | 1369 (19)                                   |
| Retired                              | 3537 (54)               | 2516 (53)              | 3860 (55)                                   |
| Education                            | 33 (1)                  | 27 (1)                 | 35 (1)                                      |
| Home worker                          | 52 (1)                  | 43 (1)                 | 56 (1)                                      |
| Unemployed                           | 24 (0)                  | 18 (0)                 | 28 (0)                                      |
| Other                                | 50 (1)                  | 43 (1)                 | 56 (1)                                      |
| <b>Marital status</b>                |                         |                        |                                             |
| Married                              | 4559 (71)               | 3302 (70)              | 4941 (71)                                   |
| Cohabitant                           | 529 (8)                 | 409 (9)                | 579 (8)                                     |
| Neither married nor cohabitant       | 1347 (21)               | 991 (21)               | 1457 (21)                                   |
| <b>Type of cancer (ICD-10 codes)</b> |                         |                        |                                             |
| Breast                               | 884 (13)                | 669 (14)               | 932 (13)                                    |
| Female genitalia                     | 452 (7)                 | 363 (8)                | 489 (7)                                     |
| Male genitalia                       | 1449 (22)               | 822 (17)               | 1591 (22)                                   |
| Skin                                 | 493 (7)                 | 119 (3)                | 512 (7)                                     |
| Respiratory organs                   | 347 (5)                 | 273 (6)                | 386 (5)                                     |
| Urinary tract                        | 697 (11)                | 641 (13)               | 751 (10)                                    |
| Digestive organs                     | 866 (13)                | 860 (18)               | 984 (14)                                    |
| Blood                                | 1031 (16)               | 728 (15)               | 1103 (15)                                   |
| Other                                | 422 (6)                 | 380 (8)                | 463 (6)                                     |
| <b>Time since diagnosis</b>          |                         |                        |                                             |
| Less than 3 months                   | 171 (3)                 | 132 (3)                | 209 (3)                                     |
| 3–6 months                           | 807 (12)                | 562 (12)               | 929 (13)                                    |
| 6–12 months                          | 1192 (18)               | 840 (18)               | 1295 (18)                                   |
| 1–2 years                            | 1205 (18)               | 883 (19)               | 1286 (18)                                   |
| 2–5 years                            | 1740 (27)               | 1286 (27)              | 1864 (26)                                   |
| More than 5 years                    | 1424 (22)               | 1070 (22)              | 1498 (21)                                   |
| <b>Type of contact</b>               |                         |                        |                                             |
| Examination                          | 3876 (58)               | 2747 (57)              | -                                           |
| Surgery                              | 1928 (29)               | 3189 (66)              | -                                           |
| Radiotherapy                         | 1082 (16)               | 510 (11)               | -                                           |
| Chemotherapy                         | 2345 (35)               | 1181 (24)              | -                                           |
| Hormone therapy                      | 663 (10)                | 220 (5)                | -                                           |
| Control/follow up                    | 4456 (67)               | 1960 (40)              | -                                           |
| Other                                | 492 (7)                 | 570 (12)               | -                                           |

*N*, total number; *n*, number of responses received; ICD-10, International Classification of Diseases, 10th Revision

### Data quality and psychometric evaluation

The levels of missing data and descriptive statistics for the items are presented in Table 2. The levels of missing data ranged from 2% to 12%, which can be considered as acceptable for most items. Responses in the category “not applicable” ranged from 2% to 33%. However, since the questionnaire was intended to apply to all cancer patients, rates of not applicable or missing data higher than 10% were accepted. Mean scores for single items were generally skewed towards a positive rating (Table 2). The mean scores were lowest (at 3.2 for both outpatients and inpatients) for information about pain and pain alleviation. The mean scores were highest for items about patient safety, and ranged from 4.5 to 4.7.

Separate EFAs were conducted for outpatients and inpatients. Results from the first factor analyses for both outpatients and inpatients showed that most of the items addressing organisation loaded on the first factor, which related to nurse contact. For outpatients, this was also the case for items about next of kin. Based on both empirical and theoretical assumptions, summed rating scales were constructed for organisation (outpatients and inpatients) and next of kin (outpatients).

Further analyses where these items were omitted produced four factors for outpatients and six for inpatients (see Table 2). All item-total correlation coefficients exceeded the 0.4 criterion (range 0.41–0.86). The four factors related to outpatients’ experiences were nurse contact, doctor contact, information and patient safety; the alpha values ranged from 0.61 to 0.92. The four-factor solution accounted for 62% of the total variance. The same four factors were produced for inpatients, comprising the equivalent items, as well as two other factors (next of kin and hospital standard); the alpha values ranged from 0.67 to 0.94. These six factors explained 63% of the total variance in the scores for inpatients’ experiences. Table 2 lists the

1  
2  
3 factor loadings. All factor loadings for the items exceeded 0.4, and no item had a cross-  
4  
5 loading greater than or equal to 0.40.  
6  
7

8  
9 Alpha values for 11 of the 13 scales satisfied the criterion of 0.70 or higher (Table 2).

10  
11 Cronbach's alpha is sensitive to the number of test items, and the two patient safety scales  
12  
13 that did not meet the criterion of 0.70 (0.614 and 0.667) had three test items each. Item-total  
14  
15 correlation coefficients showed that all items satisfied the stated criterion of 0.40, and it was  
16  
17 decided to keep the six scales for measuring outpatient experiences and the seven scales for  
18  
19 measuring inpatient experiences. Of the 291 patients mailed a retest questionnaire, 229  
20  
21 responded (79%). Table 2 lists the results of the test-retest correlations for the 13 scales. The  
22  
23 test-retest correlation coefficients ranged from 0.57 to 0.81 for outpatients and from 0.62 to  
24  
25 0.85 for inpatients.  
26  
27  
28  
29  
30  
31  
32  
33  
34  
35  
36  
37  
38  
39  
40  
41  
42  
43  
44  
45  
46  
47  
48  
49  
50  
51  
52  
53  
54  
55  
56  
57  
58  
59  
60



Table 2. Descriptive statistics<sup>a</sup>, factor loadings and internal consistency for outpatients and inpatients.

| Scale/item                           | Outpatients (N=6642) |                    |                   |      |                 |                                                     |                                              | Inpatients (N=4856) |                    |                   |      |                 |                                                     |                                              |
|--------------------------------------|----------------------|--------------------|-------------------|------|-----------------|-----------------------------------------------------|----------------------------------------------|---------------------|--------------------|-------------------|------|-----------------|-----------------------------------------------------|----------------------------------------------|
|                                      | Missing (%)          | Does not apply (%) | Mean <sup>a</sup> | SD   | Factor loadings | Cronbach's alpha/item-total correlation coefficient | Test-retest reliability <sup>b</sup> (n=229) | Missing (%)         | Does not apply (%) | Mean <sup>a</sup> | SD   | Factor loadings | Cronbach's alpha/item-total correlation coefficient | Test-retest reliability <sup>b</sup> (n=229) |
| <b>Nurse contact</b>                 |                      |                    | 79.8              |      |                 | 0.92                                                | 0.73                                         |                     |                    | 76.8              |      |                 | 0.93                                                | 0.83                                         |
| 1. Updated about your treatment      | 5                    | 9                  | 4.2               | 0.74 | 0.63            | 0.72                                                |                                              | 5                   | 5                  | 4.1               | 0.77 | 0.66            | 0.77                                                |                                              |
| 2. Followed up on side effects       | 6                    | 29                 | 4.0               | 0.94 | 0.64            | 0.73                                                |                                              | 6                   | 24                 | 4.0               | 0.85 | 0.75            | 0.78                                                |                                              |
| 3. Took your concerns seriously      | 6                    | 19                 | 4.2               | 0.79 | 0.80            | 0.81                                                |                                              | 6                   | 13                 | 4.1               | 0.81 | 0.93            | 0.84                                                |                                              |
| 4. Cared for you                     | 7                    | -                  | 4.4               | 0.70 | 0.88            | 0.79                                                |                                              | 5                   | -                  | 4.3               | 0.73 | 0.85            | 0.81                                                |                                              |
| 5. Provided enough time for dialogue | 8                    | -                  | 3.9               | 0.96 | 0.70            | 0.75                                                |                                              | 5                   | -                  | 3.6               | 0.99 | 0.63            | 0.75                                                |                                              |
| 6. Was understandable                | 7                    | -                  | 4.3               | 0.70 | 0.72            | 0.73                                                |                                              | 5                   | -                  | 4.2               | 0.70 | 0.62            | 0.72                                                |                                              |
| 7. Was competent                     | 8                    | -                  | 4.3               | 0.68 | 0.67            | 0.71                                                |                                              | 5                   | -                  | 4.2               | 0.72 | 0.60            | 0.74                                                |                                              |
| <b>Doctor contact</b>                |                      |                    | 77.6              |      |                 | 0.92                                                | 0.81                                         |                     |                    | 75.8              |      |                 | 0.93                                                | 0.85                                         |
| 1. Updated about your treatment      | 5                    | 5                  | 4.3               | 0.77 | 0.65            | 0.73                                                |                                              | 6                   | 4                  | 4.2               | 0.76 | 0.77            | 0.76                                                |                                              |
| 2. Followed up on side effects       | 7                    | 30                 | 3.8               | 0.98 | 0.62            | 0.72                                                |                                              | 8                   | 28                 | 3.8               | 0.93 | 0.55            | 0.75                                                |                                              |
| 3. Took your concerns seriously      | 6                    | 15                 | 4.0               | 0.87 | 0.83            | 0.83                                                |                                              | 7                   | 14                 | 4.0               | 0.85 | 0.82            | 0.84                                                |                                              |
| 4. Cared for you                     | 6                    | -                  | 4.1               | 0.85 | 0.93            | 0.83                                                |                                              | 6                   | -                  | 4.0               | 0.86 | 0.94            | 0.84                                                |                                              |
| 5. Provided enough time for dialogue | 5                    | -                  | 3.8               | 0.98 | 0.85            | 0.79                                                |                                              | 7                   | -                  | 3.6               | 1.01 | 0.82            | 0.79                                                |                                              |
| 6. Was understandable                | 6                    | -                  | 4.2               | 0.77 | 0.72            | 0.75                                                |                                              | 6                   | -                  | 4.1               | 0.77 | 0.74            | 0.73                                                |                                              |
| 7. Was competent                     | 5                    | -                  | 4.4               | 0.72 | 0.66            | 0.72                                                |                                              | 6                   | -                  | 4.4               | 0.71 | 0.73            | 0.74                                                |                                              |
| <b>Information</b>                   |                      |                    | 67.0              |      |                 | 0.92                                                | 0.79                                         |                     |                    | 65.3              |      |                 | 0.94                                                | 0.78                                         |
| 1. Your illness                      | 2                    | 3                  | 3.9               | 0.87 | 0.47            | 0.73                                                |                                              | 4                   | 5                  | 3.8               | 0.96 | 0.47            | 0.76                                                |                                              |
| 2. Treatment options                 | 3                    | 8                  | 3.9               | 0.95 | 0.51            | 0.72                                                |                                              | 4                   | 11                 | 3.8               | 1.03 | 0.55            | 0.76                                                |                                              |
| 3. Examination and test results      | 3                    | 2                  | 4.0               | 0.91 | 0.41            | 0.67                                                |                                              | 4                   | 4                  | 3.9               | 0.96 | 0.44            | 0.72                                                |                                              |
| 4. Side effects of treatment         | 4                    | 14                 | 3.5               | 1.13 | 0.85            | 0.82                                                |                                              | 5                   | 18                 | 3.5               | 1.14 | 0.91            | 0.85                                                |                                              |
| 5. Effects of treatment              | 5                    | 13                 | 3.7               | 1.03 | 0.82            | 0.83                                                |                                              | 6                   | 14                 | 3.6               | 1.05 | 0.86            | 0.86                                                |                                              |
| 6. Pain to be expected               | 4                    | 18                 | 3.2               | 1.24 | 0.96            | 0.80                                                |                                              | 5                   | 17                 | 3.2               | 1.20 | 0.96            | 0.82                                                |                                              |
| 7. Pain relief                       | 5                    | 21                 | 3.2               | 1.26 | 0.92            | 0.77                                                |                                              | 6                   | 19                 | 3.3               | 1.18 | 0.91            | 0.80                                                |                                              |
| <b>Organisation</b>                  |                      |                    | 71.4              |      |                 | 0.78                                                | 0.77                                         |                     |                    | 69.0              |      |                 | 0.82                                                | 0.85                                         |
| 1. Cooperation between hospital      | 7                    | 21                 | 3.8               | 0.91 | -               | 0.59                                                |                                              | 7                   | 22                 | 3.8               | 0.95 |                 | 0.64                                                |                                              |

|                                                 |    |    |      |      |       |      |      |    |    |      |      |       |      |      |
|-------------------------------------------------|----|----|------|------|-------|------|------|----|----|------|------|-------|------|------|
| departments                                     |    |    |      |      |       |      |      |    |    |      |      |       |      |      |
| 2. Staff collaboration                          | 6  | 10 | 4.1  | 0.77 | -     | 0.64 |      | 6  | 8  | 4.0  | 0.78 |       | 0.71 |      |
| 3. Information provided to the correct person   | 8  | -  | 4.0  | 0.90 | -     | 0.52 |      | 8  | -  | 3.9  | 0.88 |       | 0.65 |      |
| 4. Same group of nurses                         | 10 | -  | 3.6  | 1.14 | -     | 0.49 |      | 5  | -  | 3.4  | 1.04 |       | 0.55 |      |
| 5. Multiple doctors involved was a problem      | 6  | 26 | 3.8  | 1.18 | -     | 0.47 |      | 7  | 18 | 3.8  | 1.14 |       | 0.49 |      |
| 6. One doctor responsible                       | 6  | -  | 3.8  | 1.24 | -     | 0.51 |      | 7  | -  | 3.7  | 1.23 |       | 0.55 |      |
| <b>Patient safety</b>                           |    |    | 90.6 |      |       | 0.61 | 0.57 |    |    | 90.5 |      |       | 0.67 | 0.62 |
| 1. Information deliberately held back           | 4  | -  | 4.5  | 0.87 | -0.57 | 0.44 |      | 5  | -  | 4.6  | 0.80 | -0.64 | 0.49 |      |
| 2. Contradictory information about illness      | 6  | -  | 4.7  | 0.74 | -0.55 | 0.43 |      | 6  | -  | 4.6  | 0.79 | -0.70 | 0.48 |      |
| 3. Perceived incorrect treatment                | 5  | 11 | 4.7  | 0.81 | -0.52 | 0.41 |      | 6  | 7  | 4.6  | 0.82 | -0.66 | 0.47 |      |
| <b>Next of kin</b>                              |    |    | 80.9 |      |       | 0.87 | 0.65 |    |    | 79.9 |      |       | 0.85 | 0.81 |
| 1. Received next of kin                         | 6  | 33 | 4.3  | 0.80 | -     | 0.77 |      | 7  | 17 | 4.2  | 0.77 | 0.75  | 0.76 |      |
| 2. Arranged for next of kin to be present       | 6  | 33 | 4.2  | 0.91 | -     | 0.77 |      | 7  | 22 | 4.1  | 0.87 | 0.88  | 0.78 |      |
| 3. Arranged for interaction with visitors       | -  | -  | -    | -    | -     | -    |      | 6  | 10 | 4.2  | 0.75 | 0.67  | 0.64 |      |
| <b>Hospital standard</b>                        |    |    | -    |      |       | -    | -    |    |    | 71.3 |      |       | 0.74 | 0.75 |
| 1. Arranged for interaction with other patients | -  | -  | -    | -    | -     | -    |      | 6  | -  | 3.9  | 0.85 | 0.45  | 0.50 |      |
| 2. Physical environment                         | -  | -  | -    | -    | -     | -    |      | 12 | -  | 3.6  | 0.94 | 0.66  | 0.58 |      |
| 3. Food                                         | -  | -  | -    | -    | -     | -    |      | 7  | -  | 4.0  | 0.88 | 0.65  | 0.53 |      |
| 4. Cleanliness                                  | -  | -  | -    | -    | -     | -    |      | 7  | -  | 3.9  | 0.89 | 0.62  | 0.54 |      |

<sup>a</sup> Items are scored 1–5 and scales are scored 0–100, where a higher score represents a better experience.

<sup>b</sup> Intraclass correlation coefficient (ICC).

1  
2  
3 CFAs were applied to examine the hypothesised factor structures. The measurement part  
4 specifies the relationship of the latent to the observed variables, and the structural part of the  
5 models specifies the relationship among the latent variables. First, the six-factor solution of  
6 the outpatient experiences was tested, which revealed that there was a satisfactory model fit to  
7 the data ( $\chi^2=23559.96$ ,  $p<0.001$ ,  $df=458$ ,  $RMSEA=0.091$ ,  $GFI=0.81$ ,  $CFI=0.96$  and  $IFI=0.96$ ).  
8  
9 The results are shown in Figure 1. The exogenous, latent variables were the six factors, and  
10 the endogenous, latent variable was outpatient experiences, introducing a second-order  
11 analysis examining the correlations among the first-order factors to examine predictions on  
12 the endogenous variable. Organisation was the strongest predictor ( $\beta=0.95$ ), but nurse contact  
13 ( $\beta=0.89$ ), doctor contact ( $\beta=0.88$ ) and information ( $\beta=0.76$ ) were also strongly associated  
14 with the endogenous, latent variable. This was also the case for next of kin ( $\beta=0.61$ ) and  
15 patient safety ( $\beta=0.60$ ). Second, the seven-factor solution of the inpatient experiences was  
16 tested, which indicated a slightly better fit ( $\chi^2=26697.60$ ,  $p<0.001$ ,  $df=621$ ,  $RMSEA=0.083$ ,  
17  $GFI=0.81$ ,  $CFI=0.97$  and  $IFI=0.97$ ; Figure 2). The results were consistent with those of the  
18 previous CFA; the inpatient experiences factor was strongly affected by organisation  
19 ( $\beta=0.93$ ), nurse contact ( $\beta=0.89$ ), doctor contact ( $\beta=0.89$ ), information ( $\beta=0.77$ ), next of kin  
20 ( $\beta=0.70$ ) and hospital standard ( $\beta=0.70$ ). The prediction from patient safety was slightly  
21 lower ( $\beta=0.56$ ).  
22  
23  
24  
25  
26  
27  
28  
29  
30  
31  
32  
33  
34  
35  
36  
37  
38  
39  
40  
41  
42  
43  
44  
45  
46  
47  
48  
49  
50  
51  
52  
53  
54  
55  
56  
57  
58  
59  
60

Figure 1: Confirmatory factor analysis (CFA) model for outpatients.

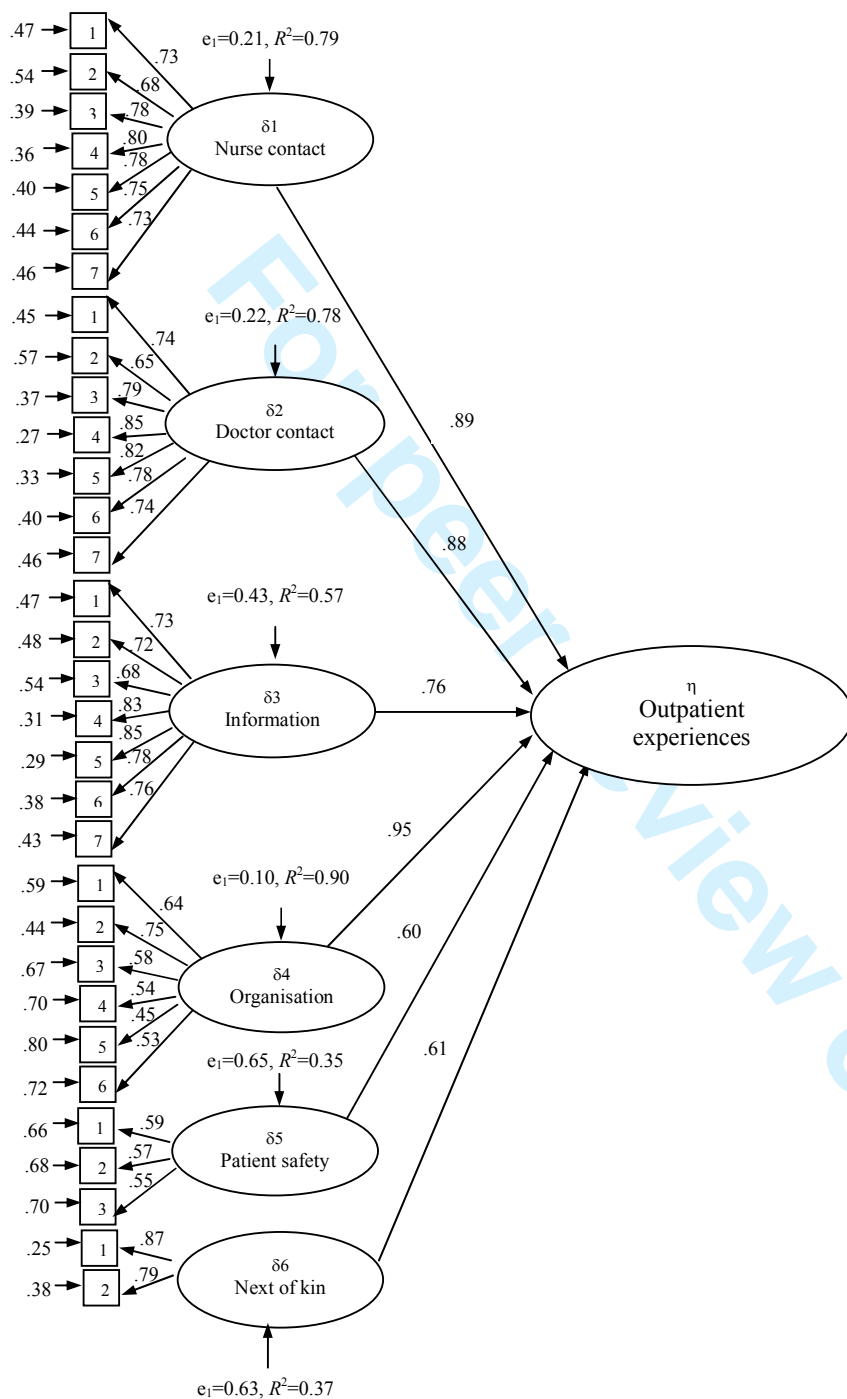

RMSEA=0.091, GFI=0.81, CFI=0.97, IFI=0.96

Figure 2: CFA model for inpatients.

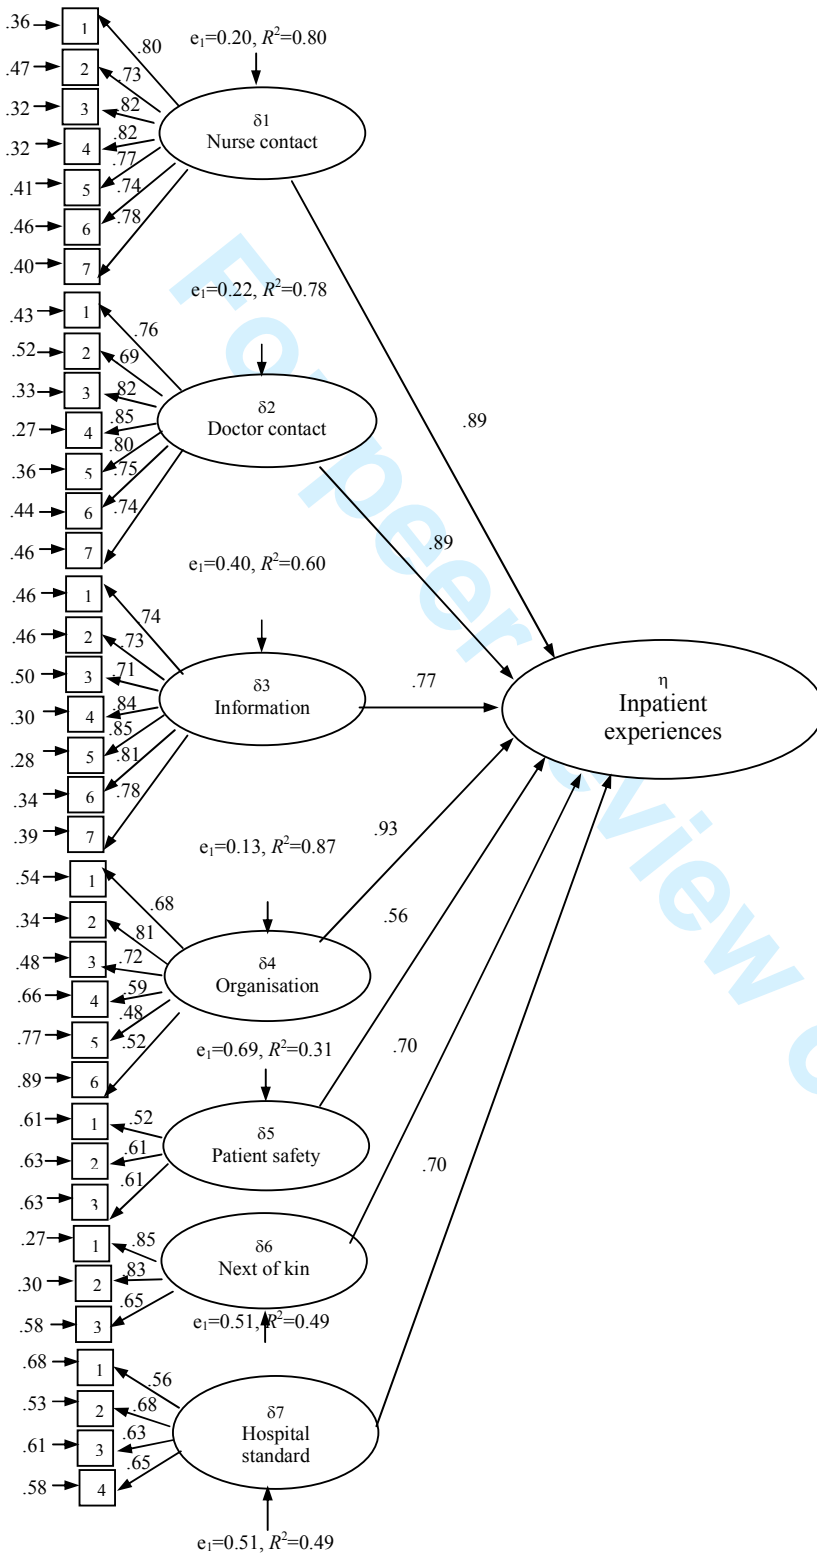

RMSEA=0.083, GFI=0.81, CFI=0.97, IFI=0.97

1  
2  
3 Table 3 gives the results of construct validity testing. The correlations between the scale  
4  
5 scores were all significant at the  $p<0.001$  level (range of correlation coefficients, 0.27–0.77).  
6  
7 The correlations were weakest for the patient safety scales and the other scales, and strongest  
8  
9 for organisation and doctor contact. The correlations between scale scores and other single  
10  
11 items were strongest for the patients' confidence in that the treatment received was the best  
12  
13 possible, with the correlation coefficients ranging from 0.43 to 0.70. Overall satisfaction and  
14  
15 overall experiences were moderately to strongly correlated to the scales (range of correlation  
16  
17 coefficients, 0.24–0.59), with all correlations significant at the  $p<0.001$  level. A significant  
18  
19 correlation was also found between all of the scales and the patients' health status, indicating  
20  
21 that patients with poorer health scored substantially lower on all scales. Age and time since  
22  
23 cancer diagnosis were more weakly correlated with the scales. Results from  $t$ -tests showed  
24  
25 significant but small differences between men and women on four scales. Relative to women,  
26  
27 male outpatients had significantly lower scores on the next of kin scale ( $t=-2.03$ ,  $p<0.05$ );  
28  
29 however, male inpatients had higher scores for nurse contact ( $t=2.79$ ,  $p<0.01$ ), organisation  
30  
31 ( $t=3.78$ ,  $p<0.001$ ) and hospital standard ( $t=6.84$ ,  $p<0.001$ ).  
32  
33  
34  
35  
36  
37  
38  
39  
40  
41  
42  
43  
44  
45  
46  
47  
48  
49  
50  
51  
52  
53  
54  
55  
56  
57  
58  
59  
60

Table 3. Correlations<sup>a</sup> between scale scores and individual items for outpatients and inpatients.

| Scale/item                                              | Outpatients (N=6642) |                     |                     |                     |                     |                     | Inpatients (N=4856) |                    |                    |                     |                     |                     |                     |
|---------------------------------------------------------|----------------------|---------------------|---------------------|---------------------|---------------------|---------------------|---------------------|--------------------|--------------------|---------------------|---------------------|---------------------|---------------------|
|                                                         | Nurse contact        | Doctor contact      | Information         | Organisation        | Patient safety      | Next of kin         | Nurse contact       | Doctor contact     | Information        | Organisation        | Patient safety      | Next of kin         | Hospital standard   |
| Doctor contact                                          | 0.73                 |                     |                     |                     |                     |                     | 0.75                |                    |                    |                     |                     |                     |                     |
| Information                                             | 0.64                 | 0.68                |                     |                     |                     |                     | 0.68                | 0.71               |                    |                     |                     |                     |                     |
| Organisation                                            | 0.68                 | 0.73                | 0.61                |                     |                     |                     | 0.73                | 0.77               | 0.68               |                     |                     |                     |                     |
| Patient safety                                          | 0.38                 | 0.44                | 0.38                | 0.41                |                     |                     | 0.39                | 0.44               | 0.39               | 0.40                |                     |                     |                     |
| Next of kin                                             | 0.63                 | 0.58                | 0.47                | 0.53                | 0.29                |                     | 0.65                | 0.61               | 0.51               | 0.55                | 0.29                |                     |                     |
| Hospital standard                                       | -                    | -                   | -                   | -                   | -                   | -                   | 0.55                | 0.50               | 0.42               | 0.48                | 0.27                | 0.55                |                     |
| Overall satisfaction with service                       | 0.51                 | 0.51                | 0.51                | 0.48                | 0.39                | 0.36                | 0.59                | 0.56               | 0.52               | 0.55                | 0.40                | 0.44                | 0.43                |
| Overall experience with service                         | 0.44                 | 0.43                | 0.45                | 0.44                | 0.24                | 0.35                | 0.52                | 0.45               | 0.46               | 0.48                | 0.26                | 0.41                | 0.39                |
| Confident that treatment provided was the best possible | 0.64                 | 0.69                | 0.57                | 0.61                | 0.43                | 0.54                | 0.70                | 0.69               | 0.58               | 0.65                | 0.43                | 0.57                | 0.48                |
| Health status                                           | -0.17                | -0.21               | -0.22               | -0.16               | -0.18               | -0.10               | -0.23               | -0.22              | -0.24              | -0.22               | -0.18               | -0.13               | -0.17               |
| Age                                                     | -0.04 <sup>**</sup>  | 0.02 <sup>ns</sup>  | -0.11               | -0.01 <sup>ns</sup> | 0.10                | -0.00 <sup>ns</sup> | 0.01 <sup>ns</sup>  | 0.02 <sup>ns</sup> | -0.09              | -0.01 <sup>ns</sup> | 0.11                | 0.01 <sup>ns</sup>  | 0.08                |
| Time since cancer diagnosis                             | -0.02 <sup>ns</sup>  | -0.01 <sup>ns</sup> | -0.01 <sup>ns</sup> | -0.04 <sup>**</sup> | -0.03 <sup>ns</sup> | -0.06 <sup>**</sup> | -0.04 <sup>**</sup> | -0.03 <sup>*</sup> | 0.01 <sup>ns</sup> | -0.05 <sup>**</sup> | -0.01 <sup>ns</sup> | -0.05 <sup>**</sup> | -0.00 <sup>ns</sup> |

<sup>a</sup>Data are Spearman's rank correlations ( $r$ ). All correlations are significant at  $p < 0.001$  except for <sup>\*\*</sup> ( $p < 0.01$ ), <sup>\*</sup> ( $p < 0.05$ ) and ns ( $p > 0.05$ ).

The questionnaire also included items about hospital care not directly related to either outpatient or inpatient wards, addressing the hospitals' extra-medical services, cooperation with the primary doctor and other community services, and information on how to manage future problems. The items had high levels of responses in the category "not applicable" (range, 12–63) indicating that they are not relevant to a high proportion of the respondents. Table 4 indicates that the items have lower mean scores than those included in the other factors, ranging from 2.5 to 3.4. Factor analysis revealed a one-factor solution accounting for 57% of the variance of the scores (Table 4). The factor loadings ranged from 0.56 to 0.79, the item-total correlation coefficients ranged from 0.52 to 0.71 and the results from reliability analysis yielded a Cronbach's alpha of 0.85. The test-retest correlation coefficient for this scale was 0.78.

Table 4. Descriptive statistics<sup>a</sup>, factor loadings and internal consistency for all patients.

| Scale/item                                              | All patients (N=7212) |                    |                   |      |                 |                                                     |                                              |
|---------------------------------------------------------|-----------------------|--------------------|-------------------|------|-----------------|-----------------------------------------------------|----------------------------------------------|
|                                                         | Missing (%)           | Does not apply (%) | Mean <sup>a</sup> | SD   | Factor loadings | Cronbach's alpha/item-total correlation coefficient | Test-retest reliability <sup>b</sup> (n=229) |
| <b>Extra-medical services, information, cooperation</b> |                       |                    | <b>49.2</b>       |      |                 | <b>0.85</b>                                         | <b>0.78</b>                                  |
| Hospital extra-medical services                         | 6                     | 45                 | 2.5               | 1.35 | 0.65            | 0.60                                                |                                              |
| Hospital cooperation with primary doctor                | 6                     | 16                 | 3.4               | 1.15 | 0.56            | 0.52                                                |                                              |
| Hospital cooperation with community services            | 7                     | 63                 | 2.8               | 1.37 | 0.64            | 0.60                                                |                                              |
| Information about future problems                       | 5                     | 12                 | 3.2               | 1.22 | 0.74            | 0.65                                                |                                              |
| Information about managing potential relapse            | 6                     | 19                 | 2.9               | 1.30 | 0.79            | 0.69                                                |                                              |
| Information about rehabilitation                        | 6                     | 40                 | 2.5               | 1.31 | 0.79            | 0.71                                                |                                              |

<sup>a</sup> Items are scored 1–5 and scales are scored 0–100, where a higher score represents a better experience.

<sup>b</sup> ICC.

The scale was not correlated significantly with time since cancer diagnosis, but patients with poorer health reported significantly more negative experiences, as did older patients and women (see Table 5). Results from *t*-tests showed that male patients reported significantly more positive experiences than did female patients ( $t=3.54$ ,  $p<0.001$ ).



Table 5. Correlations<sup>a</sup> between scale score and individual items for all patients.

| Scale/item                  | All patients (N=7212)<br>Extra-medical services,<br>information, cooperation |
|-----------------------------|------------------------------------------------------------------------------|
| Health status               | -0.23                                                                        |
| Age                         | -0.11                                                                        |
| Time since cancer diagnosis | -0.02 <sup>ns</sup>                                                          |

<sup>a</sup>All correlations are significant at  $p < 0.001$  except for ns ( $p > 0.05$ ).

## DISCUSSION

This study was part of the first national survey undertaken in Norway to assess cancer patients' experiences with somatic hospitals. The development of the CPEQ followed a review of the literature, interviews with cancer patients, and consultation with an expert group of professionals and researchers. The resulting questionnaire underwent a thorough process of piloting and testing for data quality, reliability and construct validity, as recommended for evaluating such questionnaires. The CPEQ addresses broad domains of cancer-related care at somatic hospitals, rather than focusing on specific treatments, cancer types or specific professionals involved in care of the patients.

The results from the survey can be used as national quality indicators in Norway and were designed to inform patient choice and for quality improvement. The CPEQ was designed specifically for use with cancer patients attending somatic hospitals, and was assumed to increase content validity from a patient perspective as well as allowing hospital staff to investigate in detail the extent to which their service meets the needs of their patients.

Questionnaires that assess specific aspects of care allow the domains where patients have poorer experiences to be identified and potentially improved.

Satisfactory evidence of internal consistency, test-retest reliability and construct validity was obtained, indicating that the CPEQ can be considered a high-quality instrument. The results of

1  
2  
3 the EFAs and tests of internal consistency provided empirical support for the scales, and  
4 confirmed that both outpatient and inpatient experiences are multidimensional concepts.  
5  
6 CFAs were supportive of the structures suggested by EFAs. There is evidence for construct  
7  
8 validity of the questionnaire following the application of hypotheses based on previous  
9  
10 research findings and theory.[7, 8–19] The results also provide support for the longitudinal  
11  
12 temporal stability of the measure. High agreement between scores administered  
13  
14 approximately 1 week apart provided good evidence of the test-retest reliability of the CPEQ.  
15  
16  
17  
18  
19

20  
21 Some limitations of the study should be considered. The levels of missing data suggest that  
22  
23 the measure is acceptable to patients. However, some of the included items were only relevant  
24  
25 for some of the respondents. It may be possible to extract a shorter version of the CPEQ with  
26  
27 fewer questions without sacrificing the psychometric qualities of the measure, but this task  
28  
29 was beyond the scope of this study. Another potential limitation is the response rate. In  
30  
31 general, postal surveys have lower response rates than other data-collection modes.[4] Non-  
32  
33 response bias occurs when the main variables differ systematically between respondents and  
34  
35 non-respondents.[28] The response rate (52%) means that almost half of the patients failed to  
36  
37 respond; however, it was relatively high compared with previous user experience surveys  
38  
39 carried out in Norway.[8–19] Findings from some of these surveys have shown that the low  
40  
41 response rates have not caused serious bias.[15, 29–32] The findings from a Norwegian  
42  
43 follow-up study involving a hospital population showed that postal respondents and non-  
44  
45 respondents had almost the same scores.[32]. These studies indicate that non-response might  
46  
47 be of less concern, but uncertainty related to external validity means that more research is  
48  
49 needed on the effect of non-response in patient experience surveys on cancer care.  
50  
51  
52  
53  
54  
55  
56  
57  
58  
59  
60

1  
2  
3 Consistent with previous findings,[33–35] some skewing towards positive assessment was  
4 identified. Whether this reflects truly positive experiences or low expectations is  
5 unknown.[36] As for any study based on self-reports, social desirability bias and recall bias  
6 may also have affected the results. Respondents may introduce bias in several ways, for  
7 example by giving socially desirable responses as a result of cognitive consistency pressure  
8 (making ratings congruent with their continuing use of the service) and through acquiescent  
9 response sets (a tendency always to agree or reply positively).[4] However, respondents have  
10 been shown to give more positive and socially desirable responses in interview surveys than  
11 in self-administered surveys.[37] Moreover, it is assumed that recall bias is less likely when  
12 asking about the overall experience rather than about a specific visit or hospitalisation.  
13  
14  
15  
16  
17  
18  
19  
20  
21  
22  
23  
24  
25  
26

27 Instead of developing a cancer-specific questionnaire, one of the existing generic  
28 questionnaires could potentially have been used in the national survey, such as the Patient  
29 Experience Questionnaire.[8] This would have reduced the resource requirements, and also  
30 has some empirical support. One study compared the measurement properties and the  
31 patients' evaluation of one generic and two psychiatric-specific patient satisfaction  
32 questionnaires in a sample of psychiatric patients. The results indicated that no single  
33 instrument was superior in either respect.[38] Another study identified ten generic core items  
34 covering major dimensions of experiences that patients across a range of specialist health-care  
35 services report to be important.[39] A short, generic questionnaire might be expected to give a  
36 higher response rate and better comparability than the CPEQ, but would not be suited for the  
37 purpose of a national survey in Norway. The purpose of the present study was a broad  
38 assessment of hospital cancer care. Furthermore, content validity is better for a cancer-  
39 specific questionnaire, since all activities are directed against securing validity for cancer  
40  
41  
42  
43  
44  
45  
46  
47  
48  
49  
50  
51  
52  
53  
54  
55  
56  
57  
58  
59  
60

1  
2  
3 patients, rather than to patients in general. Naturally, a national survey with a narrower focus  
4  
5 could have used a generic and perhaps shorter questionnaire.  
6  
7

8  
9 Results from the national patient experience survey program in Norway are used to develop  
10  
11 quality indicators presented both to the public and to the responsible institutions. Public use  
12  
13 includes an Internet site for free hospital choice in Norway. Research has shown that patients  
14  
15 have difficulty understanding quality information,[40] and that “less is more” in this  
16  
17 respect.[41] Therefore, an aggregated and overall measure of experiences with the hospitals  
18  
19 seems appropriate in the context of presenting information to patients. Further research is  
20  
21 needed to determine how to construct a composite score, including how to weight each of the  
22  
23 underlying subdimensions. More specific results are called for when reporting information to  
24  
25 health providers with the aim of evaluating and improving the quality of care.[33]  
26  
27

28  
29 Consequently, aggregated scores on the 13 CPEQ subdimensions might be a useful  
30  
31 supplement when reporting results to the responsible hospitals.  
32  
33

34  
35  
36 Comparing the contribution at the organisational and individual levels is relevant for  
37  
38 comparisons of hospitals based on patient evaluations. The approach for institutional  
39  
40 benchmarking in the national survey program involves developing an appropriate case-mix  
41  
42 model and correct for multiple comparisons in statistical testing. Another emerging approach  
43  
44 is to use multilevel analysis to estimate the amount of variation in scores that can be explained  
45  
46 by levels above the individual level.[42] A previous study of patient experiences found that  
47  
48 only a small part of the variation is attributable to the organisational level.[43] Future studies  
49  
50 based on the CPEQ should explore this topic further in order to elucidate the usefulness of the  
51  
52 CPEQ as a basis for quality indicators at the hospital level. This also includes research on  
53  
54 hospital-level reliability, which is based on the theory that patients who are treated at the same  
55  
56  
57  
58  
59  
60

1  
2  
3 hospital should agree regarding their assessments of that hospital. The larger the ratio of  
4  
5 between- to within-hospital variation in the scores, and the larger the number of respondents,  
6  
7 the more precise will be the measurement of differences between hospitals, and thus the  
8  
9 greater the reliability of the scores. [44]  
10

11  
12  
13  
14 Patient satisfaction questionnaires have been criticised for insufficient knowledge of their  
15  
16 reliability and validity in psychometric testing.[3] The strengths of the present study include  
17  
18 the psychometric assessment of the CPEQ following a national survey, including data quality,  
19  
20 dimensionality, internal consistency and construct validity. The scale should prove useful for  
21  
22 evaluating cancer patients' experiences with hospitals in Norway and in similar settings in  
23  
24 other countries, and includes the most important aspects regarding both inpatient and  
25  
26 outpatient hospital care from the patient perspective.  
27  
28  
29

### 30 31 32 **Conclusions**

33  
34 Valid and reliable measures for the measurement of cancer patients' experiences with  
35  
36 hospitals are crucial if the data are to be used in quality improvement, business control and by  
37  
38 both patients and the general public. The CPEQ includes the most important aspects of cancer  
39  
40 patients' experiences with somatic hospitals, from the perspective of the cancer patients  
41  
42 themselves. The present study has provided strong evidence for the high data quality, internal  
43  
44 consistency, content and construct validity of this questionnaire. The questionnaire is  
45  
46 recommended for future applications designed to assess cancer patients' experiences of both  
47  
48 inpatient and outpatient care in Norway and similar settings in other countries. Further  
49  
50 investigation of the explanatory characteristics of variations in cancer patients' experience  
51  
52 with health care is warranted.  
53  
54  
55  
56  
57  
58  
59  
60

### **Acknowledgements**

The authors thank Tomislav Dimoski at the Norwegian Knowledge Centre for Health Services, Oslo, Norway, for developing the software necessary for gathering data from the hospitals, and for conducting the data collection and quality assurance of data. We also thank Saga Høgheim and Marit Skarpaas, who carried out most of the practical tasks relating to data collection, as well as members of the expert group that contributed to the development of the questionnaire and survey design.

### **Competing interests**

The authors declare that they have no competing interests.

### **Funding**

The survey was funded by the Norwegian Ministry of Health.

### **Authors' contributions**

All authors contributed to the design of the questionnaire and survey. H.I.I. conducted the analysis and drafted the manuscript. H.I.I. and O.H. were involved in the data acquisition. All authors have made significant contributions by critically reviewing the manuscript and have read and approved the final version.

**REFERENCES**

1. Kelly E, Hurst J. Health Care Quality Indicators Project: Conceptual Framework Paper. OECD Health Working Papers 23-2006. Paris: OECD, 2006.
2. Murray CJ, Frenk J. A framework for assessing the performance of health systems. *Bull World Health Organ* 2000;**78**(6):717–31.
3. Bjertnæs ØA, Sjetne IS, Iversen HH. Overall patient satisfaction with hospitals: effects of patient-reported experiences and fulfilment of expectations. *BMJ Qual Saf* 2012;**21**(1):39–46.
4. Crow R, Gage H, Hampson S, et al. The measurement of satisfaction with healthcare: implications for practice from a systematic review of the literature. *Health Technol Assess* 2002;**6**(32):1–244.
5. Barbosa CD, Balp MM, Kulich K, et al. A literature review to explore the link between treatment satisfaction and adherence, compliance, and persistence. *Patient Prefer Adherence* 2012;**6**:39–48.
6. Sitzia J. How valid and reliable are patient satisfaction data? An analysis of 195 studies. *Int J Qual Health Care* 1999;**11**(4):319–28.
7. Cleary P, Edgman-Levitan S, McMullen W, et al. The relationship between reported problems and summary evaluations of hospital care. *QRB Qual Rev Bull* 1992; **18**(2):53–9.
8. Pettersen KI, Veenstra M, Guldvog B, et al. The Patient Experiences Questionnaire: development, validity and reliability. *Int J Qual Health Care* 2004;**16**(6):453–63.
9. Garratt AM, Bjertnæs ØA, Krogstad U, et al. The OutPatient Experiences Questionnaire (OPEQ): data quality, reliability and validity in patients attending 52 Norwegian hospitals. *Qual Saf Health Care* 2005;**14**(6):433–7.

- 1  
2  
3  
4  
5  
6  
7  
8  
9  
10  
11  
12  
13  
14  
15  
16  
17  
18  
19  
20  
21  
22  
23  
24  
25  
26  
27  
28  
29  
30  
31  
32  
33  
34  
35  
36  
37  
38  
39  
40  
41  
42  
43  
44  
45  
46  
47  
48  
49  
50  
51  
52  
53  
54  
55  
56  
57  
58  
59  
60
10. Garratt AM, Danielsen K, Bjertnæs ØA, et al. PIPEQ – a method for measurement of user satisfaction in mental health services. *Tidsskr Nor Laegeforen* 2006;**126**(11):1478–80.
  11. Garratt AM, Bjørngaard JH, Dahle KA, et al. The Psychiatric Out-Patient Experiences Questionnaire (POPEQ): data quality, reliability, and validity in patients attending 90 Norwegian clinics. *Nord J Psychiatry* 2006;**60**(2):89–96.
  12. Garratt AM, Bjertnæs ØA, Barlinn J. Parent experiences of paediatric care (PEPC) questionnaire: reliability and validity following a national survey. *Acta Paediatr* 2007;**96**(2):246–52.
  13. Bjertnæs ØA, Garratt AM, Nessa J. The GPs' Experiences Questionnaire (GPEQ): reliability and validity following a national survey to assess GPs' views of district psychiatric services. *Fam Pract* 2007;**24**(4):336–42.
  14. Bjertnæs ØA, Garratt A, Ruud T, et al. The General Practitioner Experiences Questionnaire (GPEQ): validity and reliability following the inclusion of new accessibility items. *Fam Pract* 2010;**27**(5):513–9.
  15. Garratt AG, Bjertnæs ØA, Holmboe O, et al. Parent Experiences Questionnaire for Child and Adolescent Mental Health Services (PEQ-CAMHS): reliability and validity following a national survey. *Child Adolesc Psychiatry Ment Health* 2011;**5**:18.
  16. Garratt AM, Danielsen K, Forland O, et al. The Patient Experiences Questionnaire for Out-of-Hours Care (PEQ-OHC): data quality, reliability, and validity. *Scand J Prim Health Care* 2010;**28**(2):95–101.
  17. Oltedal S, Garratt A, Bjertnæs ØA, et al. The NORPEQ patient experiences questionnaire: data quality, internal consistency and validity following a Norwegian inpatient survey. *Scand J Public Health* 2007;**35**(5):540–7.



- 1  
2  
3 18. Bjertnæs ØA, Lyngstad I, Malterud K, et al. The Norwegian EUROPEP questionnaire for  
4 patient evaluation of general practice: data quality, reliability and construct validity. *Fam*  
5 *Pract* 2011;**28**(3):342–9.  
6  
7  
8  
9  
10 19. Olsen RV, Garratt AM, Iversen HH, et al. Rasch analysis of the Psychiatric Out-Patient  
11 Experiences Questionnaire (POPEQ). *BMC Health Serv Res* 2010;**10**:282.  
12  
13  
14 20. Brédart A, Morvan E, Savignoni A, et al. Respiratory Gated Radiotherapy Study Group  
15 Stic-Rar 2003. Patient's perception of care quality during radiotherapy sessions using  
16 respiratory gating techniques: validation of a specific questionnaire. *Cancer Invest.*  
17  
18 2011;**29**(2):145–52.  
19  
20  
21  
22 21. Department of Health (2002) National Survey: Cancer Patients.  
23  
24 <http://www.dh.gov.uk/en/Publicationsandstatistics/PublishedSurvey/NationalsurveyofNH>  
25 [Spatients/Nationalsurveycancer/index.htm](http://www.dh.gov.uk/en/Publicationsandstatistics/PublishedSurvey/NationalsurveyofNH) (Last accessed 19 Dec 2011).  
26  
27  
28  
29 22. National Audit Office (2005) Tackling Cancer: Improving the Patient Journey.  
30 Department of Health. The Stationery Office: London.  
31  
32 [http://www.nao.org.uk/publications/0405/tackling\\_cancer.aspx](http://www.nao.org.uk/publications/0405/tackling_cancer.aspx) (Last accessed 19 Dec  
33 2011).  
34  
35  
36  
37 23. Gustafsson JE, Stahl PA. STREAMS User's Guide. Version 2.5 for Windows. Mölndal,  
38 Sweden: Multivariate Ware; 2000.  
39  
40  
41  
42 24. Nunnally JC, Bernstein IH. Psychometric Theory, 3rd edn. New York: McGraw-Hill;  
43 1994.  
44  
45  
46  
47 25. Kline P: The Handbook of Psychological Testing. London: Routledge; 1993.  
48  
49  
50 26. Hair J, Anderson RE, Tatham RL, et al. Multivariate Data ANALYSIS with Readings. 4th  
51 edn. Englewood Cliffs, New Jersey: Prentice-Hall international; 1995.  
52  
53  
54 27. Jöreskog KG, Sörbom D. LISREL 8. Structural Equation Modelling with the SIMPLIS  
55 Command Language. Hillsdale NJ: Erlbaum; 1993.  
56  
57  
58  
59  
60

- 1  
2  
3  
4  
5  
6  
7  
8  
9  
10  
11  
12  
13  
14  
15  
16  
17  
18  
19  
20  
21  
22  
23  
24  
25  
26  
27  
28  
29  
30  
31  
32  
33  
34  
35  
36  
37  
38  
39  
40  
41  
42  
43  
44  
45  
46  
47  
48  
49  
50  
51  
52  
53  
54  
55  
56  
57  
58  
59  
60
28. Groves RM, Fowler FJ, Couper MP, et al. *Survey Methodology* (2nd edn). Hoboken, New Jersey: John Wiley & Sons; 2009.
  29. Bjertnæs ØA, Garratt AM, Johannessen JO. Data collection methods and results in users surveys in mental health care. *Tidsskr Nor Laegeforen* 2006;**126**(11):1481–3.
  30. Bjertnæs ØA, Garratt A, Botten G. Nonresponse bias and cost-effectiveness in a Norwegian survey of family physicians. *Eval Health Prof* 2008;**31**(1):65-80.
  31. Bjertnæs ØA, Garratt A, Iversen H, et al. The association between GP and patient ratings of quality of care at outpatient clinics. *Fam Pract* 2009;**26**(5):384–90.
  32. Guldvog B, Hofoss D, Pettersen KI, et al. PS-RESKVA (Patient Satisfaction, Results and Quality) – patient satisfaction in hospitals. *Tidsskr Nor Laegeforen* 1998;**118**(3):386–91.
  33. Jenkinson C, Coulter A, Bruster S, et al. Patients’ experiences and satisfaction with health care: results of a questionnaire study of specific aspects of care. *Qual Saf Health Care* 2002;**11**(4):335–9.
  34. Ware JE Jr, Hays RD. Methods for measuring patient satisfaction with specific medical encounters. *Med Care* 1988;**26**(4):393–402.
  35. Williams B, Coyle J, Healy D. The meaning of patient satisfaction: an explanation of high reported levels. *Soc Sci Med* 1998;**47**(9):1351–9.
  36. Sitzia J, Wood N. Patient satisfaction: a review of issues and concepts. *Soc Sci Med* 1997;**45**(12):1829–43.
  37. Tourangeau R, Smith TW. Asking sensitive questions: the impact of data collection mode, question format, and question context. *Pub Opin Quart* 1996;**60**(2):275–304.
  38. Peytremann-Bridevaux I, Scherer F, Peer L, et al. Satisfaction of patients hospitalised in psychiatric hospitals: a randomised comparison of two psychiatric-specific and one generic satisfaction questionnaires. *BMC Health Serv Res* 2006;**6**:108.

- 1  
2  
3 39. Sjetne IS, Bjertnæs ØA, Olsen RV, et al. The Generic Short Patient Experiences  
4  
5 Questionnaire (GSPEQ): identification of core items from a survey in Norway. *BMC*  
6  
7 *Health Serv Res* 2011;**11**:88.  
8  
9  
10 40. Faber M, Bosch M, Wollersheim H et al. Public reporting in health care: how do  
11  
12 consumers use quality-of-care information? A systematic review. *Med Care*  
13  
14 2009;**47**(1):1–8.  
15  
16 41. Peters E, Dieckmann N, Dixon A, et al. Less is more in presenting quality information to  
17  
18 consumers. *Med Care Res Rev* 2007;**64**(2):169–90.  
19  
20  
21 42. Bjertnæs ØA, Garratt A, Ruud T. Family physicians' experiences with community mental  
22  
23 health centers: a multilevel analysis. *Psychiatr Serv* 2008;**59**(8):864–70.  
24  
25 43. Sjetne IS, Veenstra M, Stavem K. The effect of hospital size and teaching status on patient  
26  
27 experiences with hospital care: a multilevel analysis. *Med Care* 2007;**45**(3):252–8.  
28  
29  
30 44. Keller S, O'Malley AJ, Hays RD, et al. Methods used to streamline the CAHPS Hospital  
31  
32 Survey. *Health Serv Res* 2005;**40**(6 Pt 2):2057–77.  
33  
34  
35  
36  
37  
38  
39  
40  
41  
42  
43  
44  
45  
46  
47  
48  
49  
50  
51  
52  
53  
54  
55  
56  
57  
58  
59  
60



**The Cancer Patient Experiences Questionnaire (CPEQ):  
reliability and construct validity following a national survey  
to assess hospital cancer care from the patient perspective**

|                                 |                                                                                                                                                                                                                           |
|---------------------------------|---------------------------------------------------------------------------------------------------------------------------------------------------------------------------------------------------------------------------|
| Journal:                        | <i>BMJ Open</i>                                                                                                                                                                                                           |
| Manuscript ID:                  | bmjopen-2012-001437.R2                                                                                                                                                                                                    |
| Article Type:                   | Research                                                                                                                                                                                                                  |
| Date Submitted by the Author:   | 22-Aug-2012                                                                                                                                                                                                               |
| Complete List of Authors:       | Iversen, Hilde; The Norwegian Knowledge Centre for the Health Services , Holmboe, Olaf; The Norwegian Knowledge Centre for the Health Services, Bjertnæs, Øyvind; The Norwegian Knowledge Centre for the Health Services, |
| <b>Primary Subject Heading</b>: | Health services research                                                                                                                                                                                                  |
| Secondary Subject Heading:      | Research methods                                                                                                                                                                                                          |
| Keywords:                       | Patient satisfaction, Cancer, Validity and reliability                                                                                                                                                                    |
|                                 |                                                                                                                                                                                                                           |

SCHOLARONE™  
Manuscripts

1  
2  
3 **The Cancer Patient Experiences Questionnaire (CPEQ): reliability and construct**  
4 **validity following a national survey to assess hospital cancer care from the patient**  
5 **perspective**  
6  
7  
8  
9

10  
11 **Hilde Hestad Iversen<sup>§</sup>, Olaf Holmboe, Øyvind Andresen Bjertnæs**  
12  
13

14  
15  
16 Department for Quality Measurement and Patient Safety

17  
18 Norwegian Knowledge Centre for the Health Services

19  
20 PO Box 7004 St. Olavs plass,

21  
22 0130 Oslo

23  
24 Norway

25  
26  
27  
28  
29 <sup>§</sup>Corresponding author:

30  
31 Telephone: +47-46400425

32  
33 Fax: +47-23255010

34  
35 HII: [hii@nokc.no](mailto:hii@nokc.no)  
36  
37  
38  
39  
40  
41  
42  
43  
44  
45  
46  
47  
48

49  
50 Keywords: Patient satisfaction, Cancer, Survey, Reliability and validity, Confirmatory factor  
51 analysis  
52  
53  
54

55  
56 3965 words  
57  
58  
59  
60

## ABSTRACT

### Objectives

Patient experience questionnaires have been criticised due to the lack of supporting psychometric evidence. The objective of this study was to describe the development and psychometric evaluation of the Cancer Patient Experiences Questionnaire (CPEQ) in Norway.

### Design

Questionnaire development was based on a literature review of existing questionnaires, patient interviews, expert-group consultations, pretesting of questionnaire items and a national survey. Psychometric evaluation included exploratory and confirmatory factor analysis, and tests of internal consistency reliability and test-retest reliability.

### Setting

Data were collected using a postal survey of cancer patients attending 54 hospitals in all 4 health regions. The subjects were 14,227 adult cancer patients who had attended an outpatient clinic or who had been discharged from an inpatient ward. Patients with all types of cancer were included. Data quality, internal consistency reliability and construct validity were assessed.

### Results

Of the 13,846 patients who received the CPEQ, 7212 (52%) responded. Exploratory factor analysis identified six scales of outpatient experiences relating to nurse contact, doctor contact, information, organisation, patient safety and contact with next of kin, and seven scales of inpatient experiences, with the addition of hospital standard to the aforementioned

1  
2  
3 scales. All but two of the scales met the criterion of 0.70 for Cronbach's alpha testing, and  
4  
5 test-retest correlations ranged from 0.57 to 0.85. Confirmatory factor analysis supported the  
6  
7 interpretation of six and seven scales for outpatients and inpatients, respectively. Statistically  
8  
9 significant associations based on explicit hypotheses provided evidence for the construct  
10  
11 validity of the scales. One additional scale measuring the hospital level was identified  
12  
13 ( $\alpha=0.85$ ).  
14  
15  
16  
17  
18

### 19 **Conclusions**

20 The CPEQ is a self-report instrument that includes the most important aspects of patient  
21  
22 experiences with cancer care at hospitals. The instrument was tested following a national  
23  
24 survey in Norway; good evidence is provided herein for the internal consistency reliability,  
25  
26 test-retest reliability and construct validity.  
27  
28  
29  
30  
31  
32  
33  
34  
35  
36  
37  
38  
39  
40  
41  
42  
43  
44  
45  
46  
47  
48  
49  
50  
51  
52  
53  
54  
55  
56  
57  
58  
59  
60

## ARTICLE SUMMARY

### Article focus

- To describe the development and evaluation of the Cancer Patient Experiences Questionnaire (CPEQ).
- Data quality, internal consistency reliability and construct validity were assessed.

### Key messages

- Patient satisfaction questionnaires have generally been criticised due to the lack of supporting psychometric evidence, including reliability and validity data.
- Valid and reliable measures for the measurement of cancer patients' experiences with hospitals are crucial if the data are to be used in quality improvement, business control and by both patients and the general public.

### Strengths and limitations of this study

- The strengths of the present study include the psychometric assessment of the CPEQ following a national survey, including data quality, dimensionality, internal consistency and construct validity.
- The scale could prove useful for evaluating cancer patients' experiences with hospitals in Norway and in similar settings in other countries, and includes the most important aspects regarding both inpatient and outpatient hospital care from the patient perspective.
- Further investigation of the explanatory characteristics of variations in cancer patients' experience with health care is warranted.



## INTRODUCTION

The measurement of patient experiences is now recognised as an important part of health-care performance evaluation. Patient experiences are included as one of three core quality dimensions in the Organisation for Economic Cooperation and Development quality indicator framework,[1] and are central to the framework of the World Health Organisation for assessing the performance of health systems.[2] Several studies have shown that patient experiences are positively related to patient satisfaction [3, 4] and that patient satisfaction is positively associated with compliance [5] and health outcomes.[4] Eliciting feedback from patients helps health-care providers to identify potential areas for improvement, which in turn can increase the quality of health care.

The acquisition of valid information requires patient experiences to be measured using rigorously developed and validated tools. Patient satisfaction questionnaires have generally been criticised due to the lack of supporting psychometric evidence, including reliability and validity data. A review of 195 patient satisfaction papers published in 1994 found that the satisfaction instruments presented little evidence of reliability or validity,[6] casting doubt on the credibility of the resultant findings. Furthermore, questionnaires that ask patients to rate their care in terms of how satisfied they are tend to elicit very positive ratings.[4] A more valid approach is to ask patients to report in detail on their experiences by asking them specific questions about certain processes and events; this will provide results that can be easily interpreted and acted upon.[7]

Norway has a national patient experience survey program that is run by the Norwegian Knowledge Centre for the Health Services. The purpose of the program is to systematically measure user experiences with health care, to provide data for quality improvement, business

1  
2  
3 control, hospital choice and public accountability. Due to the aforementioned problems that  
4  
5 arise when attempts are made to measure satisfaction, the instruments focus on experiences of  
6  
7 the healthcare delivery, not satisfaction. In 2007, the Ministry of Health in Norway decided to  
8  
9 measure cancer patients' experiences with hospitals. The Norwegian Knowledge Centre for  
10  
11 the Health Services has developed and validated several generic instruments to be used in  
12  
13 national patient experience surveys,[8–19] but none specifically for cancer patients. Ensuring  
14  
15 the sensitivity of the instrument and detecting changes that are significant for the patient  
16  
17 requires instruments specific to the study objective as well as the population of interest to be  
18  
19 developed.[20] A review of the literature was conducted to determine whether there was an  
20  
21 instrument that included multidimensional scales including different aspects of cancer patient  
22  
23 experiences. Two national surveys of patients' experiences of cancer services have been  
24  
25 carried out in the UK: the first in 1999–2000 by the National Patient Survey Programme [21]  
26  
27 and the second in 2004 by the National Audit Office.[22] However, these surveys included  
28  
29 only six types of cancer: breast, colorectal, lung, ovarian, prostate and non-Hodgkin's  
30  
31 lymphoma. Other questionnaires identified in the review typically addressed quality of life, or  
32  
33 involved specific cancer types, treatments, services or clinical staff; no measures appropriate  
34  
35 for all cancer types, including assessment of inpatient and outpatient cancer care, were  
36  
37 identified. Consequently, the literature review identified shortcomings with existing measures,  
38  
39 and it was decided to develop a new instrument to measure the experiences of hospital care of  
40  
41 both inpatients and outpatients that could be used in a future national survey in Norway.  
42  
43  
44  
45  
46  
47  
48

49 This paper describes the development and evaluation of the Cancer Patient Experiences  
50  
51 Questionnaire (CPEQ). This tool was designed for application in a national survey of adult  
52  
53 cancer patients, whereby the results are published in the form of reports for the public, the  
54  
55  
56  
57  
58  
59  
60

1  
2  
3 government and individual health-care units as a basis for national surveillance, quality  
4  
5 improvement and hospital choice.  
6  
7

## 8 9 **METHODS**

### 10 **Questionnaire development**

11  
12 The questionnaire was developed based on the findings of a literature review of  
13  
14 questionnaires aimed to determine cancer patients' experiences with hospitals, semi-  
15  
16 structured interviews with 13 cancer patients, and focus groups of experts including clinicians  
17  
18 and representatives for cancer patient organisations. This process was designed to ensure  
19  
20 content validity and that the questionnaire addresses important aspects of cancer patient  
21  
22 experiences of care, and to establish a model for including participants in the survey. The  
23  
24 development of the questionnaire also followed previous work in the identification of  
25  
26 domains and items of relevance for the patients.[8–19] We tested the questionnaire by  
27  
28 performing cognitive interviews with 12 cancer patients and a pilot study of 953 cancer  
29  
30 patients at a single hospital. The cognitive interviews and the pilot study suggested minor  
31  
32 changes to the questionnaire, which were discussed within the group of experts before  
33  
34 finalisation.  
35  
36  
37  
38  
39

40  
41  
42 We asked the patients about their overall experiences with a specific hospital. The  
43  
44 questionnaire was divided into separate sections for inpatients and outpatients, consisting  
45  
46 mainly of the same questions, except for six questions included in the inpatient section about  
47  
48 hospital standards and waiting time. The questionnaire also included items concerning aspects  
49  
50 of care irrespective of out- or inpatient settings, as well as sociodemographic and health-status  
51  
52 questions. The final questionnaire comprised 127 items. Items relating to experiences of care  
53  
54 had a five-point scale that range from “not at all” (1) to “a very large extent” (5). Negative  
55  
56  
57  
58  
59  
60

1  
2  
3 items were reverse coded, and a higher score represent a better experience for all items. Scales  
4  
5 were transformed to scores ranging from 0 to 100 where 100 is the best possible. In this study  
6  
7 we enquired about experiences that do not apply to all patients but which are considered  
8  
9 important to the relevant patients. Consequently, the levels of missing data were expected to  
10  
11 reflect patients being at different stages of cancer treatment and having varying levels of  
12  
13 experience with hospital care.  
14  
15

### 16 17 18 **Data collection** 19

20 The questionnaire was mailed to 14,227 patients with all types of cancer aged 16 years or  
21  
22 older who had at least one outpatient appointment or a hospital stay at a Norwegian hospital  
23  
24 from 20 September to 10 December 2009. A maximum of 400 patients from each of the 54  
25  
26 hospitals was included; 400 patients were selected randomly from hospitals with more than  
27  
28 400 eligible patients. Power calculations have been conducted at the hospital level, resulting  
29  
30 in an appropriate sample size of 400 for each hospital. When presenting population estimates,  
31  
32 individual weights are used to adjust for non-response. These are also related to the size of the  
33  
34 hospital populations so that results at higher levels (health enterprise, regions and the nation)  
35  
36 take into account differences in hospital size. The hospitals had the opportunity to exclude  
37  
38 patients who were not considered applicable to participate in a survey, and the patients  
39  
40 themselves could withdraw from the survey at any time by contacting the hospital. Checks  
41  
42 were undertaken to ensure that patients were not sent more than one questionnaire, and the  
43  
44 first hospital episode with a cancer registration was taken as the episode to use in the survey  
45  
46 sample for patients who appeared on the lists more than once. Units for palliative care and  
47  
48 birth and maternity departments were excluded from the survey. The questionnaires were  
49  
50 mailed to the patients by the end of January to mid-May 2010. Non-responders were sent one  
51  
52 reminder after 3 weeks. We also mailed a retest questionnaire to 291 consenting patients  
53  
54  
55  
56  
57  
58  
59  
60

1  
2  
3 approximately 1 week after their first reply for the purpose of assessing test-retest reliability.

4  
5 After the completion of data collection the patient contact information was deleted and the  
6  
7 hospitals transferred the demographic, clinical and administrative data, which were merged  
8  
9 with the patients' responses.  
10

11  
12  
13  
14 The survey was approved by the Norwegian Regional Committee for Medical Research  
15  
16 Ethics, the Data Inspectorate, and the Ministry of Health and Care Services.  
17  
18  
19

### 20 21 **Statistical analysis**

22  
23 Most statistical analyses were carried out using SPSS version 15.0. Confirmatory factor  
24  
25 analyses (CFAs) were conducted using the linear structural relation (LISREL) analysis  
26  
27 program. STREAMS (Structural Equation Modelling Made Simple) offers an interface to the  
28  
29 LISREL program and was used as a support.[23]  
30  
31

32  
33  
34 Separate exploratory factor analyses (EFAs) were carried out for outpatients and inpatients  
35  
36 using principal axis factoring. We expected some correlations among the factors and chose  
37  
38 oblique rotation (promax). The criterion for the number of factors to be rotated was  
39  
40 eigenvalues greater than 1, and items with factor loadings lower than 0.4 were excluded.  
41  
42

43  
44  
45 Cronbach's alpha coefficient was calculated to determine the internal consistency of the  
46  
47 scales. An alpha value greater than 0.70 is considered satisfactory.[24, 25] Internal  
48  
49 consistency was also assessed by item-total correlation, measuring the strength of the  
50  
51 association between an individual item and the total score of the remainder of its scale. A  
52  
53 correlation coefficient of 0.30 or higher has been recommended previously.[26] The intraclass  
54  
55 correlation coefficient was used as an estimate of the test-retest reliability, and was used to  
56  
57  
58  
59  
60

1  
2  
3 assess the correlation between scores obtained at different times for each scale; the estimated  
4  
5 coefficients should exceed 0.7.[24]  
6  
7

8  
9  
10 The item structure from EFAs was used to construct theoretically derived scales. CFA was  
11  
12 applied to further test the relationship between the observed variables and their underlying  
13  
14 latent constructs identified from the EFAs. The LISREL analysis program was used to test the  
15  
16 goodness of fit of the models [27] using various fit indexes, including the root mean square  
17  
18 error of approximation (RMSEA), the goodness-of-fit index (GFI), the comparative fit index  
19  
20 (CFI) and the incremental fit index (IFI). An RMSEA of 0.05 or less, and a GFI and CFI of  
21  
22 0.90 or above are generally taken to indicate a good fit. The IFI values range from 0 to 1, with  
23  
24 larger values indicating a better goodness of fit.  
25  
26  
27

28  
29  
30 Construct validity refers to whether a scale measures or is correlated with the theorised  
31  
32 scientific construct, and was assessed by exploring the associations of scale scores as well as  
33  
34 their associations with additional items not included in the scales. A systematic review  
35  
36 identified 139 articles that provided evidence about determinants of satisfaction,[4] and  
37  
38 concluded that satisfaction was linked to prior satisfaction, predisposition, utilisation, granting  
39  
40 of desires, health status, health outcomes and age. Evidence about the effects of gender,  
41  
42 ethnicity, socioeconomic status and expectations was equivocal. Following the literature  
43  
44 review and previous findings,[4–17] it was hypothesised that scale scores would be correlated  
45  
46 with global satisfaction, age, gender and health status. Time since cancer diagnosis and  
47  
48 whether the treatment provided was considered the best possible were also hypothesised as  
49  
50 potential determinants.  
51  
52  
53  
54  
55  
56  
57  
58  
59  
60

## RESULTS

### Data collection

Of the 14,227 questionnaires that were mailed to cancer patients, 137 were returned due to erroneous addresses, and 244 of the patients had died. Accordingly, the adjusted total sample was 13,846 patients, of which 7212 responded (52%), 6642 patients with experiences from outpatient wards and 4856 patients from inpatient wards; 4460 patients had attended both inpatient and outpatient wards at the hospital. Table 1 lists the characteristics of the respondents.

Table 1. Patient characteristics. Except where stated otherwise, data are *n* (%) values.

| Variable                             | Outpatients<br>(N=6642) | Inpatients<br>(N=4856) | All respondents<br>(N=7212)<br><i>n</i> (%) |
|--------------------------------------|-------------------------|------------------------|---------------------------------------------|
| <b>Gender</b>                        |                         |                        |                                             |
| Male                                 | 3733 (56)               | 2590 (53)              | 4049 (56)                                   |
| Female                               | 2908 (44)               | 2265 (47)              | 3162 (44)                                   |
| <b>Age in years (mean±SD)</b>        | 66±12.2                 | 66±12.2                | 66±12.1                                     |
| <b>Education level</b>               |                         |                        |                                             |
| Primary school                       | 1742 (27)               | 1319 (28)              | 1947 (28)                                   |
| High school                          | 2408 (38)               | 1831 (39)              | 2608 (38)                                   |
| University undergraduate             | 1425 (22)               | 983 (21)               | 1519 (22)                                   |
| University postgraduate              | 838 (13)                | 557 (12)               | 884 (13)                                    |
| <b>Native language</b>               |                         |                        |                                             |
| Norwegian                            | 6324 (97)               | 4628 (97)              | 6858 (97)                                   |
| Sami                                 | 7 (0)                   | 6 (0)                  | 7 (0)                                       |
| Other Nordic                         | 59 (1)                  | 35 (1)                 | 64 (1)                                      |
| Other European                       | 92 (1)                  | 70 (2)                 | 100 (1)                                     |
| Non-European                         | 35 (1)                  | 30 (1)                 | 39 (1)                                      |
| <b>Main activity</b>                 |                         |                        |                                             |
| Work                                 | 1556 (24)               | 1128 (24)              | 1670 (24)                                   |
| Sick leave                           | 1270 (20)               | 994 (21)               | 1369 (19)                                   |
| Retired                              | 3537 (54)               | 2516 (53)              | 3860 (55)                                   |
| Education                            | 33 (1)                  | 27 (1)                 | 35 (1)                                      |
| Home worker                          | 52 (1)                  | 43 (1)                 | 56 (1)                                      |
| Unemployed                           | 24 (0)                  | 18 (0)                 | 28 (0)                                      |
| Other                                | 50 (1)                  | 43 (1)                 | 56 (1)                                      |
| <b>Marital status</b>                |                         |                        |                                             |
| Married                              | 4559 (71)               | 3302 (70)              | 4941 (71)                                   |
| Cohabitant                           | 529 (8)                 | 409 (9)                | 579 (8)                                     |
| Neither married nor cohabitant       | 1347 (21)               | 991 (21)               | 1457 (21)                                   |
| <b>Type of cancer (ICD-10 codes)</b> |                         |                        |                                             |
| Breast                               | 884 (13)                | 669 (14)               | 932 (13)                                    |
| Female genitalia                     | 452 (7)                 | 363 (8)                | 489 (7)                                     |
| Male genitalia                       | 1449 (22)               | 822 (17)               | 1591 (22)                                   |
| Skin                                 | 493 (7)                 | 119 (3)                | 512 (7)                                     |
| Respiratory organs                   | 347 (5)                 | 273 (6)                | 386 (5)                                     |
| Urinary tract                        | 697 (11)                | 641 (13)               | 751 (10)                                    |
| Digestive organs                     | 866 (13)                | 860 (18)               | 984 (14)                                    |
| Blood                                | 1031 (16)               | 728 (15)               | 1103 (15)                                   |
| Other                                | 422 (6)                 | 380 (8)                | 463 (6)                                     |
| <b>Time since diagnosis</b>          |                         |                        |                                             |
| Less than 3 months                   | 171 (3)                 | 132 (3)                | 209 (3)                                     |
| 3–6 months                           | 807 (12)                | 562 (12)               | 929 (13)                                    |
| 6–12 months                          | 1192 (18)               | 840 (18)               | 1295 (18)                                   |
| 1–2 years                            | 1205 (18)               | 883 (19)               | 1286 (18)                                   |
| 2–5 years                            | 1740 (27)               | 1286 (27)              | 1864 (26)                                   |
| More than 5 years                    | 1424 (22)               | 1070 (22)              | 1498 (21)                                   |
| <b>Type of contact</b>               |                         |                        |                                             |
| Examination                          | 3876 (58)               | 2747 (57)              | -                                           |
| Surgery                              | 1928 (29)               | 3189 (66)              | -                                           |
| Radiotherapy                         | 1082 (16)               | 510 (11)               | -                                           |
| Chemotherapy                         | 2345 (35)               | 1181 (24)              | -                                           |
| Hormone therapy                      | 663 (10)                | 220 (5)                | -                                           |
| Control/follow up                    | 4456 (67)               | 1960 (40)              | -                                           |
| Other                                | 492 (7)                 | 570 (12)               | -                                           |

*N*, total number; *n*, number of responses received; ICD-10, International Classification of Diseases, 10th Revision



### Data quality and psychometric evaluation

The levels of missing data and descriptive statistics for the items are presented in Table 2. The levels of missing data ranged from 2% to 12%, which can be considered as acceptable for most items. Responses in the category “not applicable” ranged from 2% to 33%. However, since the questionnaire was intended to apply to all cancer patients, rates of not applicable or missing data higher than 10% were accepted. Mean scores for single items were generally skewed towards a positive rating (Table 2). The mean scores were lowest (at 3.2 for both outpatients and inpatients) for information about pain and pain alleviation. The mean scores were highest for items about patient safety, and ranged from 4.5 to 4.7.

Separate EFAs were conducted for outpatients and inpatients. Results from the first factor analyses for both outpatients and inpatients showed that most of the items addressing organisation loaded on the first factor, which related to nurse contact. For outpatients, this was also the case for items about contact with next of kin. Based on both empirical and theoretical assumptions, summed rating scales were constructed for organisation (outpatients and inpatients) and contact with next of kin (outpatients).

Further analyses where these items were omitted produced four factors for outpatients and six for inpatients (see Table 2). All item-total correlation coefficients exceeded the 0.4 criterion (range 0.41–0.86). The four factors related to outpatients’ experiences were nurse contact, doctor contact, information and patient safety; the alpha values ranged from 0.61 to 0.92. The four-factor solution accounted for 62% of the total variance. The same four factors were produced for inpatients, comprising the equivalent items, as well as two other factors (contact with next of kin and hospital standard); the alpha values ranged from 0.67 to 0.94. These six factors explained 63% of the total variance in the scores for inpatients’ experiences. Table 2

1  
2  
3 lists the factor loadings. All factor loadings for the items exceeded 0.4, and no item had a  
4  
5 cross-loading greater than or equal to 0.40.  
6  
7

8  
9 Alpha values for 11 of the 13 scales satisfied the criterion of 0.70 or higher (Table 2).

10  
11 Cronbach's alpha is sensitive to the number of test items, and the two patient safety scales  
12  
13 that did not meet the criterion of 0.70 (0.614 and 0.667) had three test items each. Item-total  
14  
15 correlation coefficients showed that all items satisfied the stated criterion of 0.40, and it was  
16  
17 decided to keep the six scales for measuring outpatient experiences and the seven scales for  
18  
19 measuring inpatient experiences. Of the 291 patients mailed a retest questionnaire, 229  
20  
21 responded (79%). Table 2 lists the results of the test-retest correlations for the 13 scales. The  
22  
23 test-retest correlation coefficients ranged from 0.57 to 0.81 for outpatients and from 0.62 to  
24  
25 0.85 for inpatients.  
26  
27  
28  
29  
30  
31  
32  
33  
34  
35  
36  
37  
38  
39  
40  
41  
42  
43  
44  
45  
46  
47  
48  
49  
50  
51  
52  
53  
54  
55  
56  
57  
58  
59  
60

Table 2. Descriptive statistics<sup>a</sup>, factor loadings and internal consistency for outpatients and inpatients.

| Scale/item                           | Outpatients (N=6642) |                    |                   |      |                 |                                                     |                                              | Inpatients (N=4856) |                    |                   |      |                 |                                                     |                                              |
|--------------------------------------|----------------------|--------------------|-------------------|------|-----------------|-----------------------------------------------------|----------------------------------------------|---------------------|--------------------|-------------------|------|-----------------|-----------------------------------------------------|----------------------------------------------|
|                                      | Missing (%)          | Does not apply (%) | Mean <sup>a</sup> | SD   | Factor loadings | Cronbach's alpha/item-total correlation coefficient | Test-retest reliability <sup>b</sup> (n=229) | Missing (%)         | Does not apply (%) | Mean <sup>a</sup> | SD   | Factor loadings | Cronbach's alpha/item-total correlation coefficient | Test-retest reliability <sup>b</sup> (n=229) |
| <b>Nurse contact</b>                 |                      |                    | 79.8              |      |                 | 0.92                                                | 0.73                                         |                     |                    | 76.8              |      |                 | 0.93                                                | 0.83                                         |
| 1. Updated about your treatment      | 5                    | 9                  | 4.2               | 0.74 | 0.63            | 0.72                                                |                                              | 5                   | 5                  | 4.1               | 0.77 | 0.66            | 0.77                                                |                                              |
| 2. Followed up on side effects       | 6                    | 29                 | 4.0               | 0.94 | 0.64            | 0.73                                                |                                              | 6                   | 24                 | 4.0               | 0.85 | 0.75            | 0.78                                                |                                              |
| 3. Took your concerns seriously      | 6                    | 19                 | 4.2               | 0.79 | 0.80            | 0.81                                                |                                              | 6                   | 13                 | 4.1               | 0.81 | 0.93            | 0.84                                                |                                              |
| 4. Cared for you                     | 7                    | -                  | 4.4               | 0.70 | 0.88            | 0.79                                                |                                              | 5                   | -                  | 4.3               | 0.73 | 0.85            | 0.81                                                |                                              |
| 5. Provided enough time for dialogue | 8                    | -                  | 3.9               | 0.96 | 0.70            | 0.75                                                |                                              | 5                   | -                  | 3.6               | 0.99 | 0.63            | 0.75                                                |                                              |
| 6. Was understandable                | 7                    | -                  | 4.3               | 0.70 | 0.72            | 0.73                                                |                                              | 5                   | -                  | 4.2               | 0.70 | 0.62            | 0.72                                                |                                              |
| 7. Was competent                     | 8                    | -                  | 4.3               | 0.68 | 0.67            | 0.71                                                |                                              | 5                   | -                  | 4.2               | 0.72 | 0.60            | 0.74                                                |                                              |
| <b>Doctor contact</b>                |                      |                    | 77.6              |      |                 | 0.92                                                | 0.81                                         |                     |                    | 75.8              |      |                 | 0.93                                                | 0.85                                         |
| 1. Updated about your treatment      | 5                    | 5                  | 4.3               | 0.77 | 0.65            | 0.73                                                |                                              | 6                   | 4                  | 4.2               | 0.76 | 0.77            | 0.76                                                |                                              |
| 2. Followed up on side effects       | 7                    | 30                 | 3.8               | 0.98 | 0.62            | 0.72                                                |                                              | 8                   | 28                 | 3.8               | 0.93 | 0.55            | 0.75                                                |                                              |
| 3. Took your concerns seriously      | 6                    | 15                 | 4.0               | 0.87 | 0.83            | 0.83                                                |                                              | 7                   | 14                 | 4.0               | 0.85 | 0.82            | 0.84                                                |                                              |
| 4. Cared for you                     | 6                    | -                  | 4.1               | 0.85 | 0.93            | 0.83                                                |                                              | 6                   | -                  | 4.0               | 0.86 | 0.94            | 0.84                                                |                                              |
| 5. Provided enough time for dialogue | 5                    | -                  | 3.8               | 0.98 | 0.85            | 0.79                                                |                                              | 7                   | -                  | 3.6               | 1.01 | 0.82            | 0.79                                                |                                              |
| 6. Was understandable                | 6                    | -                  | 4.2               | 0.77 | 0.72            | 0.75                                                |                                              | 6                   | -                  | 4.1               | 0.77 | 0.74            | 0.73                                                |                                              |
| 7. Was competent                     | 5                    | -                  | 4.4               | 0.72 | 0.66            | 0.72                                                |                                              | 6                   | -                  | 4.4               | 0.71 | 0.73            | 0.74                                                |                                              |
| <b>Information</b>                   |                      |                    | 67.0              |      |                 | 0.92                                                | 0.79                                         |                     |                    | 65.3              |      |                 | 0.94                                                | 0.78                                         |
| 1. Your illness                      | 2                    | 3                  | 3.9               | 0.87 | 0.47            | 0.73                                                |                                              | 4                   | 5                  | 3.8               | 0.96 | 0.47            | 0.76                                                |                                              |
| 2. Treatment options                 | 3                    | 8                  | 3.9               | 0.95 | 0.51            | 0.72                                                |                                              | 4                   | 11                 | 3.8               | 1.03 | 0.55            | 0.76                                                |                                              |
| 3. Examination and test results      | 3                    | 2                  | 4.0               | 0.91 | 0.41            | 0.67                                                |                                              | 4                   | 4                  | 3.9               | 0.96 | 0.44            | 0.72                                                |                                              |
| 4. Side effects of treatment         | 4                    | 14                 | 3.5               | 1.13 | 0.85            | 0.82                                                |                                              | 5                   | 18                 | 3.5               | 1.14 | 0.91            | 0.85                                                |                                              |
| 5. Effects of treatment              | 5                    | 13                 | 3.7               | 1.03 | 0.82            | 0.83                                                |                                              | 6                   | 14                 | 3.6               | 1.05 | 0.86            | 0.86                                                |                                              |
| 6. Pain to be expected               | 4                    | 18                 | 3.2               | 1.24 | 0.96            | 0.80                                                |                                              | 5                   | 17                 | 3.2               | 1.20 | 0.96            | 0.82                                                |                                              |
| 7. Pain relief                       | 5                    | 21                 | 3.2               | 1.26 | 0.92            | 0.77                                                |                                              | 6                   | 19                 | 3.3               | 1.18 | 0.91            | 0.80                                                |                                              |
| <b>Organisation</b>                  |                      |                    | 71.4              |      |                 | 0.78                                                | 0.77                                         |                     |                    | 69.0              |      |                 | 0.82                                                | 0.85                                         |
| 1. Cooperation between hospital      | 7                    | 21                 | 3.8               | 0.91 | -               | 0.59                                                |                                              | 7                   | 22                 | 3.8               | 0.95 |                 | 0.64                                                |                                              |

|                                                 |    |    |      |      |       |      |      |    |    |      |      |       |      |      |
|-------------------------------------------------|----|----|------|------|-------|------|------|----|----|------|------|-------|------|------|
| departments                                     |    |    |      |      |       |      |      |    |    |      |      |       |      |      |
| 2. Staff collaboration                          | 6  | 10 | 4.1  | 0.77 | -     | 0.64 |      | 6  | 8  | 4.0  | 0.78 |       | 0.71 |      |
| 3. Information provided to the correct person   | 8  | -  | 4.0  | 0.90 | -     | 0.52 |      | 8  | -  | 3.9  | 0.88 |       | 0.65 |      |
| 4. Same group of nurses                         | 10 | -  | 3.6  | 1.14 | -     | 0.49 |      | 5  | -  | 3.4  | 1.04 |       | 0.55 |      |
| 5. Multiple doctors involved was a problem      | 6  | 26 | 3.8  | 1.18 | -     | 0.47 |      | 7  | 18 | 3.8  | 1.14 |       | 0.49 |      |
| 6. One doctor responsible                       | 6  | -  | 3.8  | 1.24 | -     | 0.51 |      | 7  | -  | 3.7  | 1.23 |       | 0.55 |      |
| <b>Patient safety</b>                           |    |    | 90.6 |      |       | 0.61 | 0.57 |    |    | 90.5 |      |       | 0.67 | 0.62 |
| 1. Information deliberately held back           | 4  | -  | 4.5  | 0.87 | -0.57 | 0.44 |      | 5  | -  | 4.6  | 0.80 | -0.64 | 0.49 |      |
| 2. Contradictory information about illness      | 6  | -  | 4.7  | 0.74 | -0.55 | 0.43 |      | 6  | -  | 4.6  | 0.79 | -0.70 | 0.48 |      |
| 3. Perceived incorrect treatment                | 5  | 11 | 4.7  | 0.81 | -0.52 | 0.41 |      | 6  | 7  | 4.6  | 0.82 | -0.66 | 0.47 |      |
| <b>Contact with next of kin</b>                 |    |    | 80.9 |      |       | 0.87 | 0.65 |    |    | 79.9 |      |       | 0.85 | 0.81 |
| 1. Received next of kin                         | 6  | 33 | 4.3  | 0.80 | -     | 0.77 |      | 7  | 17 | 4.2  | 0.77 | 0.75  | 0.76 |      |
| 2. Arranged for next of kin to be present       | 6  | 33 | 4.2  | 0.91 | -     | 0.77 |      | 7  | 22 | 4.1  | 0.87 | 0.88  | 0.78 |      |
| 3. Arranged for interaction with visitors       | -  | -  | -    | -    | -     | -    |      | 6  | 10 | 4.2  | 0.75 | 0.67  | 0.64 |      |
| <b>Hospital standard</b>                        |    |    | -    |      |       | -    | -    |    |    | 71.3 |      |       | 0.74 | 0.75 |
| 1. Arranged for interaction with other patients | -  | -  | -    | -    | -     | -    |      | 6  | -  | 3.9  | 0.85 | 0.45  | 0.50 |      |
| 2. Physical environment                         | -  | -  | -    | -    | -     | -    |      | 12 | -  | 3.6  | 0.94 | 0.66  | 0.58 |      |
| 3. Food                                         | -  | -  | -    | -    | -     | -    |      | 7  | -  | 4.0  | 0.88 | 0.65  | 0.53 |      |
| 4. Cleanliness                                  | -  | -  | -    | -    | -     | -    |      | 7  | -  | 3.9  | 0.89 | 0.62  | 0.54 |      |

<sup>a</sup> Items are scored 1–5 and scales are scored 0–100, where a higher score represents a better experience.

<sup>b</sup> Intraclass correlation coefficient (ICC).

1  
2  
3 CFAs were applied to examine the hypothesised factor structures. The measurement part  
4 specifies the relationship of the latent to the observed variables, and the structural part of the  
5 models specifies the relationship among the latent variables. First, the six-factor solution of  
6 the outpatient experiences was tested, which revealed that there was a satisfactory model fit to  
7 the data ( $\chi^2=23559.96$ ,  $p<0.001$ ,  $df=458$ ,  $RMSEA=0.091$ ,  $GFI=0.81$ ,  $CFI=0.96$  and  $IFI=0.96$ ).  
8 The results are shown in Figure 1. The exogenous, latent variables were the six factors, and  
9 the endogenous, latent variable was outpatient experiences, introducing a second-order  
10 analysis examining the correlations among the first-order factors to examine predictions on  
11 the endogenous variable. Organisation was the strongest predictor ( $\beta=0.95$ ), but nurse contact  
12 ( $\beta=0.89$ ), doctor contact ( $\beta=0.88$ ) and information ( $\beta=0.76$ ) were also strongly associated  
13 with the endogenous, latent variable. This was also the case for contact with next of kin  
14 ( $\beta=0.61$ ) and patient safety ( $\beta=0.60$ ). Second, the seven-factor solution of the inpatient  
15 experiences was tested, which indicated a slightly better fit ( $\chi^2=26697.60$ ,  $p<0.001$ ,  $df=621$ ,  
16  $RMSEA=0.083$ ,  $GFI=0.81$ ,  $CFI=0.97$  and  $IFI=0.97$ ; Figure 2). The results were consistent  
17 with those of the previous CFA; the inpatient experiences factor was strongly affected by  
18 organisation ( $\beta=0.93$ ), nurse contact ( $\beta=0.89$ ), doctor contact ( $\beta=0.89$ ), information ( $\beta=0.77$ ),  
19 contact with next of kin ( $\beta=0.70$ ) and hospital standard ( $\beta=0.70$ ). The prediction from patient  
20 safety was slightly lower ( $\beta=0.56$ ).  
21  
22  
23  
24  
25  
26  
27  
28  
29  
30  
31  
32  
33  
34  
35  
36  
37  
38  
39  
40  
41  
42  
43  
44  
45

46 Table 3 gives the results of construct validity testing. The correlations between the scale  
47 scores were all significant at the  $p<0.001$  level (range of correlation coefficients, 0.27–0.77).  
48 The correlations were weakest for the patient safety scales and the other scales, and strongest  
49 for organisation and doctor contact. The correlations between scale scores and other single  
50 items were strongest for the patients' confidence in that the treatment received was the best  
51 possible, with the correlation coefficients ranging from 0.43 to 0.70. Overall satisfaction and  
52  
53  
54  
55  
56  
57  
58  
59  
60

1  
2  
3 overall experiences were moderately to strongly correlated to the scales (range of correlation  
4 coefficients, 0.24–0.59), with all correlations significant at the  $p<0.001$  level. A significant  
5 correlation was also found between all of the scales and the patients' health status, indicating  
6 that patients with poorer health scored substantially lower on all scales. Age and time since  
7 cancer diagnosis were more weakly correlated with the scales. Results from *t*-tests showed  
8 significant but small differences between men and women on four scales. Relative to women,  
9 male outpatients had significantly lower scores on the contact with next of kin scale ( $t=-2.03$ ,  
10  $p<0.05$ ); however, male inpatients had higher scores for nurse contact ( $t=2.79$ ,  $p<0.01$ ),  
11 organisation ( $t=3.78$ ,  $p<0.001$ ) and hospital standard ( $t=6.84$ ,  $p<0.001$ ).  
12  
13  
14  
15  
16  
17  
18  
19  
20  
21  
22  
23  
24  
25  
26  
27  
28  
29  
30  
31  
32  
33  
34  
35  
36  
37  
38  
39  
40  
41  
42  
43  
44  
45  
46  
47  
48  
49  
50  
51  
52  
53  
54  
55  
56  
57  
58  
59  
60

1  
2  
3  
4  
5  
6  
7  
8  
9  
10  
11  
12  
13  
14  
15  
16  
17  
18  
19  
20  
21  
22  
23  
24  
25  
26  
27  
28  
29  
30  
31  
32  
33  
34  
35  
36  
37  
38  
39  
40  
41  
42  
43  
44  
45  
46  
47  
48  
49

Table 3. Correlations<sup>a</sup> between scale scores and individual items for outpatients and inpatients.

| Scale/item                                              | Outpatients (N=6642) |                     |                     |                     |                     |                          | Inpatients (N=4856) |                    |                    |                     |                     |                          |                     |
|---------------------------------------------------------|----------------------|---------------------|---------------------|---------------------|---------------------|--------------------------|---------------------|--------------------|--------------------|---------------------|---------------------|--------------------------|---------------------|
|                                                         | Nurse contact        | Doctor contact      | Information         | Organisation        | Patient safety      | Contact with next of kin | Nurse contact       | Doctor contact     | Information        | Organisation        | Patient safety      | Contact with next of kin | Hospital standard   |
| Doctor contact                                          | 0.73                 |                     |                     |                     |                     |                          | 0.75                |                    |                    |                     |                     |                          |                     |
| Information                                             | 0.64                 | 0.68                |                     |                     |                     |                          | 0.68                | 0.71               |                    |                     |                     |                          |                     |
| Organisation                                            | 0.68                 | 0.73                | 0.61                |                     |                     |                          | 0.73                | 0.77               | 0.68               |                     |                     |                          |                     |
| Patient safety                                          | 0.38                 | 0.44                | 0.38                | 0.41                |                     |                          | 0.39                | 0.44               | 0.39               | 0.40                |                     |                          |                     |
| Contact with next of kind                               | 0.63                 | 0.58                | 0.47                | 0.53                | 0.29                |                          | 0.65                | 0.61               | 0.51               | 0.55                | 0.29                |                          |                     |
| Hospital standard                                       | -                    | -                   | -                   | -                   | -                   | -                        | 0.55                | 0.50               | 0.42               | 0.48                | 0.27                | 0.55                     |                     |
| Overall satisfaction with service                       | 0.51                 | 0.51                | 0.51                | 0.48                | 0.39                | 0.36                     | 0.59                | 0.56               | 0.52               | 0.55                | 0.40                | 0.44                     | 0.43                |
| Overall experience with service                         | 0.44                 | 0.43                | 0.45                | 0.44                | 0.24                | 0.35                     | 0.52                | 0.45               | 0.46               | 0.48                | 0.26                | 0.41                     | 0.39                |
| Confident that treatment provided was the best possible | 0.64                 | 0.69                | 0.57                | 0.61                | 0.43                | 0.54                     | 0.70                | 0.69               | 0.58               | 0.65                | 0.43                | 0.57                     | 0.48                |
| Health status                                           | -0.17                | -0.21               | -0.22               | -0.16               | -0.18               | -0.10                    | -0.23               | -0.22              | -0.24              | -0.22               | -0.18               | -0.13                    | -0.17               |
| Age                                                     | -0.04 <sup>**</sup>  | 0.02 <sup>ns</sup>  | -0.11               | -0.01 <sup>ns</sup> | 0.10                | -0.00 <sup>ns</sup>      | 0.01 <sup>ns</sup>  | 0.02 <sup>ns</sup> | -0.09              | -0.01 <sup>ns</sup> | 0.11                | 0.01 <sup>ns</sup>       | 0.08                |
| Time since cancer diagnosis                             | -0.02 <sup>ns</sup>  | -0.01 <sup>ns</sup> | -0.01 <sup>ns</sup> | -0.04 <sup>**</sup> | -0.03 <sup>ns</sup> | -0.06 <sup>**</sup>      | -0.04 <sup>**</sup> | -0.03 <sup>*</sup> | 0.01 <sup>ns</sup> | -0.05 <sup>**</sup> | -0.01 <sup>ns</sup> | -0.05 <sup>**</sup>      | -0.00 <sup>ns</sup> |

<sup>a</sup>Data are Spearman's rank correlations (*r*). All correlations are significant at *p*<0.001 except for <sup>\*\*</sup> (*p*<0.01), <sup>\*</sup> (*p*<0.05) and <sup>ns</sup> (*p*>0.05).

The questionnaire also included items about hospital care not directly related to either outpatient or inpatient wards, addressing the hospitals' extra-medical services, cooperation with the primary doctor and other community services, and information on how to manage future problems. The items had high levels of responses in the category "not applicable" (range, 12–63) indicating that they are not relevant to a high proportion of the respondents. Table 4 indicates that the items have lower mean scores than those included in the other factors, ranging from 2.5 to 3.4. Factor analysis revealed a one-factor solution accounting for 57% of the variance of the scores (Table 4). The factor loadings ranged from 0.56 to 0.79, the item-total correlation coefficients ranged from 0.52 to 0.71 and the results from reliability analysis yielded a Cronbach's alpha of 0.85. The test-retest correlation coefficient for this scale was 0.78.

Table 4. Descriptive statistics<sup>a</sup>, factor loadings and internal consistency for all patients.

| Scale/item                                              | All patients (N=7212) |                    |                   |      |                 |                                                     |                                              |
|---------------------------------------------------------|-----------------------|--------------------|-------------------|------|-----------------|-----------------------------------------------------|----------------------------------------------|
|                                                         | Missing (%)           | Does not apply (%) | Mean <sup>a</sup> | SD   | Factor loadings | Cronbach's alpha/item-total correlation coefficient | Test-retest reliability <sup>b</sup> (n=229) |
| <b>Extra-medical services, information, cooperation</b> |                       |                    | <b>49.2</b>       |      |                 | <b>0.85</b>                                         | <b>0.78</b>                                  |
| Hospital extra-medical services                         | 6                     | 45                 | 2.5               | 1.35 | 0.65            | 0.60                                                |                                              |
| Hospital cooperation with primary doctor                | 6                     | 16                 | 3.4               | 1.15 | 0.56            | 0.52                                                |                                              |
| Hospital cooperation with community services            | 7                     | 63                 | 2.8               | 1.37 | 0.64            | 0.60                                                |                                              |
| Information about future problems                       | 5                     | 12                 | 3.2               | 1.22 | 0.74            | 0.65                                                |                                              |
| Information about managing potential relapse            | 6                     | 19                 | 2.9               | 1.30 | 0.79            | 0.69                                                |                                              |
| Information about rehabilitation                        | 6                     | 40                 | 2.5               | 1.31 | 0.79            | 0.71                                                |                                              |

<sup>a</sup> Items are scored 1–5 and scales are scored 0–100, where a higher score represents a better experience.

<sup>b</sup> ICC.

The scale was not correlated significantly with time since cancer diagnosis, but patients with poorer health reported significantly more negative experiences, as did older patients and women (see Table 5). Results from *t*-tests showed that male patients reported significantly more positive experiences than did female patients ( $t=3.54$ ,  $p<0.001$ ).



Table 5. Correlations<sup>a</sup> between scale score and individual items for all patients.

| Scale/item                  | All patients (N=7212)<br>Extra-medical services,<br>information, cooperation |
|-----------------------------|------------------------------------------------------------------------------|
| Health status               | -0.23                                                                        |
| Age                         | -0.11                                                                        |
| Time since cancer diagnosis | -0.02 <sup>ns</sup>                                                          |

<sup>a</sup>All correlations are significant at  $p < 0.001$  except for ns ( $p > 0.05$ ).

## DISCUSSION

This study was part of the first national survey undertaken in Norway to assess cancer patients' experiences with somatic hospitals. The development of the CPEQ followed a review of the literature, interviews with cancer patients, and consultation with an expert group of professionals and researchers. The resulting questionnaire underwent a thorough process of piloting and testing for data quality, reliability and construct validity, as recommended for evaluating such questionnaires. The CPEQ addresses broad domains of cancer-related care at somatic hospitals, rather than focusing on specific treatments, cancer types or specific professionals involved in care of the patients.

The results from the survey can be used as national quality indicators in Norway and were designed to inform patient choice and for quality improvement. The CPEQ was designed specifically for use with cancer patients attending somatic hospitals, and was assumed to increase content validity from a patient perspective as well as allowing hospital staff to investigate in detail the extent to which their service meets the needs of their patients.

Questionnaires that assess specific aspects of care allow the domains where patients have poorer experiences to be identified and potentially improved.

Satisfactory evidence of internal consistency, test-retest reliability and construct validity was obtained, indicating that the CPEQ can be considered a high-quality instrument. The results of

1  
2  
3 the EFAs and tests of internal consistency provided empirical support for the scales, and  
4 confirmed that both outpatient and inpatient experiences are multidimensional concepts.  
5  
6 CFAs were supportive of the structures suggested by EFAs. There is evidence for construct  
7  
8 validity of the questionnaire following the application of hypotheses based on previous  
9  
10 research findings and theory.[7, 8–19] The results also provide support for the longitudinal  
11  
12 temporal stability of the measure. High agreement between scores administered  
13  
14 approximately 1 week apart provided good evidence of the test-retest reliability of the CPEQ.  
15  
16  
17  
18  
19

20  
21 Some limitations of the study should be considered. The levels of missing data suggest that  
22  
23 the measure is acceptable to patients. However, some of the included items were only relevant  
24  
25 for some of the respondents. It may be possible to extract a shorter version of the CPEQ with  
26  
27 fewer questions without sacrificing the psychometric qualities of the measure, but this task  
28  
29 was beyond the scope of this study. Another potential limitation is the response rate. In  
30  
31 general, postal surveys have lower response rates than other data-collection modes.[4] Non-  
32  
33 response bias occurs when the main variables differ systematically between respondents and  
34  
35 non-respondents.[28] The response rate (52%) means that almost half of the patients failed to  
36  
37 respond; however, it was relatively high compared with previous user experience surveys  
38  
39 carried out in Norway.[8–19] Findings from some of these surveys have shown that the low  
40  
41 response rates have not caused serious bias.[15, 29–32] The findings from a Norwegian  
42  
43 follow-up study involving a hospital population showed that postal respondents and non-  
44  
45 respondents had almost the same scores.[32] These studies indicate that non-response might  
46  
47 be of less concern, but uncertainty related to external validity means that more research is  
48  
49 needed on the effect of non-response in patient experience surveys on cancer care and that the  
50  
51 main findings in this study should be replicated in future studies.  
52  
53  
54  
55  
56  
57  
58  
59  
60

1  
2  
3 Consistent with previous findings,[33–35] some skewing towards positive assessment was  
4 identified. Whether this reflects truly positive experiences or low expectations is  
5 unknown.[36] As for any study based on self-reports, social desirability bias and recall bias  
6 may also have affected the results. Respondents may introduce bias in several ways, for  
7 example by giving socially desirable responses as a result of cognitive consistency pressure  
8 (making ratings congruent with their continuing use of the service) and through acquiescent  
9 response sets (a tendency always to agree or reply positively).[4] However, respondents have  
10 been shown to give more positive and socially desirable responses in interview surveys than  
11 in self-administered surveys.[37] Moreover, it is assumed that recall bias is less likely when  
12 asking about the overall experience rather than about a specific visit or hospitalisation.  
13  
14  
15  
16  
17  
18  
19  
20  
21  
22  
23  
24  
25  
26

27 Instead of developing a cancer-specific questionnaire, one of the existing generic  
28 questionnaires could potentially have been used in the national survey, such as the Patient  
29 Experience Questionnaire.[8] This would have reduced the resource requirements, and also  
30 has some empirical support. One study compared the measurement properties and the  
31 patients' evaluation of one generic and two psychiatric-specific patient satisfaction  
32 questionnaires in a sample of psychiatric patients. The results indicated that no single  
33 instrument was superior in either respect.[38] Another study identified ten generic core items  
34 covering major dimensions of experiences that patients across a range of specialist health-care  
35 services report to be important.[39] A short, generic questionnaire might be expected to give a  
36 higher response rate and better comparability than the CPEQ, but would not be suited for the  
37 purpose of a national survey in Norway. The purpose of the present study was a broad  
38 assessment of hospital cancer care. Furthermore, content validity is better for a cancer-  
39 specific questionnaire, since all activities are directed against securing validity for cancer  
40  
41  
42  
43  
44  
45  
46  
47  
48  
49  
50  
51  
52  
53  
54  
55  
56  
57  
58  
59  
60

1  
2  
3 patients, rather than to patients in general. Naturally, a national survey with a narrower focus  
4  
5 could have used a generic and perhaps shorter questionnaire.  
6  
7

8  
9 Results from the national patient experience survey program in Norway are used to develop  
10  
11 quality indicators presented both to the public and to the responsible institutions. Public use  
12  
13 includes an Internet site for free hospital choice in Norway. Research has shown that patients  
14  
15 have difficulty understanding quality information,[40] and that “less is more” in this  
16  
17 respect.[41] Therefore, an aggregated and overall measure of experiences with the hospitals  
18  
19 seems appropriate in the context of presenting information to patients. Further research is  
20  
21 needed to determine how to construct a composite score, including how to weight each of the  
22  
23 underlying subdimensions. More specific results are called for when reporting information to  
24  
25 health providers with the aim of evaluating and improving the quality of care.[33]  
26  
27

28  
29 Consequently, aggregated scores on the 13 CPEQ subdimensions might be a useful  
30  
31 supplement when reporting results to the responsible hospitals.  
32  
33

34  
35  
36 Comparing the contribution at the organisational and individual levels is relevant for  
37  
38 comparisons of hospitals based on patient evaluations. The approach for institutional  
39  
40 benchmarking in the national survey program involves developing an appropriate case-mix  
41  
42 model and correct for multiple comparisons in statistical testing. Another emerging approach  
43  
44 is to use multilevel analysis to estimate the amount of variation in scores that can be explained  
45  
46 by levels above the individual level.[42] A previous study of patient experiences found that  
47  
48 only a small part of the variation is attributable to the organisational level.[43] Future studies  
49  
50 based on the CPEQ should explore this topic further in order to elucidate the usefulness of the  
51  
52 CPEQ as a basis for quality indicators at the hospital level. This also includes research on  
53  
54 hospital-level reliability, which is based on the theory that patients who are treated at the same  
55  
56  
57  
58  
59  
60

1  
2  
3 hospital should agree regarding their assessments of that hospital. The larger the ratio of  
4  
5 between- to within-hospital variation in the scores, and the larger the number of respondents,  
6  
7 the more precise will be the measurement of differences between hospitals, and thus the  
8  
9 greater the reliability of the scores.[44]  
10

11  
12  
13  
14 Patient satisfaction questionnaires have been criticised for insufficient knowledge of their  
15  
16 reliability and validity in psychometric testing.[3] The strengths of the present study include  
17  
18 the psychometric assessment of the CPEQ following a national survey, including data quality,  
19  
20 dimensionality, internal consistency and construct validity. The scale should prove useful for  
21  
22 evaluating cancer patients' experiences with hospitals in Norway and in similar settings in  
23  
24 other countries, and includes the most important aspects regarding both inpatient and  
25  
26 outpatient hospital care from the patient perspective.  
27  
28  
29  
30

### 31 **Conclusions**

32  
33 Valid and reliable measures for the measurement of cancer patients' experiences with  
34  
35 hospitals are crucial if the data are to be used in quality improvement, business control and by  
36  
37 both patients and the general public. The CPEQ includes the most important aspects of cancer  
38  
39 patients' experiences with somatic hospitals, from the perspective of the cancer patients  
40  
41 themselves. The present study has provided strong evidence for the high data quality, internal  
42  
43 consistency, content and construct validity of this questionnaire. The questionnaire is  
44  
45 recommended for future applications designed to assess cancer patients' experiences of both  
46  
47 inpatient and outpatient care in Norway and similar settings in other countries. Further  
48  
49 investigation of the explanatory characteristics of variations in cancer patients' experience  
50  
51 with health care is warranted.  
52  
53  
54  
55  
56  
57  
58  
59  
60

## FIGURE LEGENDS

Figure 1: Confirmatory factor analysis (CFA) model for outpatients.

Figure 2: CFA model for inpatients.

## Acknowledgements

The authors thank Tomislav Dimoski at the Norwegian Knowledge Centre for Health Services, Oslo, Norway, for developing the software necessary for gathering data from the hospitals, and for conducting the data collection and quality assurance of data. We also thank Saga Høgheim and Marit Skarpaas, who carried out most of the practical tasks relating to data collection, as well as members of the expert group that contributed to the development of the questionnaire and survey design.

## Competing interests

The authors declare that they have no competing interests.

## Funding

The survey was funded by the Norwegian Ministry of Health.

## Authors' contributions

All authors contributed to the design of the questionnaire and survey. H.I.I. conducted the analysis and drafted the manuscript. H.I.I. and O.H. were involved in the data acquisition. All authors have made significant contributions by critically reviewing the manuscript and have read and approved the final version.

1  
2  
3  
4  
5  
6  
7  
8  
9  
10  
11  
12  
13  
14  
15  
16  
17  
18  
19  
20  
21  
22  
23  
24  
25  
26  
27  
28  
29  
30  
31  
32  
33  
34  
35  
36  
37  
38  
39  
40  
41  
42  
43  
44  
45  
46  
47  
48  
49  
50  
51  
52  
53  
54  
55  
56  
57  
58  
59  
60

**Data Sharing Statement**

The data from the current study are available to specific researchers at the Norwegian Knowledge Centre for Health Services.

For peer review only

**REFERENCES**

1. Kelly E, Hurst J. Health Care Quality Indicators Project: Conceptual Framework Paper. OECD Health Working Papers 23-2006. Paris: OECD, 2006.
2. Murray CJ, Frenk J. A framework for assessing the performance of health systems. *Bull World Health Organ* 2000;**78**(6):717–31.
3. Bjertnæs ØA, Sjetne IS, Iversen HH. Overall patient satisfaction with hospitals: effects of patient-reported experiences and fulfilment of expectations. *BMJ Qual Saf* 2012;**21**(1):39–46.
4. Crow R, Gage H, Hampson S, et al. The measurement of satisfaction with healthcare: implications for practice from a systematic review of the literature. *Health Technol Assess* 2002;**6**(32):1–244.
5. Barbosa CD, Balp MM, Kulich K, et al. A literature review to explore the link between treatment satisfaction and adherence, compliance, and persistence. *Patient Prefer Adherence* 2012;**6**:39–48.
6. Sitzia J. How valid and reliable are patient satisfaction data? An analysis of 195 studies. *Int J Qual Health Care* 1999;**11**(4):319–28.
7. Cleary P, Edgman-Levitan S, McMullen W, et al. The relationship between reported problems and summary evaluations of hospital care. *QRB Qual Rev Bull* 1992; **18**(2):53–9.
8. Pettersen KI, Veenstra M, Guldvog B, et al. The Patient Experiences Questionnaire: development, validity and reliability. *Int J Qual Health Care* 2004;**16**(6):453–63.
9. Garratt AM, Bjertnæs ØA, Krogstad U, et al. The OutPatient Experiences Questionnaire (OPEQ): data quality, reliability and validity in patients attending 52 Norwegian hospitals. *Qual Saf Health Care* 2005;**14**(6):433–7.



10. Garratt AM, Danielsen K, Bjertnæs ØA, et al. PIPEQ – a method for measurement of user satisfaction in mental health services. *Tidsskr Nor Laegeforen* 2006;**126**(11):1478–80.
11. Garratt AM, Bjørngaard JH, Dahle KA, et al. The Psychiatric Out-Patient Experiences Questionnaire (POPEQ): data quality, reliability, and validity in patients attending 90 Norwegian clinics. *Nord J Psychiatry* 2006;**60**(2):89–96.
12. Garratt AM, Bjertnæs ØA, Barlinn J. Parent experiences of paediatric care (PEPC) questionnaire: reliability and validity following a national survey. *Acta Paediatr* 2007;**96**(2):246–52.
13. Bjertnæs ØA, Garratt AM, Nessa J. The GPs' Experiences Questionnaire (GPEQ): reliability and validity following a national survey to assess GPs' views of district psychiatric services. *Fam Pract* 2007;**24**(4):336–42.
14. Bjertnæs ØA, Garratt A, Ruud T, et al. The General Practitioner Experiences Questionnaire (GPEQ): validity and reliability following the inclusion of new accessibility items. *Fam Pract* 2010;**27**(5):513–9.
15. Garratt AG, Bjertnæs ØA, Holmboe O, et al. Parent Experiences Questionnaire for Child and Adolescent Mental Health Services (PEQ-CAMHS): reliability and validity following a national survey. *Child Adolesc Psychiatry Ment Health* 2011;**5**:18.
16. Garratt AM, Danielsen K, Forland O, et al. The Patient Experiences Questionnaire for Out-of-Hours Care (PEQ-OHC): data quality, reliability, and validity. *Scand J Prim Health Care* 2010;**28**(2):95–101.
17. Oltedal S, Garratt A, Bjertnæs ØA, et al. The NORPEQ patient experiences questionnaire: data quality, internal consistency and validity following a Norwegian inpatient survey. *Scand J Public Health* 2007;**35**(5):540–7.

- 1  
2  
3 18. Bjertnæs ØA, Lyngstad I, Malterud K, et al. The Norwegian EUROPEP questionnaire for  
4 patient evaluation of general practice: data quality, reliability and construct validity. *Fam*  
5 *Pract* 2011;**28**(3):342–9.  
6  
7  
8  
9  
10 19. Olsen RV, Garratt AM, Iversen HH, et al. Rasch analysis of the Psychiatric Out-Patient  
11 Experiences Questionnaire (POPEQ). *BMC Health Serv Res* 2010;**10**:282.  
12  
13  
14 20. Brédart A, Morvan E, Savignoni A, et al. Respiratory Gated Radiotherapy Study Group  
15 Stic-Rar 2003. Patient's perception of care quality during radiotherapy sessions using  
16 respiratory gating techniques: validation of a specific questionnaire. *Cancer Invest.*  
17  
18 2011;**29**(2):145–52.  
19  
20  
21  
22 21. Department of Health (2002) National Survey: Cancer Patients.  
23 <http://www.dh.gov.uk/en/Publicationsandstatistics/PublishedSurvey/NationalsurveyofNH>  
24 [Spatients/Nationalsurveycancer/index.htm](http://www.dh.gov.uk/en/Publicationsandstatistics/PublishedSurvey/NationalsurveyofNH) (Last accessed 19 Dec 2011).  
25  
26  
27  
28  
29 22. National Audit Office (2005) Tackling Cancer: Improving the Patient Journey.  
30 Department of Health. The Stationery Office: London.  
31  
32 [http://www.nao.org.uk/publications/0405/tackling\\_cancer.aspx](http://www.nao.org.uk/publications/0405/tackling_cancer.aspx) (Last accessed 19 Dec  
33 2011).  
34  
35  
36  
37 23. Gustafsson JE, Stahl PA. STREAMS User's Guide. Version 2.5 for Windows. Mölndal,  
38 Sweden: Multivariate Ware; 2000.  
39  
40  
41  
42 24. Nunnally JC, Bernstein IH. Psychometric Theory, 3rd edn. New York: McGraw-Hill;  
43 1994.  
44  
45  
46  
47 25. Kline P: The Handbook of Psychological Testing. London: Routledge; 1993.  
48  
49  
50 26. Hair J, Anderson RE, Tatham RL, et al. Multivariate Data ANALYSIS with Readings. 4th  
51 edn. Englewood Cliffs, New Jersey: Prentice-Hall international; 1995.  
52  
53  
54 27. Jöreskog KG, Sörbom D. LISREL 8. Structural Equation Modelling with the SIMPLIS  
55 Command Language. Hillsdale NJ: Erlbaum; 1993.  
56  
57  
58  
59  
60

- 1  
2  
3 28. Groves RM, Fowler FJ, Couper MP, et al. *Survey Methodology* (2nd edn). Hoboken, New  
4 Jersey: John Wiley & Sons; 2009.  
5  
6  
7 29. Bjertnæs ØA, Garratt AM, Johannessen JO. Data collection methods and results in users  
8 surveys in mental health care. *Tidsskr Nor Laegeforen* 2006;**126**(11):1481–3.  
9  
10  
11 30. Bjertnæs ØA, Garratt A, Botten G. Nonresponse bias and cost-effectiveness in a  
12 Norwegian survey of family physicians. *Eval Health Prof* 2008;**31**(1):65-80.  
13  
14  
15 31. Bjertnæs ØA, Garratt A, Iversen H, et al. The association between GP and patient ratings  
16 of quality of care at outpatient clinics. *Fam Pract* 2009;**26**(5):384–90.  
17  
18  
19 32. Guldvog B, Hofoss D, Pettersen KI, et al. PS-RESKVA (Patient Satisfaction, Results and  
20 Quality) – patient satisfaction in hospitals. *Tidsskr Nor Laegeforen* 1998;**118**(3):386–91.  
21  
22  
23 33. Jenkinson C, Coulter A, Bruster S, et al. Patients' experiences and satisfaction with health  
24 care: results of a questionnaire study of specific aspects of care. *Qual Saf Health Care*  
25 2002;**11**(4):335–9.  
26  
27  
28 34. Ware JE Jr, Hays RD. Methods for measuring patient satisfaction with specific medical  
29 encounters. *Med Care* 1988;**26**(4):393–402.  
30  
31  
32 35. Williams B, Coyle J, Healy D. The meaning of patient satisfaction: an explanation of high  
33 reported levels. *Soc Sci Med* 1998;**47**(9):1351–9.  
34  
35  
36 36. Sitzia J, Wood N. Patient satisfaction: a review of issues and concepts. *Soc Sci Med*  
37 1997;**45**(12):1829–43.  
38  
39  
40 37. Tourangeau R, Smith TW. Asking sensitive questions: the impact of data collection mode,  
41 question format, and question context. *Pub Opin Quart* 1996;**60**(2):275–304.  
42  
43  
44 38. Peytremann-Bridevaux I, Scherer F, Peer L, et al. Satisfaction of patients hospitalised in  
45 psychiatric hospitals: a randomised comparison of two psychiatric-specific and one  
46 generic satisfaction questionnaires. *BMC Health Serv Res* 2006;**6**:108.  
47  
48  
49  
50  
51  
52  
53  
54  
55  
56  
57  
58  
59  
60

- 1  
2  
3 39. Sjetne IS, Bjertnæs ØA, Olsen RV, et al. The Generic Short Patient Experiences  
4  
5 Questionnaire (GSPEQ): identification of core items from a survey in Norway. *BMC*  
6  
7 *Health Serv Res* 2011;**11**:88.  
8  
9  
10 40. Faber M, Bosch M, Wollersheim H et al. Public reporting in health care: how do  
11  
12 consumers use quality-of-care information? A systematic review. *Med Care*  
13  
14 2009;**47**(1):1–8.  
15  
16 41. Peters E, Dieckmann N, Dixon A, et al. Less is more in presenting quality information to  
17  
18 consumers. *Med Care Res Rev* 2007;**64**(2):169–90.  
19  
20  
21 42. Bjertnæs ØA, Garratt A, Ruud T. Family physicians' experiences with community mental  
22  
23 health centers: a multilevel analysis. *Psychiatr Serv* 2008;**59**(8):864–70.  
24  
25 43. Sjetne IS, Veenstra M, Stavem K. The effect of hospital size and teaching status on patient  
26  
27 experiences with hospital care: a multilevel analysis. *Med Care* 2007;**45**(3):252–8.  
28  
29  
30 44. Keller S, O'Malley AJ, Hays RD, et al. Methods used to streamline the CAHPS Hospital  
31  
32 Survey. *Health Serv Res* 2005;**40**(6 Pt 2):2057–77.  
33  
34  
35  
36  
37  
38  
39  
40  
41  
42  
43  
44  
45  
46  
47  
48  
49  
50  
51  
52  
53  
54  
55  
56  
57  
58  
59  
60

1  
2  
3 **The Cancer Patient Experiences Questionnaire (CPEQ): reliability and construct**  
4 **validity following a national survey to assess hospital cancer care from the patient**  
5 **perspective**  
6  
7  
8  
9

10  
11 **Hilde Hestad Iversen<sup>§</sup>, Olaf Holmboe, Øyvind Andresen Bjertnæs**  
12  
13

14  
15  
16 Department for Quality Measurement and Patient Safety

17  
18 Norwegian Knowledge Centre for the Health Services

19  
20 PO Box 7004 St. Olavs plass,

21  
22 0130 Oslo

23  
24 Norway

25  
26  
27  
28  
29 <sup>§</sup>Corresponding author:

30  
31 Telephone: +47-46400425

32  
33 Fax: +47-23255010

34  
35 HII: [hii@nokc.no](mailto:hii@nokc.no)  
36  
37  
38  
39  
40  
41  
42  
43  
44  
45  
46  
47  
48

49  
50 Keywords: Patient satisfaction, Cancer, Survey, Reliability and validity, Confirmatory factor  
51 analysis  
52  
53  
54

55  
56 3965 words  
57  
58  
59  
60

## ABSTRACT

### Objectives

Patient experience questionnaires have been criticised due to the lack of supporting psychometric evidence. The objective of this study was to describe the development and psychometric evaluation of the Cancer Patient Experiences Questionnaire (CPEQ) in Norway.

### Design

Questionnaire development was based on a literature review of existing questionnaires, patient interviews, expert-group consultations, pretesting of questionnaire items and a national survey. Psychometric evaluation included exploratory and confirmatory factor analysis, and tests of internal consistency reliability and test-retest reliability.

### Setting

Data were collected using a postal survey of cancer patients attending 54 hospitals in all 4 health regions. The subjects were 14,227 adult cancer patients who had attended an outpatient clinic or who had been discharged from an inpatient ward. Patients with all types of cancer were included. Data quality, internal consistency reliability and construct validity were assessed.

### Results

Of the 13,846 patients who received the CPEQ, 7212 (52%) responded. Exploratory factor analysis identified six scales of outpatient experiences relating to nurse contact, doctor contact, information, organisation, patient safety and **contact with** next of kin, and seven scales of inpatient experiences, with the addition of hospital standard to the aforementioned

1  
2  
3 scales. All but two of the scales met the criterion of 0.70 for Cronbach's alpha testing, and  
4  
5 test-retest correlations ranged from 0.57 to 0.85. Confirmatory factor analysis supported the  
6  
7 interpretation of six and seven scales for outpatients and inpatients, respectively. Statistically  
8  
9 significant associations based on explicit hypotheses provided evidence for the construct  
10  
11 validity of the scales. One additional scale measuring the hospital level was identified  
12  
13 ( $\alpha=0.85$ ).  
14  
15

### 16 17 18 **Conclusions** 19

20 The CPEQ is a self-report instrument that includes the most important aspects of patient  
21  
22 experiences with cancer care at hospitals. The instrument was tested following a national  
23  
24 survey in Norway; good evidence is provided herein for the internal consistency reliability,  
25  
26 test-retest reliability and construct validity.  
27  
28  
29  
30  
31  
32  
33  
34  
35  
36  
37  
38  
39  
40  
41  
42  
43  
44  
45  
46  
47  
48  
49  
50  
51  
52  
53  
54  
55  
56  
57  
58  
59  
60

## ARTICLE SUMMARY

### Article focus

- To describe the development and evaluation of the Cancer Patient Experiences Questionnaire (CPEQ).
- Data quality, internal consistency reliability and construct validity were assessed.

### Key messages

- Patient satisfaction questionnaires have generally been criticised due to the lack of supporting psychometric evidence, including reliability and validity data.
- Valid and reliable measures for the measurement of cancer patients' experiences with hospitals are crucial if the data are to be used in quality improvement, business control and by both patients and the general public.

### Strengths and limitations of this study

- The strengths of the present study include the psychometric assessment of the CPEQ following a national survey, including data quality, dimensionality, internal consistency and construct validity.
- The scale **could** prove useful for evaluating cancer patients' experiences with hospitals in Norway and in similar settings in other countries, and includes the most important aspects regarding both inpatient and outpatient hospital care from the patient perspective.
- Further investigation of the explanatory characteristics of variations in cancer patients' experience with health care is warranted.



## INTRODUCTION

The measurement of patient experiences is now recognised as an important part of health-care performance evaluation. Patient experiences are included as one of three core quality dimensions in the Organisation for Economic Cooperation and Development quality indicator framework,[1] and are central to the framework of the World Health Organisation for assessing the performance of health systems.[2] Several studies have shown that patient experiences are positively related to patient satisfaction [3, 4] and that patient satisfaction is positively associated with compliance [5] and health outcomes.[4] Eliciting feedback from patients helps health-care providers to identify potential areas for improvement, which in turn can increase the quality of health care.

The acquisition of valid information requires patient experiences to be measured using rigorously developed and validated tools. Patient satisfaction questionnaires have generally been criticised due to the lack of supporting psychometric evidence, including reliability and validity data. A review of 195 patient satisfaction papers published in 1994 found that the satisfaction instruments presented little evidence of reliability or validity,[6] casting doubt on the credibility of the resultant findings. Furthermore, questionnaires that ask patients to rate their care in terms of how satisfied they are tend to elicit very positive ratings.[4] A more valid approach is to ask patients to report in detail on their experiences by asking them specific questions about certain processes and events; this will provide results that can be easily interpreted and acted upon.[7]

Norway has a national patient experience survey program that is run by the Norwegian Knowledge Centre for the Health Services. The purpose of the program is to systematically measure user experiences with health care, to provide data for quality improvement, business

1  
2  
3 control, hospital choice and public accountability. Due to the aforementioned problems that  
4  
5 arise when attempts are made to measure satisfaction, the instruments focus on experiences of  
6  
7 the healthcare delivery, not satisfaction. In 2007, the Ministry of Health in Norway decided to  
8  
9 measure cancer patients' experiences with hospitals. The Norwegian Knowledge Centre for  
10  
11 the Health Services has developed and validated several generic instruments to be used in  
12  
13 national patient experience surveys,[8–19] but none specifically for cancer patients. Ensuring  
14  
15 the sensitivity of the instrument and detecting changes that are significant for the patient  
16  
17 requires instruments specific to the study objective as well as the population of interest to be  
18  
19 developed.[20] A review of the literature was conducted to determine whether there was an  
20  
21 instrument that included multidimensional scales including different aspects of cancer patient  
22  
23 experiences. Two national surveys of patients' experiences of cancer services have been  
24  
25 carried out in the UK: the first in 1999–2000 by the National Patient Survey Programme [21]  
26  
27 and the second in 2004 by the National Audit Office.[22] However, these surveys included  
28  
29 only six types of cancer: breast, colorectal, lung, ovarian, prostate and non-Hodgkin's  
30  
31 lymphoma. Other questionnaires identified in the review typically addressed quality of life, or  
32  
33 involved specific cancer types, treatments, services or clinical staff; no measures appropriate  
34  
35 for all cancer types, including assessment of inpatient and outpatient cancer care, were  
36  
37 identified. Consequently, the literature review identified shortcomings with existing measures,  
38  
39 and it was decided to develop a new instrument to measure the experiences of hospital care of  
40  
41 both inpatients and outpatients that could be used in a future national survey in Norway.  
42  
43  
44  
45  
46  
47  
48

49 This paper describes the development and evaluation of the Cancer Patient Experiences  
50  
51 Questionnaire (CPEQ). This tool was designed for application in a national survey of adult  
52  
53 cancer patients, whereby the results are published in the form of reports for the public, the  
54  
55  
56  
57  
58  
59  
60

1  
2  
3 government and individual health-care units as a basis for national surveillance, quality  
4  
5 improvement and hospital choice.  
6  
7

## 8 9 **METHODS**

### 10 **Questionnaire development**

11  
12 The questionnaire was developed based on the findings of a literature review of  
13  
14 questionnaires aimed to determine cancer patients' experiences with hospitals, semi-  
15  
16 structured interviews with 13 cancer patients, and focus groups of experts including clinicians  
17  
18 and representatives for cancer patient organisations. This process was designed to ensure  
19  
20 content validity and that the questionnaire addresses important aspects of cancer patient  
21  
22 experiences of care, and to establish a model for including participants in the survey. The  
23  
24 development of the questionnaire also followed previous work in the identification of  
25  
26 domains and items of relevance for the patients.[8–19] We tested the questionnaire by  
27  
28 performing cognitive interviews with 12 cancer patients and a pilot study of 953 cancer  
29  
30 patients at a single hospital. The cognitive interviews and the pilot study suggested minor  
31  
32 changes to the questionnaire, which were discussed within the group of experts before  
33  
34 finalisation.  
35  
36  
37  
38  
39

40  
41  
42 We asked the patients about their overall experiences with a specific hospital. The  
43  
44 questionnaire was divided into separate sections for inpatients and outpatients, consisting  
45  
46 mainly of the same questions, except for six questions included in the inpatient section about  
47  
48 hospital standards and waiting time. The questionnaire also included items concerning aspects  
49  
50 of care irrespective of out- or inpatient settings, as well as sociodemographic and health-status  
51  
52 questions. The final questionnaire comprised 127 items. Items relating to experiences of care  
53  
54 had a five-point scale that range from “not at all” (1) to “a very large extent” (5). Negative  
55  
56  
57  
58  
59  
60

1  
2  
3 items were reverse coded, and a higher score represent a better experience for all items. Scales  
4  
5 were transformed to scores ranging from 0 to 100 where 100 is the best possible. In this study  
6  
7 we enquired about experiences that do not apply to all patients but which are considered  
8  
9 important to the relevant patients. Consequently, the levels of missing data were expected to  
10  
11 reflect patients being at different stages of cancer treatment and having varying levels of  
12  
13 experience with hospital care.  
14  
15

### 16 17 18 **Data collection** 19

20 The questionnaire was mailed to 14,227 patients with all types of cancer aged 16 years or  
21  
22 older who had at least one outpatient appointment or a hospital stay at a Norwegian hospital  
23  
24 from 20 September to 10 December 2009. A maximum of 400 patients from each of the 54  
25  
26 hospitals was included; 400 patients were selected randomly from hospitals with more than  
27  
28 400 eligible patients. Power calculations have been conducted at the hospital level, resulting  
29  
30 in an appropriate sample size of 400 for each hospital. When presenting population estimates,  
31  
32 individual weights are used to adjust for non-response. These are also related to the size of the  
33  
34 hospital populations so that results at higher levels (health enterprise, regions and the nation)  
35  
36 take into account differences in hospital size. The hospitals had the opportunity to exclude  
37  
38 patients who were not considered applicable to participate in a survey, and the patients  
39  
40 themselves could withdraw from the survey at any time by contacting the hospital. Checks  
41  
42 were undertaken to ensure that patients were not sent more than one questionnaire, and the  
43  
44 first hospital episode with a cancer registration was taken as the episode to use in the survey  
45  
46 sample for patients who appeared on the lists more than once. Units for palliative care and  
47  
48 birth and maternity departments were excluded from the survey. The questionnaires were  
49  
50 mailed to the patients by the end of January to mid-May 2010. Non-responders were sent one  
51  
52 reminder after 3 weeks. We also mailed a retest questionnaire to 291 consenting patients  
53  
54  
55  
56  
57  
58  
59  
60

1  
2  
3 approximately 1 week after their first reply for the purpose of assessing test-retest reliability.

4  
5 After the completion of data collection the patient contact information was deleted and the  
6  
7 hospitals transferred the demographic, clinical and administrative data, which were merged  
8  
9 with the patients' responses.  
10

11  
12  
13  
14 The survey was approved by the Norwegian Regional Committee for Medical Research  
15  
16 Ethics, the Data Inspectorate, and the Ministry of Health and Care Services.  
17  
18  
19

### 20 21 **Statistical analysis**

22  
23 Most statistical analyses were carried out using SPSS version 15.0. Confirmatory factor  
24  
25 analyses (CFAs) were conducted using the linear structural relation (LISREL) analysis  
26  
27 program. STREAMS (Structural Equation Modelling Made Simple) offers an interface to the  
28  
29 LISREL program and was used as a support.[23]  
30  
31

32  
33  
34 Separate exploratory factor analyses (EFAs) were carried out for outpatients and inpatients  
35  
36 using principal axis factoring. We expected some correlations among the factors and chose  
37  
38 oblique rotation (promax). The criterion for the number of factors to be rotated was  
39  
40 eigenvalues greater than 1, and items with factor loadings lower than 0.4 were excluded.  
41  
42  
43  
44

45 Cronbach's alpha coefficient was calculated to determine the internal consistency of the  
46  
47 scales. An alpha value greater than 0.70 is considered satisfactory.[24, 25] Internal  
48  
49 consistency was also assessed by item-total correlation, measuring the strength of the  
50  
51 association between an individual item and the total score of the remainder of its scale. A  
52  
53 correlation coefficient of 0.30 or higher has been recommended previously.[26] The intraclass  
54  
55 correlation coefficient was used as an estimate of the test-retest reliability, and was used to  
56  
57  
58  
59  
60

1  
2  
3 assess the correlation between scores obtained at different times for each scale; the estimated  
4  
5 coefficients should exceed 0.7.[24]  
6  
7

8  
9  
10 The item structure from EFAs was used to construct theoretically derived scales. CFA was  
11  
12 applied to further test the relationship between the observed variables and their underlying  
13  
14 latent constructs identified from the EFAs. The LISREL analysis program was used to test the  
15  
16 goodness of fit of the models [27] using various fit indexes, including the root mean square  
17  
18 error of approximation (RMSEA), the goodness-of-fit index (GFI), the comparative fit index  
19  
20 (CFI) and the incremental fit index (IFI). An RMSEA of 0.05 or less, and a GFI and CFI of  
21  
22 0.90 or above are generally taken to indicate a good fit. The IFI values range from 0 to 1, with  
23  
24 larger values indicating a better goodness of fit.  
25  
26  
27

28  
29 Construct validity refers to whether a scale measures or is correlated with the theorised  
30  
31 scientific construct, and was assessed by exploring the associations of scale scores as well as  
32  
33 their associations with additional items not included in the scales. A systematic review  
34  
35 identified 139 articles that provided evidence about determinants of satisfaction,[4] and  
36  
37 concluded that satisfaction was linked to prior satisfaction, predisposition, utilisation, granting  
38  
39 of desires, health status, health outcomes and age. Evidence about the effects of gender,  
40  
41 ethnicity, socioeconomic status and expectations was equivocal. Following the literature  
42  
43 review and previous findings,[4–17] it was hypothesised that scale scores would be correlated  
44  
45 with global satisfaction, age, gender and health status. Time since cancer diagnosis and  
46  
47 whether the treatment provided was considered the best possible were also hypothesised as  
48  
49 potential determinants.  
50  
51  
52  
53  
54  
55  
56  
57  
58  
59  
60

## RESULTS

### Data collection

Of the 14,227 questionnaires that were mailed to cancer patients, 137 were returned due to erroneous addresses, and 244 of the patients had died. Accordingly, the adjusted total sample was 13,846 patients, of which 7212 responded (52%), 6642 patients with experiences from outpatient wards and 4856 patients from inpatient wards; 4460 patients had attended both inpatient and outpatient wards at the hospital. Table 1 lists the characteristics of the respondents.

Table 1. Patient characteristics. Except where stated otherwise, data are *n* (%) values.

| Variable                             | Outpatients<br>(N=6642) | Inpatients<br>(N=4856) | All respondents<br>(N=7212)<br><i>n</i> (%) |
|--------------------------------------|-------------------------|------------------------|---------------------------------------------|
| <b>Gender</b>                        |                         |                        |                                             |
| Male                                 | 3733 (56)               | 2590 (53)              | 4049 (56)                                   |
| Female                               | 2908 (44)               | 2265 (47)              | 3162 (44)                                   |
| <b>Age in years (mean±SD)</b>        | 66±12.2                 | 66±12.2                | 66±12.1                                     |
| <b>Education level</b>               |                         |                        |                                             |
| Primary school                       | 1742 (27)               | 1319 (28)              | 1947 (28)                                   |
| High school                          | 2408 (38)               | 1831 (39)              | 2608 (38)                                   |
| University undergraduate             | 1425 (22)               | 983 (21)               | 1519 (22)                                   |
| University postgraduate              | 838 (13)                | 557 (12)               | 884 (13)                                    |
| <b>Native language</b>               |                         |                        |                                             |
| Norwegian                            | 6324 (97)               | 4628 (97)              | 6858 (97)                                   |
| Sami                                 | 7 (0)                   | 6 (0)                  | 7 (0)                                       |
| Other Nordic                         | 59 (1)                  | 35 (1)                 | 64 (1)                                      |
| Other European                       | 92 (1)                  | 70 (2)                 | 100 (1)                                     |
| Non-European                         | 35 (1)                  | 30 (1)                 | 39 (1)                                      |
| <b>Main activity</b>                 |                         |                        |                                             |
| Work                                 | 1556 (24)               | 1128 (24)              | 1670 (24)                                   |
| Sick leave                           | 1270 (20)               | 994 (21)               | 1369 (19)                                   |
| Retired                              | 3537 (54)               | 2516 (53)              | 3860 (55)                                   |
| Education                            | 33 (1)                  | 27 (1)                 | 35 (1)                                      |
| Home worker                          | 52 (1)                  | 43 (1)                 | 56 (1)                                      |
| Unemployed                           | 24 (0)                  | 18 (0)                 | 28 (0)                                      |
| Other                                | 50 (1)                  | 43 (1)                 | 56 (1)                                      |
| <b>Marital status</b>                |                         |                        |                                             |
| Married                              | 4559 (71)               | 3302 (70)              | 4941 (71)                                   |
| Cohabitant                           | 529 (8)                 | 409 (9)                | 579 (8)                                     |
| Neither married nor cohabitant       | 1347 (21)               | 991 (21)               | 1457 (21)                                   |
| <b>Type of cancer (ICD-10 codes)</b> |                         |                        |                                             |
| Breast                               | 884 (13)                | 669 (14)               | 932 (13)                                    |
| Female genitalia                     | 452 (7)                 | 363 (8)                | 489 (7)                                     |
| Male genitalia                       | 1449 (22)               | 822 (17)               | 1591 (22)                                   |
| Skin                                 | 493 (7)                 | 119 (3)                | 512 (7)                                     |
| Respiratory organs                   | 347 (5)                 | 273 (6)                | 386 (5)                                     |
| Urinary tract                        | 697 (11)                | 641 (13)               | 751 (10)                                    |
| Digestive organs                     | 866 (13)                | 860 (18)               | 984 (14)                                    |
| Blood                                | 1031 (16)               | 728 (15)               | 1103 (15)                                   |
| Other                                | 422 (6)                 | 380 (8)                | 463 (6)                                     |
| <b>Time since diagnosis</b>          |                         |                        |                                             |
| Less than 3 months                   | 171 (3)                 | 132 (3)                | 209 (3)                                     |
| 3–6 months                           | 807 (12)                | 562 (12)               | 929 (13)                                    |
| 6–12 months                          | 1192 (18)               | 840 (18)               | 1295 (18)                                   |
| 1–2 years                            | 1205 (18)               | 883 (19)               | 1286 (18)                                   |
| 2–5 years                            | 1740 (27)               | 1286 (27)              | 1864 (26)                                   |
| More than 5 years                    | 1424 (22)               | 1070 (22)              | 1498 (21)                                   |
| <b>Type of contact</b>               |                         |                        |                                             |
| Examination                          | 3876 (58)               | 2747 (57)              | -                                           |
| Surgery                              | 1928 (29)               | 3189 (66)              | -                                           |
| Radiotherapy                         | 1082 (16)               | 510 (11)               | -                                           |
| Chemotherapy                         | 2345 (35)               | 1181 (24)              | -                                           |
| Hormone therapy                      | 663 (10)                | 220 (5)                | -                                           |
| Control/follow up                    | 4456 (67)               | 1960 (40)              | -                                           |
| Other                                | 492 (7)                 | 570 (12)               | -                                           |

*N*, total number; *n*, number of responses received; ICD-10, International Classification of Diseases, 10th Revision



### Data quality and psychometric evaluation

The levels of missing data and descriptive statistics for the items are presented in Table 2. The levels of missing data ranged from 2% to 12%, which can be considered as acceptable for most items. Responses in the category “not applicable” ranged from 2% to 33%. However, since the questionnaire was intended to apply to all cancer patients, rates of not applicable or missing data higher than 10% were accepted. Mean scores for single items were generally skewed towards a positive rating (Table 2). The mean scores were lowest (at 3.2 for both outpatients and inpatients) for information about pain and pain alleviation. The mean scores were highest for items about patient safety, and ranged from 4.5 to 4.7.

Separate EFAs were conducted for outpatients and inpatients. Results from the first factor analyses for both outpatients and inpatients showed that most of the items addressing organisation loaded on the first factor, which related to nurse contact. For outpatients, this was also the case for items about **contact with** next of kin. Based on both empirical and theoretical assumptions, summed rating scales were constructed for organisation (outpatients and inpatients) and **contact with** next of kin (outpatients).

Further analyses where these items were omitted produced four factors for outpatients and six for inpatients (see Table 2). All item-total correlation coefficients exceeded the 0.4 criterion (range 0.41–0.86). The four factors related to outpatients’ experiences were nurse contact, doctor contact, information and patient safety; the alpha values ranged from 0.61 to 0.92. The four-factor solution accounted for 62% of the total variance. The same four factors were produced for inpatients, comprising the equivalent items, as well as two other factors (**contact with** next of kin and hospital standard); the alpha values ranged from 0.67 to 0.94. These six factors explained 63% of the total variance in the scores for inpatients’ experiences. Table 2

1  
2  
3 lists the factor loadings. All factor loadings for the items exceeded 0.4, and no item had a  
4  
5 cross-loading greater than or equal to 0.40.  
6  
7

8  
9 Alpha values for 11 of the 13 scales satisfied the criterion of 0.70 or higher (Table 2).  
10

11 Cronbach's alpha is sensitive to the number of test items, and the two patient safety scales  
12 that did not meet the criterion of 0.70 (0.614 and 0.667) had three test items each. Item-total  
13 correlation coefficients showed that all items satisfied the stated criterion of 0.40, and it was  
14 decided to keep the six scales for measuring outpatient experiences and the seven scales for  
15 measuring inpatient experiences. Of the 291 patients mailed a retest questionnaire, 229  
16 responded (79%). Table 2 lists the results of the test-retest correlations for the 13 scales. The  
17 test-retest correlation coefficients ranged from 0.57 to 0.81 for outpatients and from 0.62 to  
18 0.85 for inpatients.  
19  
20  
21  
22  
23  
24  
25  
26  
27  
28  
29  
30  
31  
32  
33  
34  
35  
36  
37  
38  
39  
40  
41  
42  
43  
44  
45  
46  
47  
48  
49  
50  
51  
52  
53  
54  
55  
56  
57  
58  
59  
60

Table 2. Descriptive statistics<sup>a</sup>, factor loadings and internal consistency for outpatients and inpatients.

| Scale/item                           | Outpatients (N=6642) |                    |                   |      |                 |                                                     |                                              | Inpatients (N=4856) |                    |                   |      |                 |                                                     |                                              |
|--------------------------------------|----------------------|--------------------|-------------------|------|-----------------|-----------------------------------------------------|----------------------------------------------|---------------------|--------------------|-------------------|------|-----------------|-----------------------------------------------------|----------------------------------------------|
|                                      | Missing (%)          | Does not apply (%) | Mean <sup>a</sup> | SD   | Factor loadings | Cronbach's alpha/item-total correlation coefficient | Test-retest reliability <sup>b</sup> (n=229) | Missing (%)         | Does not apply (%) | Mean <sup>a</sup> | SD   | Factor loadings | Cronbach's alpha/item-total correlation coefficient | Test-retest reliability <sup>b</sup> (n=229) |
| <b>Nurse contact</b>                 |                      |                    | 79.8              |      |                 | 0.92                                                | 0.73                                         |                     |                    | 76.8              |      |                 | 0.93                                                | 0.83                                         |
| 1. Updated about your treatment      | 5                    | 9                  | 4.2               | 0.74 | 0.63            | 0.72                                                |                                              | 5                   | 5                  | 4.1               | 0.77 | 0.66            | 0.77                                                |                                              |
| 2. Followed up on side effects       | 6                    | 29                 | 4.0               | 0.94 | 0.64            | 0.73                                                |                                              | 6                   | 24                 | 4.0               | 0.85 | 0.75            | 0.78                                                |                                              |
| 3. Took your concerns seriously      | 6                    | 19                 | 4.2               | 0.79 | 0.80            | 0.81                                                |                                              | 6                   | 13                 | 4.1               | 0.81 | 0.93            | 0.84                                                |                                              |
| 4. Cared for you                     | 7                    | -                  | 4.4               | 0.70 | 0.88            | 0.79                                                |                                              | 5                   | -                  | 4.3               | 0.73 | 0.85            | 0.81                                                |                                              |
| 5. Provided enough time for dialogue | 8                    | -                  | 3.9               | 0.96 | 0.70            | 0.75                                                |                                              | 5                   | -                  | 3.6               | 0.99 | 0.63            | 0.75                                                |                                              |
| 6. Was understandable                | 7                    | -                  | 4.3               | 0.70 | 0.72            | 0.73                                                |                                              | 5                   | -                  | 4.2               | 0.70 | 0.62            | 0.72                                                |                                              |
| 7. Was competent                     | 8                    | -                  | 4.3               | 0.68 | 0.67            | 0.71                                                |                                              | 5                   | -                  | 4.2               | 0.72 | 0.60            | 0.74                                                |                                              |
| <b>Doctor contact</b>                |                      |                    | 77.6              |      |                 | 0.92                                                | 0.81                                         |                     |                    | 75.8              |      |                 | 0.93                                                | 0.85                                         |
| 1. Updated about your treatment      | 5                    | 5                  | 4.3               | 0.77 | 0.65            | 0.73                                                |                                              | 6                   | 4                  | 4.2               | 0.76 | 0.77            | 0.76                                                |                                              |
| 2. Followed up on side effects       | 7                    | 30                 | 3.8               | 0.98 | 0.62            | 0.72                                                |                                              | 8                   | 28                 | 3.8               | 0.93 | 0.55            | 0.75                                                |                                              |
| 3. Took your concerns seriously      | 6                    | 15                 | 4.0               | 0.87 | 0.83            | 0.83                                                |                                              | 7                   | 14                 | 4.0               | 0.85 | 0.82            | 0.84                                                |                                              |
| 4. Cared for you                     | 6                    | -                  | 4.1               | 0.85 | 0.93            | 0.83                                                |                                              | 6                   | -                  | 4.0               | 0.86 | 0.94            | 0.84                                                |                                              |
| 5. Provided enough time for dialogue | 5                    | -                  | 3.8               | 0.98 | 0.85            | 0.79                                                |                                              | 7                   | -                  | 3.6               | 1.01 | 0.82            | 0.79                                                |                                              |
| 6. Was understandable                | 6                    | -                  | 4.2               | 0.77 | 0.72            | 0.75                                                |                                              | 6                   | -                  | 4.1               | 0.77 | 0.74            | 0.73                                                |                                              |
| 7. Was competent                     | 5                    | -                  | 4.4               | 0.72 | 0.66            | 0.72                                                |                                              | 6                   | -                  | 4.4               | 0.71 | 0.73            | 0.74                                                |                                              |
| <b>Information</b>                   |                      |                    | 67.0              |      |                 | 0.92                                                | 0.79                                         |                     |                    | 65.3              |      |                 | 0.94                                                | 0.78                                         |
| 1. Your illness                      | 2                    | 3                  | 3.9               | 0.87 | 0.47            | 0.73                                                |                                              | 4                   | 5                  | 3.8               | 0.96 | 0.47            | 0.76                                                |                                              |
| 2. Treatment options                 | 3                    | 8                  | 3.9               | 0.95 | 0.51            | 0.72                                                |                                              | 4                   | 11                 | 3.8               | 1.03 | 0.55            | 0.76                                                |                                              |
| 3. Examination and test results      | 3                    | 2                  | 4.0               | 0.91 | 0.41            | 0.67                                                |                                              | 4                   | 4                  | 3.9               | 0.96 | 0.44            | 0.72                                                |                                              |
| 4. Side effects of treatment         | 4                    | 14                 | 3.5               | 1.13 | 0.85            | 0.82                                                |                                              | 5                   | 18                 | 3.5               | 1.14 | 0.91            | 0.85                                                |                                              |
| 5. Effects of treatment              | 5                    | 13                 | 3.7               | 1.03 | 0.82            | 0.83                                                |                                              | 6                   | 14                 | 3.6               | 1.05 | 0.86            | 0.86                                                |                                              |
| 6. Pain to be expected               | 4                    | 18                 | 3.2               | 1.24 | 0.96            | 0.80                                                |                                              | 5                   | 17                 | 3.2               | 1.20 | 0.96            | 0.82                                                |                                              |
| 7. Pain relief                       | 5                    | 21                 | 3.2               | 1.26 | 0.92            | 0.77                                                |                                              | 6                   | 19                 | 3.3               | 1.18 | 0.91            | 0.80                                                |                                              |
| <b>Organisation</b>                  |                      |                    | 71.4              |      |                 | 0.78                                                | 0.77                                         |                     |                    | 69.0              |      |                 | 0.82                                                | 0.85                                         |
| 1. Cooperation between hospital      | 7                    | 21                 | 3.8               | 0.91 | -               | 0.59                                                |                                              | 7                   | 22                 | 3.8               | 0.95 |                 | 0.64                                                |                                              |

|                                                 |    |    |      |      |       |      |      |    |    |      |      |       |      |      |
|-------------------------------------------------|----|----|------|------|-------|------|------|----|----|------|------|-------|------|------|
| departments                                     |    |    |      |      |       |      |      |    |    |      |      |       |      |      |
| 2. Staff collaboration                          | 6  | 10 | 4.1  | 0.77 | -     | 0.64 |      | 6  | 8  | 4.0  | 0.78 |       | 0.71 |      |
| 3. Information provided to the correct person   | 8  | -  | 4.0  | 0.90 | -     | 0.52 |      | 8  | -  | 3.9  | 0.88 |       | 0.65 |      |
| 4. Same group of nurses                         | 10 | -  | 3.6  | 1.14 | -     | 0.49 |      | 5  | -  | 3.4  | 1.04 |       | 0.55 |      |
| 5. Multiple doctors involved was a problem      | 6  | 26 | 3.8  | 1.18 | -     | 0.47 |      | 7  | 18 | 3.8  | 1.14 |       | 0.49 |      |
| 6. One doctor responsible                       | 6  | -  | 3.8  | 1.24 | -     | 0.51 |      | 7  | -  | 3.7  | 1.23 |       | 0.55 |      |
| <b>Patient safety</b>                           |    |    | 90.6 |      |       | 0.61 | 0.57 |    |    | 90.5 |      |       | 0.67 | 0.62 |
| 1. Information deliberately held back           | 4  | -  | 4.5  | 0.87 | -0.57 | 0.44 |      | 5  | -  | 4.6  | 0.80 | -0.64 | 0.49 |      |
| 2. Contradictory information about illness      | 6  | -  | 4.7  | 0.74 | -0.55 | 0.43 |      | 6  | -  | 4.6  | 0.79 | -0.70 | 0.48 |      |
| 3. Perceived incorrect treatment                | 5  | 11 | 4.7  | 0.81 | -0.52 | 0.41 |      | 6  | 7  | 4.6  | 0.82 | -0.66 | 0.47 |      |
| <b>Contact with next of kin</b>                 |    |    | 80.9 |      |       | 0.87 | 0.65 |    |    | 79.9 |      |       | 0.85 | 0.81 |
| 1. Received next of kin                         | 6  | 33 | 4.3  | 0.80 | -     | 0.77 |      | 7  | 17 | 4.2  | 0.77 | 0.75  | 0.76 |      |
| 2. Arranged for next of kin to be present       | 6  | 33 | 4.2  | 0.91 | -     | 0.77 |      | 7  | 22 | 4.1  | 0.87 | 0.88  | 0.78 |      |
| 3. Arranged for interaction with visitors       | -  | -  | -    | -    | -     | -    |      | 6  | 10 | 4.2  | 0.75 | 0.67  | 0.64 |      |
| <b>Hospital standard</b>                        |    |    | -    |      |       | -    | -    |    |    | 71.3 |      |       | 0.74 | 0.75 |
| 1. Arranged for interaction with other patients | -  | -  | -    | -    | -     | -    |      | 6  | -  | 3.9  | 0.85 | 0.45  | 0.50 |      |
| 2. Physical environment                         | -  | -  | -    | -    | -     | -    |      | 12 | -  | 3.6  | 0.94 | 0.66  | 0.58 |      |
| 3. Food                                         | -  | -  | -    | -    | -     | -    |      | 7  | -  | 4.0  | 0.88 | 0.65  | 0.53 |      |
| 4. Cleanliness                                  | -  | -  | -    | -    | -     | -    |      | 7  | -  | 3.9  | 0.89 | 0.62  | 0.54 |      |

<sup>a</sup> Items are scored 1–5 and scales are scored 0–100, where a higher score represents a better experience.

<sup>b</sup> Intraclass correlation coefficient (ICC).

1  
2  
3 CFAs were applied to examine the hypothesised factor structures. The measurement part  
4 specifies the relationship of the latent to the observed variables, and the structural part of the  
5 models specifies the relationship among the latent variables. First, the six-factor solution of  
6 the outpatient experiences was tested, which revealed that there was a satisfactory model fit to  
7 the data ( $\chi^2=23559.96$ ,  $p<0.001$ ,  $df=458$ ,  $RMSEA=0.091$ ,  $GFI=0.81$ ,  $CFI=0.96$  and  $IFI=0.96$ ).  
8 The results are shown in Figure 1. The exogenous, latent variables were the six factors, and  
9 the endogenous, latent variable was outpatient experiences, introducing a second-order  
10 analysis examining the correlations among the first-order factors to examine predictions on  
11 the endogenous variable. Organisation was the strongest predictor ( $\beta=0.95$ ), but nurse contact  
12 ( $\beta=0.89$ ), doctor contact ( $\beta=0.88$ ) and information ( $\beta=0.76$ ) were also strongly associated  
13 with the endogenous, latent variable. This was also the case for **contact with** next of kin  
14 ( $\beta=0.61$ ) and patient safety ( $\beta=0.60$ ). Second, the seven-factor solution of the inpatient  
15 experiences was tested, which indicated a slightly better fit ( $\chi^2=26697.60$ ,  $p<0.001$ ,  $df=621$ ,  
16  $RMSEA=0.083$ ,  $GFI=0.81$ ,  $CFI=0.97$  and  $IFI=0.97$ ; Figure 2). The results were consistent  
17 with those of the previous CFA; the inpatient experiences factor was strongly affected by  
18 organisation ( $\beta=0.93$ ), nurse contact ( $\beta=0.89$ ), doctor contact ( $\beta=0.89$ ), information ( $\beta=0.77$ ),  
19 **contact with** next of kin ( $\beta=0.70$ ) and hospital standard ( $\beta=0.70$ ). The prediction from patient  
20 safety was slightly lower ( $\beta=0.56$ ).  
21  
22  
23  
24  
25  
26  
27  
28  
29  
30  
31  
32  
33  
34  
35  
36  
37  
38  
39  
40  
41  
42  
43  
44  
45  
46  
47  
48  
49  
50  
51  
52  
53  
54  
55  
56  
57  
58  
59  
60

Figure 1: Confirmatory factor analysis (CFA) model for outpatients.

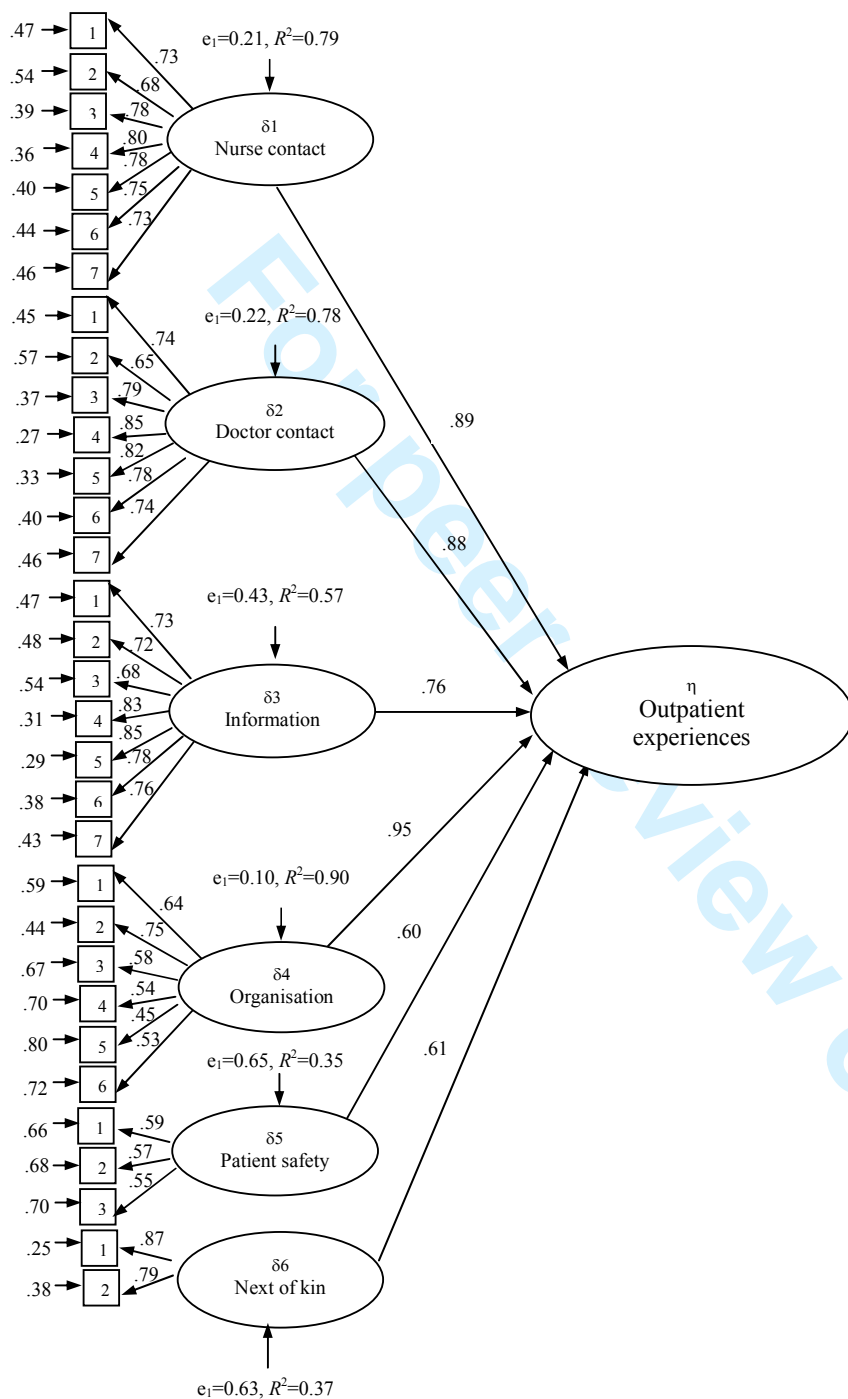

RMSEA=0.091, GFI=0.81, CFI=0.97, IFI=0.96

Figure 2: CFA model for inpatients.

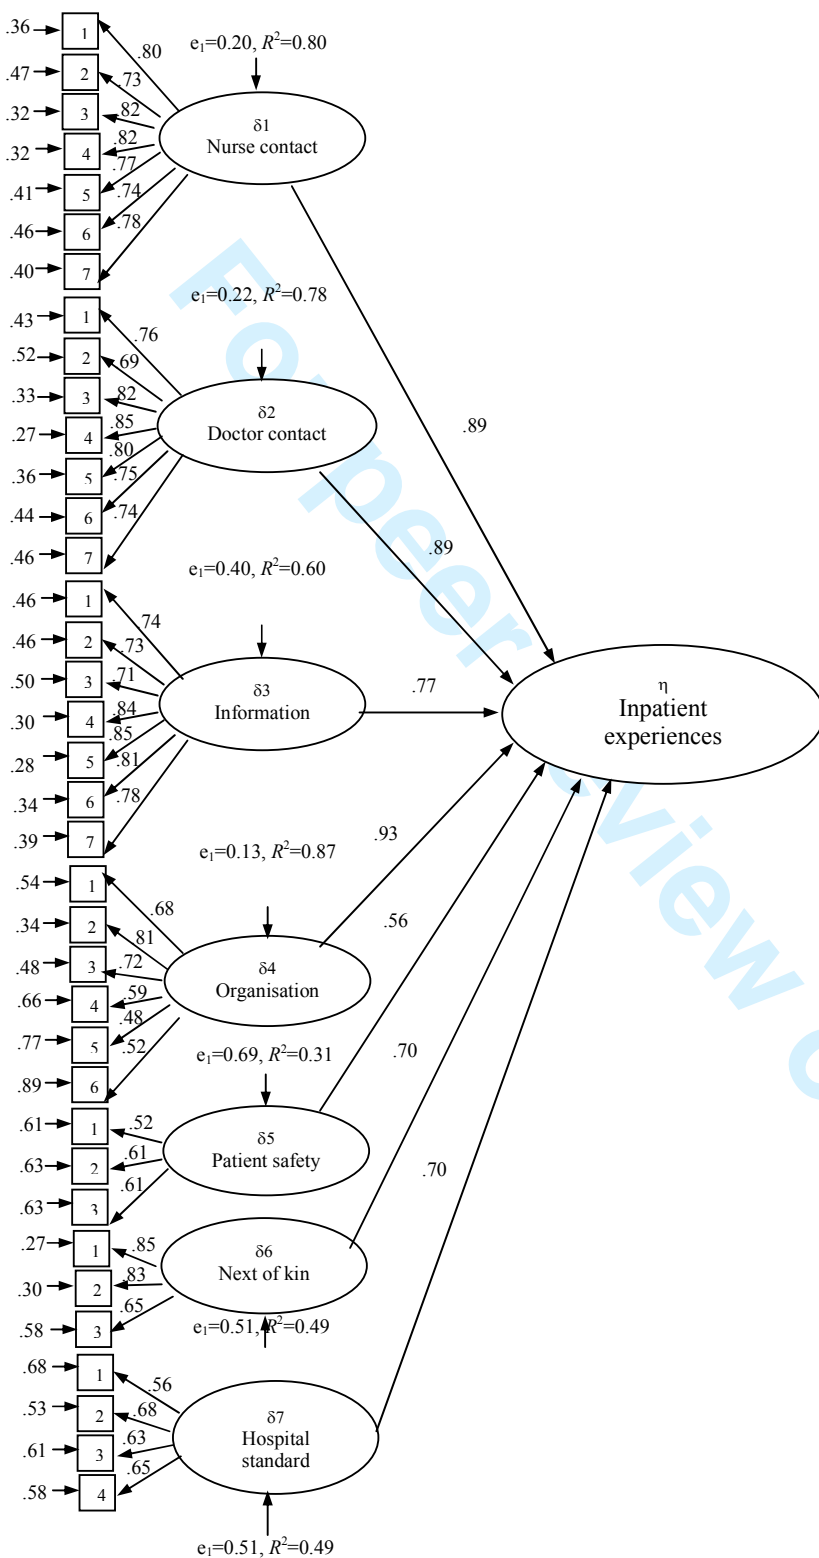

RMSEA=0.083, GFI=0.81, CFI=0.97, IFI=0.97

1  
2  
3 Table 3 gives the results of construct validity testing. The correlations between the scale  
4  
5 scores were all significant at the  $p<0.001$  level (range of correlation coefficients, 0.27–0.77).  
6  
7 The correlations were weakest for the patient safety scales and the other scales, and strongest  
8  
9 for organisation and doctor contact. The correlations between scale scores and other single  
10  
11 items were strongest for the patients' confidence in that the treatment received was the best  
12  
13 possible, with the correlation coefficients ranging from 0.43 to 0.70. Overall satisfaction and  
14  
15 overall experiences were moderately to strongly correlated to the scales (range of correlation  
16  
17 coefficients, 0.24–0.59), with all correlations significant at the  $p<0.001$  level. A significant  
18  
19 correlation was also found between all of the scales and the patients' health status, indicating  
20  
21 that patients with poorer health scored substantially lower on all scales. Age and time since  
22  
23 cancer diagnosis were more weakly correlated with the scales. Results from  $t$ -tests showed  
24  
25 significant but small differences between men and women on four scales. Relative to women,  
26  
27 male outpatients had significantly lower scores on the **contact with** next of kin scale ( $t=-2.03$ ,  
28  
29  $p<0.05$ ); however, male inpatients had higher scores for nurse contact ( $t=2.79$ ,  $p<0.01$ ),  
30  
31 organisation ( $t=3.78$ ,  $p<0.001$ ) and hospital standard ( $t=6.84$ ,  $p<0.001$ ).  
32  
33  
34  
35  
36  
37  
38  
39  
40  
41  
42  
43  
44  
45  
46  
47  
48  
49  
50  
51  
52  
53  
54  
55  
56  
57  
58  
59  
60



Table 3. Correlations<sup>a</sup> between scale scores and individual items for outpatients and inpatients.

| Scale/item                                              | Outpatients (N=6642) |                     |                     |                     |                     |                          | Inpatients (N=4856) |                    |                    |                     |                     |                          |                     |
|---------------------------------------------------------|----------------------|---------------------|---------------------|---------------------|---------------------|--------------------------|---------------------|--------------------|--------------------|---------------------|---------------------|--------------------------|---------------------|
|                                                         | Nurse contact        | Doctor contact      | Information         | Organisation        | Patient safety      | Contact with next of kin | Nurse contact       | Doctor contact     | Information        | Organisation        | Patient safety      | Contact with next of kin | Hospital standard   |
| Doctor contact                                          | 0.73                 |                     |                     |                     |                     |                          | 0.75                |                    |                    |                     |                     |                          |                     |
| Information                                             | 0.64                 | 0.68                |                     |                     |                     |                          | 0.68                | 0.71               |                    |                     |                     |                          |                     |
| Organisation                                            | 0.68                 | 0.73                | 0.61                |                     |                     |                          | 0.73                | 0.77               | 0.68               |                     |                     |                          |                     |
| Patient safety                                          | 0.38                 | 0.44                | 0.38                | 0.41                |                     |                          | 0.39                | 0.44               | 0.39               | 0.40                |                     |                          |                     |
| Contact with next of kind                               | 0.63                 | 0.58                | 0.47                | 0.53                | 0.29                |                          | 0.65                | 0.61               | 0.51               | 0.55                | 0.29                |                          |                     |
| Hospital standard                                       | -                    | -                   | -                   | -                   | -                   | -                        | 0.55                | 0.50               | 0.42               | 0.48                | 0.27                | 0.55                     |                     |
| Overall satisfaction with service                       | 0.51                 | 0.51                | 0.51                | 0.48                | 0.39                | 0.36                     | 0.59                | 0.56               | 0.52               | 0.55                | 0.40                | 0.44                     | 0.43                |
| Overall experience with service                         | 0.44                 | 0.43                | 0.45                | 0.44                | 0.24                | 0.35                     | 0.52                | 0.45               | 0.46               | 0.48                | 0.26                | 0.41                     | 0.39                |
| Confident that treatment provided was the best possible | 0.64                 | 0.69                | 0.57                | 0.61                | 0.43                | 0.54                     | 0.70                | 0.69               | 0.58               | 0.65                | 0.43                | 0.57                     | 0.48                |
| Health status                                           | -0.17                | -0.21               | -0.22               | -0.16               | -0.18               | -0.10                    | -0.23               | -0.22              | -0.24              | -0.22               | -0.18               | -0.13                    | -0.17               |
| Age                                                     | -0.04 <sup>**</sup>  | 0.02 <sup>ns</sup>  | -0.11               | -0.01 <sup>ns</sup> | 0.10                | -0.00 <sup>ns</sup>      | 0.01 <sup>ns</sup>  | 0.02 <sup>ns</sup> | -0.09              | -0.01 <sup>ns</sup> | 0.11                | 0.01 <sup>ns</sup>       | 0.08                |
| Time since cancer diagnosis                             | -0.02 <sup>ns</sup>  | -0.01 <sup>ns</sup> | -0.01 <sup>ns</sup> | -0.04 <sup>**</sup> | -0.03 <sup>ns</sup> | -0.06 <sup>**</sup>      | -0.04 <sup>**</sup> | -0.03 <sup>*</sup> | 0.01 <sup>ns</sup> | -0.05 <sup>**</sup> | -0.01 <sup>ns</sup> | -0.05 <sup>**</sup>      | -0.00 <sup>ns</sup> |

<sup>a</sup>Data are Spearman's rank correlations (*r*). All correlations are significant at  $p < 0.001$  except for <sup>\*\*</sup> ( $p < 0.01$ ), <sup>\*</sup> ( $p < 0.05$ ) and <sup>ns</sup> ( $p > 0.05$ ).

The questionnaire also included items about hospital care not directly related to either outpatient or inpatient wards, addressing the hospitals' extra-medical services, cooperation with the primary doctor and other community services, and information on how to manage future problems. The items had high levels of responses in the category "not applicable" (range, 12–63) indicating that they are not relevant to a high proportion of the respondents. Table 4 indicates that the items have lower mean scores than those included in the other factors, ranging from 2.5 to 3.4. Factor analysis revealed a one-factor solution accounting for 57% of the variance of the scores (Table 4). The factor loadings ranged from 0.56 to 0.79, the item-total correlation coefficients ranged from 0.52 to 0.71 and the results from reliability analysis yielded a Cronbach's alpha of 0.85. The test-retest correlation coefficient for this scale was 0.78.

Table 4. Descriptive statistics<sup>a</sup>, factor loadings and internal consistency for all patients.

| Scale/item                                              | All patients (N=7212) |                    |                   |      |                 |                                                     |                                              |
|---------------------------------------------------------|-----------------------|--------------------|-------------------|------|-----------------|-----------------------------------------------------|----------------------------------------------|
|                                                         | Missing (%)           | Does not apply (%) | Mean <sup>a</sup> | SD   | Factor loadings | Cronbach's alpha/item-total correlation coefficient | Test-retest reliability <sup>b</sup> (n=229) |
| <b>Extra-medical services, information, cooperation</b> |                       |                    | <b>49.2</b>       |      |                 | <b>0.85</b>                                         | <b>0.78</b>                                  |
| Hospital extra-medical services                         | 6                     | 45                 | 2.5               | 1.35 | 0.65            | 0.60                                                |                                              |
| Hospital cooperation with primary doctor                | 6                     | 16                 | 3.4               | 1.15 | 0.56            | 0.52                                                |                                              |
| Hospital cooperation with community services            | 7                     | 63                 | 2.8               | 1.37 | 0.64            | 0.60                                                |                                              |
| Information about future problems                       | 5                     | 12                 | 3.2               | 1.22 | 0.74            | 0.65                                                |                                              |
| Information about managing potential relapse            | 6                     | 19                 | 2.9               | 1.30 | 0.79            | 0.69                                                |                                              |
| Information about rehabilitation                        | 6                     | 40                 | 2.5               | 1.31 | 0.79            | 0.71                                                |                                              |

<sup>a</sup> Items are scored 1–5 and scales are scored 0–100, where a higher score represents a better experience.

<sup>b</sup> ICC.

The scale was not correlated significantly with time since cancer diagnosis, but patients with poorer health reported significantly more negative experiences, as did older patients and women (see Table 5). Results from *t*-tests showed that male patients reported significantly more positive experiences than did female patients ( $t=3.54$ ,  $p<0.001$ ).

Table 5. Correlations<sup>a</sup> between scale score and individual items for all patients.

|                             | All patients (N=7212)                               |
|-----------------------------|-----------------------------------------------------|
|                             | Extra-medical services,<br>information, cooperation |
| Scale/item                  |                                                     |
| Health status               | -0.23                                               |
| Age                         | -0.11                                               |
| Time since cancer diagnosis | -0.02 <sup>ns</sup>                                 |

<sup>a</sup>All correlations are significant at  $p < 0.001$  except for ns ( $p > 0.05$ ).

## DISCUSSION

This study was part of the first national survey undertaken in Norway to assess cancer patients' experiences with somatic hospitals. The development of the CPEQ followed a review of the literature, interviews with cancer patients, and consultation with an expert group of professionals and researchers. The resulting questionnaire underwent a thorough process of piloting and testing for data quality, reliability and construct validity, as recommended for evaluating such questionnaires. The CPEQ addresses broad domains of cancer-related care at somatic hospitals, rather than focusing on specific treatments, cancer types or specific professionals involved in care of the patients.

The results from the survey can be used as national quality indicators in Norway and were designed to inform patient choice and for quality improvement. The CPEQ was designed specifically for use with cancer patients attending somatic hospitals, and was assumed to increase content validity from a patient perspective as well as allowing hospital staff to investigate in detail the extent to which their service meets the needs of their patients.

Questionnaires that assess specific aspects of care allow the domains where patients have poorer experiences to be identified and potentially improved.

Satisfactory evidence of internal consistency, test-retest reliability and construct validity was obtained, indicating that the CPEQ can be considered a high-quality instrument. The results of

1  
2  
3 the EFAs and tests of internal consistency provided empirical support for the scales, and  
4  
5 confirmed that both outpatient and inpatient experiences are multidimensional concepts.  
6  
7 CFAs were supportive of the structures suggested by EFAs. There is evidence for construct  
8  
9 validity of the questionnaire following the application of hypotheses based on previous  
10  
11 research findings and theory.[7, 8–19] The results also provide support for the longitudinal  
12  
13 temporal stability of the measure. High agreement between scores administered  
14  
15 approximately 1 week apart provided good evidence of the test-retest reliability of the CPEQ.  
16  
17  
18  
19

20  
21 Some limitations of the study should be considered. The levels of missing data suggest that  
22  
23 the measure is acceptable to patients. However, some of the included items were only relevant  
24  
25 for some of the respondents. It may be possible to extract a shorter version of the CPEQ with  
26  
27 fewer questions without sacrificing the psychometric qualities of the measure, but this task  
28  
29 was beyond the scope of this study. Another potential limitation is the response rate. In  
30  
31 general, postal surveys have lower response rates than other data-collection modes.[4] Non-  
32  
33 response bias occurs when the main variables differ systematically between respondents and  
34  
35 non-respondents.[28] The response rate (52%) means that almost half of the patients failed to  
36  
37 respond; however, it was relatively high compared with previous user experience surveys  
38  
39 carried out in Norway.[8–19] Findings from some of these surveys have shown that the low  
40  
41 response rates have not caused serious bias.[15, 29–32] The findings from a Norwegian  
42  
43 follow-up study involving a hospital population showed that postal respondents and non-  
44  
45 respondents had almost the same scores.[32] These studies indicate that non-response might  
46  
47 be of less concern, but uncertainty related to external validity means that more research is  
48  
49 needed on the effect of non-response in patient experience surveys on cancer care and that the  
50  
51 main findings in this study should be replicated in future studies.  
52  
53  
54  
55  
56  
57  
58  
59  
60

1  
2  
3 Consistent with previous findings,[33–35] some skewing towards positive assessment was  
4 identified. Whether this reflects truly positive experiences or low expectations is  
5 unknown.[36] As for any study based on self-reports, social desirability bias and recall bias  
6 may also have affected the results. Respondents may introduce bias in several ways, for  
7 example by giving socially desirable responses as a result of cognitive consistency pressure  
8 (making ratings congruent with their continuing use of the service) and through acquiescent  
9 response sets (a tendency always to agree or reply positively).[4] However, respondents have  
10 been shown to give more positive and socially desirable responses in interview surveys than  
11 in self-administered surveys.[37] Moreover, it is assumed that recall bias is less likely when  
12 asking about the overall experience rather than about a specific visit or hospitalisation.  
13  
14  
15  
16  
17  
18  
19  
20  
21  
22  
23  
24

25  
26  
27 Instead of developing a cancer-specific questionnaire, one of the existing generic  
28 questionnaires could potentially have been used in the national survey, such as the Patient  
29 Experience Questionnaire.[8] This would have reduced the resource requirements, and also  
30 has some empirical support. One study compared the measurement properties and the  
31 patients' evaluation of one generic and two psychiatric-specific patient satisfaction  
32 questionnaires in a sample of psychiatric patients. The results indicated that no single  
33 instrument was superior in either respect.[38] Another study identified ten generic core items  
34 covering major dimensions of experiences that patients across a range of specialist health-care  
35 services report to be important.[39] A short, generic questionnaire might be expected to give a  
36 higher response rate and better comparability than the CPEQ, but would not be suited for the  
37 purpose of a national survey in Norway. The purpose of the present study was a broad  
38 assessment of hospital cancer care. Furthermore, content validity is better for a cancer-  
39 specific questionnaire, since all activities are directed against securing validity for cancer  
40  
41  
42  
43  
44  
45  
46  
47  
48  
49  
50  
51  
52  
53  
54  
55  
56  
57  
58  
59  
60

1  
2  
3 patients, rather than to patients in general. Naturally, a national survey with a narrower focus  
4  
5 could have used a generic and perhaps shorter questionnaire.  
6  
7

8  
9 Results from the national patient experience survey program in Norway are used to develop  
10  
11 quality indicators presented both to the public and to the responsible institutions. Public use  
12  
13 includes an Internet site for free hospital choice in Norway. Research has shown that patients  
14  
15 have difficulty understanding quality information,[40] and that “less is more” in this  
16  
17 respect.[41] Therefore, an aggregated and overall measure of experiences with the hospitals  
18  
19 seems appropriate in the context of presenting information to patients. Further research is  
20  
21 needed to determine how to construct a composite score, including how to weight each of the  
22  
23 underlying subdimensions. More specific results are called for when reporting information to  
24  
25 health providers with the aim of evaluating and improving the quality of care.[33]  
26  
27

28  
29 Consequently, aggregated scores on the 13 CPEQ subdimensions might be a useful  
30  
31 supplement when reporting results to the responsible hospitals.  
32  
33

34  
35  
36 Comparing the contribution at the organisational and individual levels is relevant for  
37  
38 comparisons of hospitals based on patient evaluations. The approach for institutional  
39  
40 benchmarking in the national survey program involves developing an appropriate case-mix  
41  
42 model and correct for multiple comparisons in statistical testing. Another emerging approach  
43  
44 is to use multilevel analysis to estimate the amount of variation in scores that can be explained  
45  
46 by levels above the individual level.[42] A previous study of patient experiences found that  
47  
48 only a small part of the variation is attributable to the organisational level.[43] Future studies  
49  
50 based on the CPEQ should explore this topic further in order to elucidate the usefulness of the  
51  
52 CPEQ as a basis for quality indicators at the hospital level. This also includes research on  
53  
54 hospital-level reliability, which is based on the theory that patients who are treated at the same  
55  
56  
57  
58  
59  
60

1  
2  
3 hospital should agree regarding their assessments of that hospital. The larger the ratio of  
4  
5 between- to within-hospital variation in the scores, and the larger the number of respondents,  
6  
7 the more precise will be the measurement of differences between hospitals, and thus the  
8  
9 greater the reliability of the scores.[44]  
10

11  
12  
13  
14 Patient satisfaction questionnaires have been criticised for insufficient knowledge of their  
15  
16 reliability and validity in psychometric testing.[3] The strengths of the present study include  
17  
18 the psychometric assessment of the CPEQ following a national survey, including data quality,  
19  
20 dimensionality, internal consistency and construct validity. The scale should prove useful for  
21  
22 evaluating cancer patients' experiences with hospitals in Norway and in similar settings in  
23  
24 other countries, and includes the most important aspects regarding both inpatient and  
25  
26 outpatient hospital care from the patient perspective.  
27  
28  
29  
30

### 31 **Conclusions**

32  
33 Valid and reliable measures for the measurement of cancer patients' experiences with  
34  
35 hospitals are crucial if the data are to be used in quality improvement, business control and by  
36  
37 both patients and the general public. The CPEQ includes the most important aspects of cancer  
38  
39 patients' experiences with somatic hospitals, from the perspective of the cancer patients  
40  
41 themselves. The present study has provided strong evidence for the high data quality, internal  
42  
43 consistency, content and construct validity of this questionnaire. The questionnaire is  
44  
45 recommended for future applications designed to assess cancer patients' experiences of both  
46  
47 inpatient and outpatient care in Norway and similar settings in other countries. Further  
48  
49 investigation of the explanatory characteristics of variations in cancer patients' experience  
50  
51 with health care is warranted.  
52  
53  
54  
55  
56  
57  
58  
59  
60

## Acknowledgements

The authors thank Tomislav Dimoski at the Norwegian Knowledge Centre for Health Services, Oslo, Norway, for developing the software necessary for gathering data from the hospitals, and for conducting the data collection and quality assurance of data. We also thank Saga Høgheim and Marit Skarpaas, who carried out most of the practical tasks relating to data collection, as well as members of the expert group that contributed to the development of the questionnaire and survey design.

## Competing interests

The authors declare that they have no competing interests.

## Funding

The survey was funded by the Norwegian Ministry of Health.

## Authors' contributions

All authors contributed to the design of the questionnaire and survey. H.I.I. conducted the analysis and drafted the manuscript. H.I.I. and O.H. were involved in the data acquisition. All authors have made significant contributions by critically reviewing the manuscript and have read and approved the final version.



**REFERENCES**

1. Kelly E, Hurst J. Health Care Quality Indicators Project: Conceptual Framework Paper. OECD Health Working Papers 23-2006. Paris: OECD, 2006.
2. Murray CJ, Frenk J. A framework for assessing the performance of health systems. *Bull World Health Organ* 2000;**78**(6):717–31.
3. Bjertnæs ØA, Sjetne IS, Iversen HH. Overall patient satisfaction with hospitals: effects of patient-reported experiences and fulfilment of expectations. *BMJ Qual Saf* 2012;**21**(1):39–46.
4. Crow R, Gage H, Hampson S, et al. The measurement of satisfaction with healthcare: implications for practice from a systematic review of the literature. *Health Technol Assess* 2002;**6**(32):1–244.
5. Barbosa CD, Balp MM, Kulich K, et al. A literature review to explore the link between treatment satisfaction and adherence, compliance, and persistence. *Patient Prefer Adherence* 2012;**6**:39–48.
6. Sitzia J. How valid and reliable are patient satisfaction data? An analysis of 195 studies. *Int J Qual Health Care* 1999;**11**(4):319–28.
7. Cleary P, Edgman-Levitan S, McMullen W, et al. The relationship between reported problems and summary evaluations of hospital care. *QRB Qual Rev Bull* 1992; **18**(2):53–9.
8. Pettersen KI, Veenstra M, Guldvog B, et al. The Patient Experiences Questionnaire: development, validity and reliability. *Int J Qual Health Care* 2004;**16**(6):453–63.
9. Garratt AM, Bjertnæs ØA, Krogstad U, et al. The OutPatient Experiences Questionnaire (OPEQ): data quality, reliability and validity in patients attending 52 Norwegian hospitals. *Qual Saf Health Care* 2005;**14**(6):433–7.

10. Garratt AM, Danielsen K, Bjertnæs ØA, et al. PIPEQ – a method for measurement of user satisfaction in mental health services. *Tidsskr Nor Laegeforen* 2006;**126**(11):1478–80.
11. Garratt AM, Bjørngaard JH, Dahle KA, et al. The Psychiatric Out-Patient Experiences Questionnaire (POPEQ): data quality, reliability, and validity in patients attending 90 Norwegian clinics. *Nord J Psychiatry* 2006;**60**(2):89–96.
12. Garratt AM, Bjertnæs ØA, Barlinn J. Parent experiences of paediatric care (PEPC) questionnaire: reliability and validity following a national survey. *Acta Paediatr* 2007;**96**(2):246–52.
13. Bjertnæs ØA, Garratt AM, Nessa J. The GPs' Experiences Questionnaire (GPEQ): reliability and validity following a national survey to assess GPs' views of district psychiatric services. *Fam Pract* 2007;**24**(4):336–42.
14. Bjertnæs ØA, Garratt A, Ruud T, et al. The General Practitioner Experiences Questionnaire (GPEQ): validity and reliability following the inclusion of new accessibility items. *Fam Pract* 2010;**27**(5):513–9.
15. Garratt AG, Bjertnæs ØA, Holmboe O, et al. Parent Experiences Questionnaire for Child and Adolescent Mental Health Services (PEQ-CAMHS): reliability and validity following a national survey. *Child Adolesc Psychiatry Ment Health* 2011;**5**:18.
16. Garratt AM, Danielsen K, Forland O, et al. The Patient Experiences Questionnaire for Out-of-Hours Care (PEQ-OHC): data quality, reliability, and validity. *Scand J Prim Health Care* 2010;**28**(2):95–101.
17. Oltedal S, Garratt A, Bjertnæs ØA, et al. The NORPEQ patient experiences questionnaire: data quality, internal consistency and validity following a Norwegian inpatient survey. *Scand J Public Health* 2007;**35**(5):540–7.

- 1  
2  
3 18. Bjertnæs ØA, Lyngstad I, Malterud K, et al. The Norwegian EUROPEP questionnaire for  
4 patient evaluation of general practice: data quality, reliability and construct validity. *Fam*  
5 *Pract* 2011;**28**(3):342–9.  
6  
7  
8  
9  
10 19. Olsen RV, Garratt AM, Iversen HH, et al. Rasch analysis of the Psychiatric Out-Patient  
11 Experiences Questionnaire (POPEQ). *BMC Health Serv Res* 2010;**10**:282.  
12  
13  
14 20. Brédart A, Morvan E, Savignoni A, et al. Respiratory Gated Radiotherapy Study Group  
15 Stic-Rar 2003. Patient's perception of care quality during radiotherapy sessions using  
16 respiratory gating techniques: validation of a specific questionnaire. *Cancer Invest.*  
17  
18 2011;**29**(2):145–52.  
19  
20  
21  
22 21. Department of Health (2002) National Survey: Cancer Patients.  
23  
24 <http://www.dh.gov.uk/en/Publicationsandstatistics/PublishedSurvey/NationalsurveyofNH>  
25 [Spatients/Nationalsurveycancer/index.htm](http://www.dh.gov.uk/en/Publicationsandstatistics/PublishedSurvey/NationalsurveyofNH) (Last accessed 19 Dec 2011).  
26  
27  
28  
29 22. National Audit Office (2005) Tackling Cancer: Improving the Patient Journey.  
30 Department of Health. The Stationery Office: London.  
31  
32 [http://www.nao.org.uk/publications/0405/tackling\\_cancer.aspx](http://www.nao.org.uk/publications/0405/tackling_cancer.aspx) (Last accessed 19 Dec  
33 2011).  
34  
35  
36  
37 23. Gustafsson JE, Stahl PA. STREAMS User's Guide. Version 2.5 for Windows. Mölndal,  
38 Sweden: Multivariate Ware; 2000.  
39  
40  
41  
42 24. Nunnally JC, Bernstein IH. Psychometric Theory, 3rd edn. New York: McGraw-Hill;  
43 1994.  
44  
45  
46  
47 25. Kline P: The Handbook of Psychological Testing. London: Routledge; 1993.  
48  
49  
50 26. Hair J, Anderson RE, Tatham RL, et al. Multivariate Data ANALYSIS with Readings. 4th  
51 edn. Englewood Cliffs, New Jersey: Prentice-Hall international; 1995.  
52  
53  
54 27. Jöreskog KG, Sörbom D. LISREL 8. Structural Equation Modelling with the SIMPLIS  
55 Command Language. Hillsdale NJ: Erlbaum; 1993.  
56  
57  
58  
59  
60

- 1  
2  
3 28. Groves RM, Fowler FJ, Couper MP, et al. *Survey Methodology* (2nd edn). Hoboken, New  
4  
5 Jersey: John Wiley & Sons; 2009.  
6  
7 29. Bjertnæs ØA, Garratt AM, Johannessen JO. Data collection methods and results in users  
8  
9 surveys in mental health care. *Tidsskr Nor Laegeforen* 2006;**126**(11):1481–3.  
10  
11 30. Bjertnæs ØA, Garratt A, Botten G. Nonresponse bias and cost-effectiveness in a  
12  
13 Norwegian survey of family physicians. *Eval Health Prof* 2008;**31**(1):65-80.  
14  
15 31. Bjertnæs ØA, Garratt A, Iversen H, et al. The association between GP and patient ratings  
16  
17 of quality of care at outpatient clinics. *Fam Pract* 2009;**26**(5):384–90.  
18  
19 32. Guldvog B, Hofoss D, Pettersen KI, et al. PS-RESKVA (Patient Satisfaction, Results and  
20  
21 Quality) – patient satisfaction in hospitals. *Tidsskr Nor Laegeforen* 1998;**118**(3):386–91.  
22  
23 33. Jenkinson C, Coulter A, Bruster S, et al. Patients' experiences and satisfaction with health  
24  
25 care: results of a questionnaire study of specific aspects of care. *Qual Saf Health Care*  
26  
27 2002;**11**(4):335–9.  
28  
29 34. Ware JE Jr, Hays RD. Methods for measuring patient satisfaction with specific medical  
30  
31 encounters. *Med Care* 1988;**26**(4):393–402.  
32  
33 35. Williams B, Coyle J, Healy D. The meaning of patient satisfaction: an explanation of high  
34  
35 reported levels. *Soc Sci Med* 1998;**47**(9):1351–9.  
36  
37 36. Sitzia J, Wood N. Patient satisfaction: a review of issues and concepts. *Soc Sci Med*  
38  
39 1997;**45**(12):1829–43.  
40  
41 37. Tourangeau R, Smith TW. Asking sensitive questions: the impact of data collection mode,  
42  
43 question format, and question context. *Pub Opin Quart* 1996;**60**(2):275–304.  
44  
45 38. Peytremann-Bridevaux I, Scherer F, Peer L, et al. Satisfaction of patients hospitalised in  
46  
47 psychiatric hospitals: a randomised comparison of two psychiatric-specific and one  
48  
49 generic satisfaction questionnaires. *BMC Health Serv Res* 2006;**6**:108.  
50  
51  
52  
53  
54  
55  
56  
57  
58  
59  
60

- 1  
2  
3 39. Sjetne IS, Bjertnæs ØA, Olsen RV, et al. The Generic Short Patient Experiences  
4  
5 Questionnaire (GSPEQ): identification of core items from a survey in Norway. *BMC*  
6  
7 *Health Serv Res* 2011;**11**:88.  
8  
9  
10 40. Faber M, Bosch M, Wollersheim H et al. Public reporting in health care: how do  
11  
12 consumers use quality-of-care information? A systematic review. *Med Care*  
13  
14 2009;**47**(1):1–8.  
15  
16 41. Peters E, Dieckmann N, Dixon A, et al. Less is more in presenting quality information to  
17  
18 consumers. *Med Care Res Rev* 2007;**64**(2):169–90.  
19  
20  
21 42. Bjertnæs ØA, Garratt A, Ruud T. Family physicians' experiences with community mental  
22  
23 health centers: a multilevel analysis. *Psychiatr Serv* 2008;**59**(8):864–70.  
24  
25 43. Sjetne IS, Veenstra M, Stavem K. The effect of hospital size and teaching status on patient  
26  
27 experiences with hospital care: a multilevel analysis. *Med Care* 2007;**45**(3):252–8.  
28  
29  
30 44. Keller S, O'Malley AJ, Hays RD, et al. Methods used to streamline the CAHPS Hospital  
31  
32 Survey. *Health Serv Res* 2005;**40**(6 Pt 2):2057–77.  
33  
34  
35  
36  
37  
38  
39  
40  
41  
42  
43  
44  
45  
46  
47  
48  
49  
50  
51  
52  
53  
54  
55  
56  
57  
58  
59  
60

Figure 1: Confirmatory factor analysis (CFA) model for outpatients.

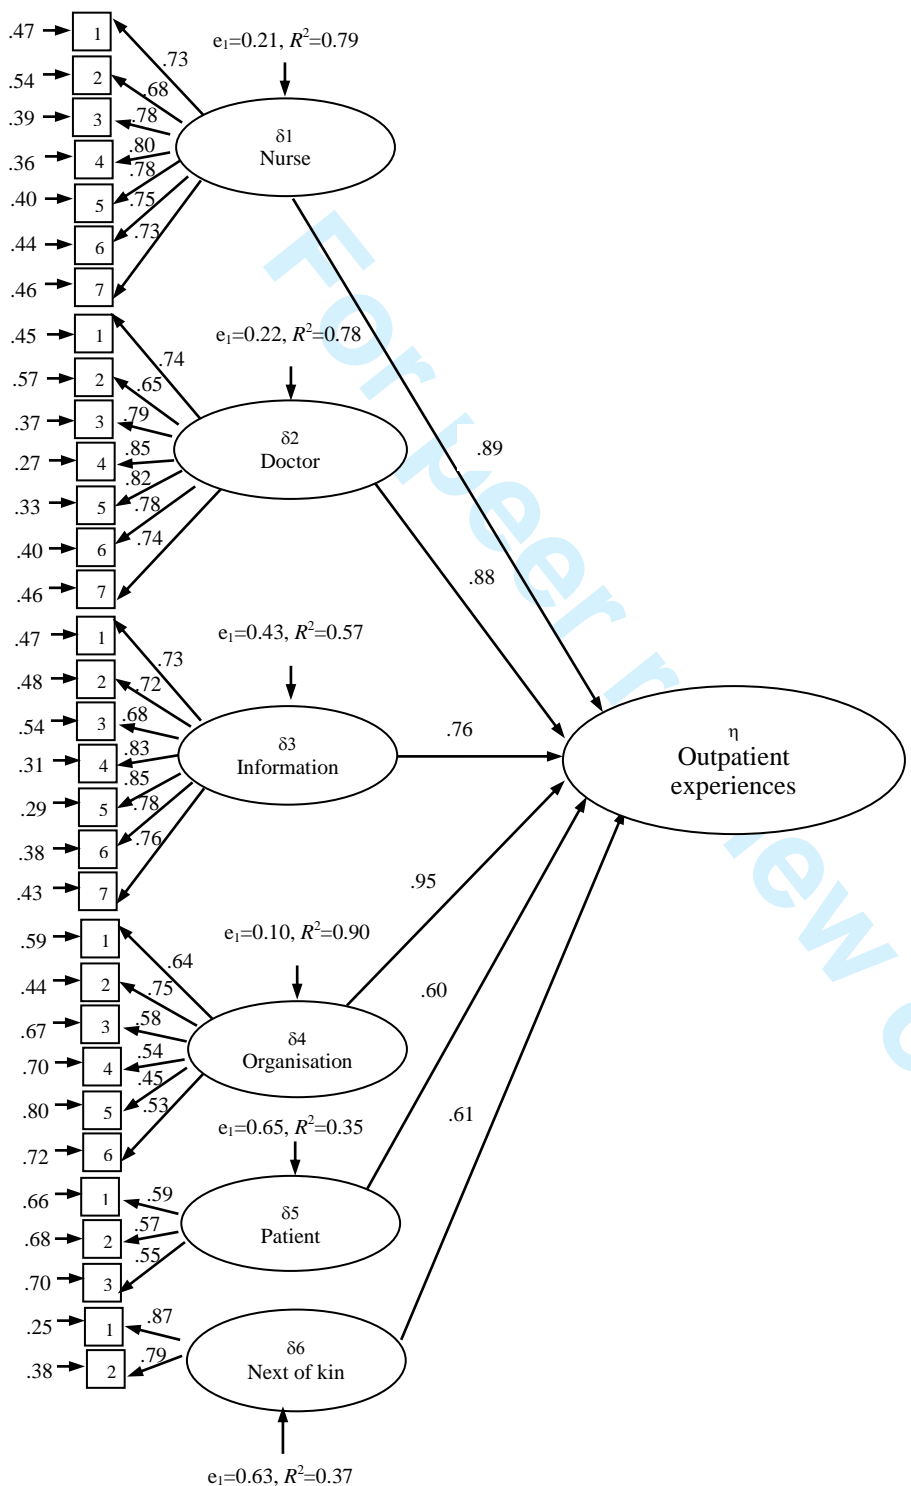

Figure 2: CFA model for inpatients.

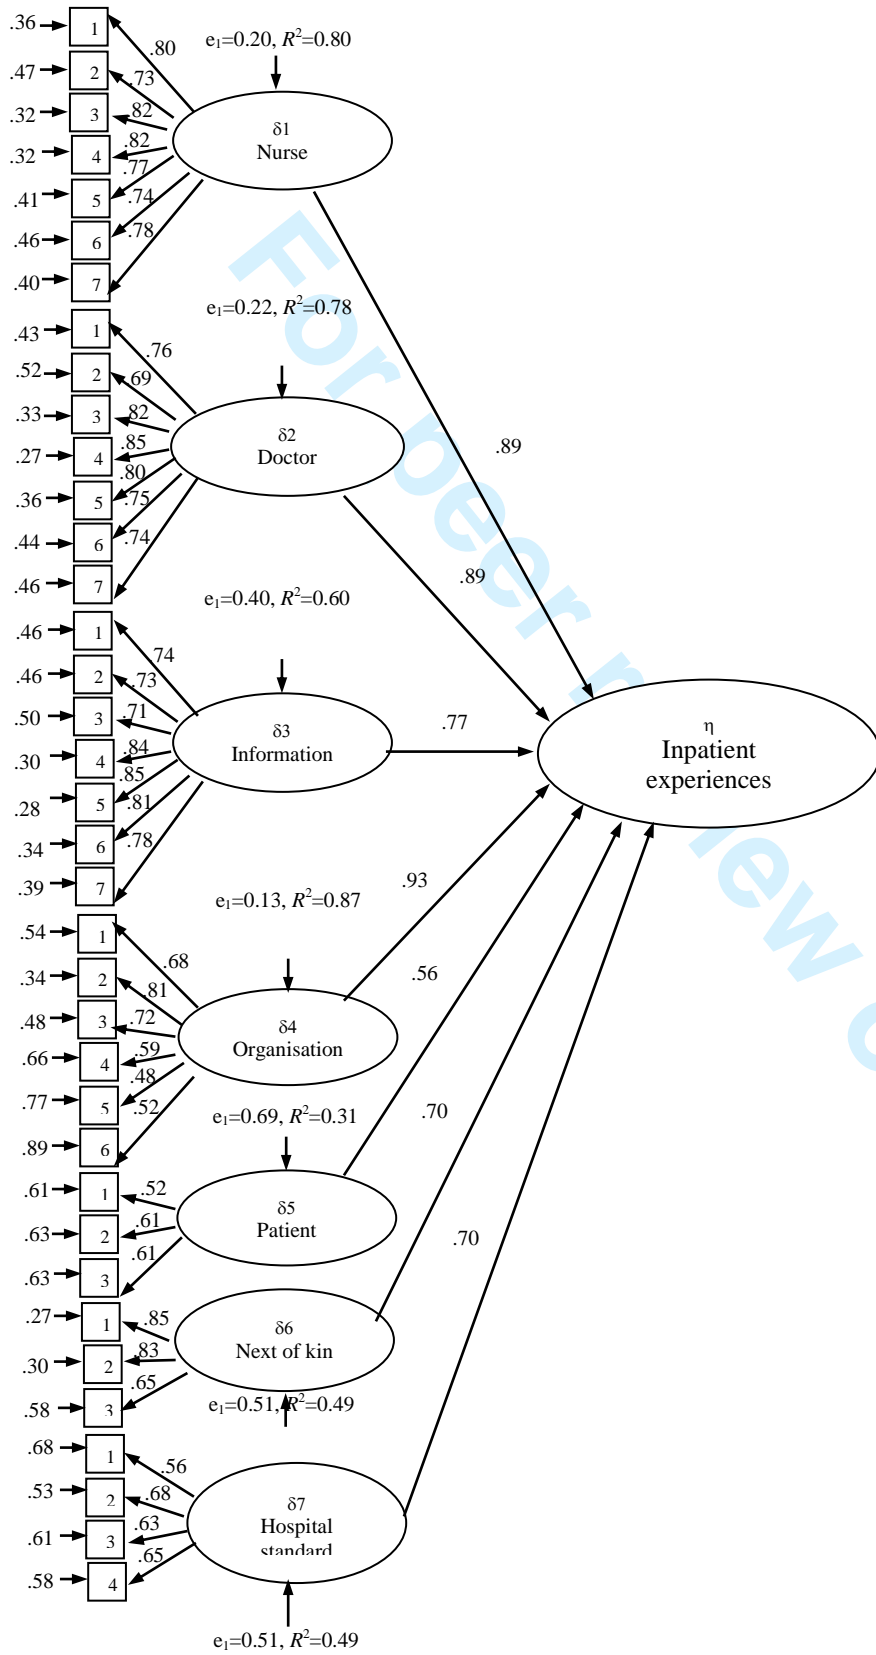

Supplement: bmjopen-2012-001437.draft_revisions.pdf [file bmjopen-2012-001437.draft_revisions.pdf]
